# Supplementary material for: Major excursions in sulfur isotopes linked to permafrost change in Eurasia during the last 50,000 Years.
Source: Research Square preprint supplement (doi:10.21203/rs.3.rs-2556240/v1), 2023-02-16
Supplement: Supplementary file 1 [file d2140532e02f06961eefbc77.xlsx]

## Sheet: Directly dated data
Site	Country	Latitude	Longitude	Sample/Excavation Information	Sample Code	Other sample codes associated with specimen	Faunal Category	Genus/Species	Sample Material	Skeletal element	14C lab code	14C date	14C uncertainty	cal BP from (1 sigma)	cal BP to (1 sigma)	Median Date cal BP (2 sigma)	%S	delta 34S	C:S	N:S	14C reference	Sulfur isotope reference	Permafrost category: (PF=permafrost, LGM = Last Glacial Maximum)	on/near loess?	Collagen source
62 rue Henry-Farman (15th arrondissment)	France	48.83	2.27	Décap.sud iso822	PHF-11		Bos/Bison	Bos primigenius	bone	metatarsal	GrA-45018	9285	40	10567	10412	10466	0.16	11.6	672	213	Leduc et al. 2013	Drucker et al. 2020	PF at LGM not today	no	NA
62 rue Henry-Farman (15th arrondissment)	France	48.83	2.27	Est iso1291	PHF-31		Sus	Sus scrofa	bone	radius	GrA-50908	8930	55	10190	9916	10046	0.18	9.5	595	183	Leduc et al. 2013	Drucker et al. 2020	PF at LGM not today	no	NA
Abri Pataud	France	44.93	1.01		PATi-4		Mammuthus	Mammuthus primigenius	tooth	Ivory	GrA-56410	27610	170	31686	31324	31517	0.18	11.9	595	177	Drucker et al. 2015a	Drucker et al. 2015a	No PF past or today	NA	NA
Abri Pataud	France	44.93	1.01		PATi-8		Mammuthus	Mammuthus primigenius	tooth	Ivory	GrA-56409	28050	170	32205	31690	32001	0.2	13.6	477	142	Drucker et al. 2015a	Drucker et al. 2015a	No PF past or today	NA	NA
Abri Pataud	France	44.93	1.01		PAT-4		Rangifer	Rangifer tarandus	bone	Metacarpal l	GrA-45013	21800	90	26240	25906	26037	0.2	7.8	794	241	Drucker et al. 2015a	Drucker et al. 2015a	No PF past or today	NA	NA
Abri Pataud	France	44.93	1.01		PAT-7		Rangifer	Rangifer tarandus	bone	Metacarpal l	GrA-45132	22360	90	26911	26466	26715	0.1	8.8	843	250	Drucker et al. 2015a	Drucker et al. 2015a	No PF past or today	NA	NA
Abri Pataud	France	44.93	1.01		PAT-5		Rangifer	Rangifer tarandus	bone	Tibia	GrA-45133	21910	90	26281	26015	26151	0.2	15.2	812	248	Drucker et al. 2015a	Drucker et al. 2015a	No PF past or today	NA	NA
Acqualunga	Italy	45.326	9.9545		OxA-11283		Mammuthus	Mammuthus primigenius	bone	bone	OxA-11283	39650	700	43800	42541	43124	0.2	4.4	676	203	Barnes et al. 2007	This study	No PF past or today	NA	ORAU collagen left over from 14C dating
Aitzbitarte III exterior	Spain	43.27	-1.9		AIT26	28522	Cervus elaphus	Cervus elaphus	bone	rib	OxA-32422	29130	310	34060	33270	33639	0.2	8.2	575	194	Jones et al. 2018a	Jones et al. 2018a	No PF past or today	NA	NA
Aitzbitarte III exterior	Spain	43.27	-1.9		AIT5	28507	Cervus elaphus	Cervus elaphus	bone	Tibia	OxA-32417	34900	600	40660	39493	40093	0.2	9.4	575	184	Jones et al. 2018a	Jones et al. 2018a	No PF past or today	NA	NA
Aitzbitarte III exterior	Spain	43.27	-1.9		AIT7	28513	Cervus elaphus	Cervus elaphus	bone	Centrotarsal	OxA-32420	31090	400	36024	35140	35488	0.19	10.2	589	191	Jones et al. 2018a	Jones et al. 2018a	No PF past or today	NA	NA
Aitzbitarte III exterior	Spain	43.27	-1.9		AIT12	28518	Cervus elaphus	Cervus elaphus	bone	Humerus	OxA-32499	29020	320	34001	33121	33498	0.18	10.5	637	214	Jones et al. 2018a	Jones et al. 2018a	No PF past or today	NA	NA
Aitzbitarte III exterior	Spain	43.27	-1.9		AIT10	28516	Cervus elaphus	Cervus elaphus	bone	Humerus	OxA-32421	31300	400	36100	35329	35690	0.18	11.9	618	199	Jones et al. 2018a	Jones et al. 2018a	No PF past or today	NA	NA
Aitzbitarte III exterior	Spain	43.27	-1.9		AIT2	28506	Cervus elaphus	Cervus elaphus	bone	Tibia	OxA-32416	30900	390	35633	34762	35282	0.2	12.6	568	190	Jones et al. 2018a	Jones et al. 2018a	No PF past or today	NA	NA
Aitzbitarte III exterior	Spain	43.27	-1.9		AIT19	28509	Equus	Equus ferus	bone	radius	OxA-32418	31600	400	36294	35509	35948	0.21	9.2	543	179	Jones et al. 2018a	Jones et al. 2018a	No PF past or today	NA	NA
Aitzbitarte III exterior	Spain	43.27	-1.9		AIT21	28511	Equus	Equus ferus	bone	Tibia	OxA-32419	31950	450	36859	35859	36335	0.21	10.2	545	166	Jones et al. 2018a	Jones et al. 2018a	No PF past or today	NA	NA
Amalda Cave	Spain	43.29	-2.04		AMA26	28543	Cervus elaphus	Cervus elaphus	bone	Tibia	OxA-32426	28540	310	33210	32163	32752	0.17	11.9	677	208	Jones et al. 2018a	Jones et al. 2018a	No PF past or today	NA	NA
Amalda Cave	Spain	43.29	-2.04		AMA2	28524	Cervus elaphus	Cervus elaphus	bone	Metatarsal	OxA-32500	44500	2100	49746	44988	47802	0.18	12	606	184	Jones et al. 2018a	Jones et al. 2018a	No PF past or today	NA	NA
Amalda Cave	Spain	43.29	-2.04		AMA13	28530	Equus	Equus ferus	bone	metacarpal	OxA-32425	28640	310	33350	32231	32912	0.18	9.9	648	197	Jones et al. 2018a	Jones et al. 2018a	No PF past or today	NA	NA
Amalda Cave	Spain	43.29	-2.04		OxA-10103	IB.9	Unidentified Cervid	Megaloceros giganteus	bone	bone	OxA-10103	21000	140	25565	25182	25354	0.14	13.4224	860.669	259.761	Stuart & Lister 2004	This study	No PF past or today	NA	Pre-extracted collagen from ORAU, N isotopes reported in Reade et al. 2023
Andernach	Germany	50.43	7.4		UPN-515B	OxA-1126	Equus	Equus sp.	bone	Bone, fragments of ribs, trabecular bone	OxA-1125	12930	180	15722	15210	15467	0.144824	-12.0894	722.04	218.622	Hedges et al. 1987	This study	PF at LGM not today	no	Collagen extracted for Reade et al. 2023 (N isotopes also reported in Reade et al. 2023)
Andernach	Germany	50.43	7.4		UPN-530	OxA-1126	Equus	Equus sp.	bone	Bone, rib fragment	OxA-1126	12890	140	15616	15217	15415	0.13691	-10.5879	824.665	251.78	Hedges et al. 1987	This study	PF at LGM not today	no	Collagen extracted for Reade et al. 2023 (N isotopes also reported in Reade et al. 2023)
Andernach	Germany	50.43	7.4		UPN-531B	OxA-1130	Equus	Equus sp.	bone	Bone fragments	OxA-1130	12950	140	15684	15285	15492	0.110118	-9.96698	868.374	264.929	Hedges et al. 1987	This study	PF at LGM not today	no	Collagen extracted for Reade et al. 2023 (N isotopes also reported in Reade et al. 2023)
Andernach	Germany	50.43	7.4		UPN-527	OxA-10493	Equus	Equus sp.	bone	unknown	OxA-10493	13185	80	15954	15706	15828	0.139657	-9.69648	821.483	247.406	Higham 2011	This study	PF at LGM not today	no	Pre-extracted collagen from ORAU, N isotopes reported in Reade et al. 2023
Andernach	Germany	50.43	7.4	m² 24/85 + m² 24/86 + m² 25/85 + m² 25/86	UPN-511	OxA-985	Rupicapra	Rupicapra rupicapra?	bone	Bone	OxA-V-2793-12C	11820	50	13754	13606	13679	0.173946	-3.63171	583.247	173.117	Reade et al. 2023	This study	PF at LGM not today	no	Collagen extracted for Reade et al. 2023 (N isotopes also reported in Reade et al. 2023)
Andernach	Germany	50.43	7.4	m² 20/54-41	UPN-512	OxA-V-2770-54	Cervus elaphus	Cervus elaphus	bone	Bone, shaft fragment	OxA-V-2770-54C	12070	50	14046	13814	13924	0.140172	-5.36853	648.082	198.273	Reade et al. 2023	This study	PF at LGM not today	no	Collagen extracted for Reade et al. 2023 (N isotopes also reported in Reade et al. 2023)
Andernach	Germany	50.43	7.4	m² 21/82-13, N1	UPN-513	OxA-V-2770-55	Bos/Bison	Bos/bison	bone	Bone	OxA-V-2770-55C	11410	50	13325	13186	13275	0.158041	2.48416	696.404	202.353	Reade et al. 2023	This study	PF at LGM not today	no	Collagen extracted for Reade et al. 2023 (N isotopes also reported in Reade et al. 2023)
Andernach	Germany	50.43	7.4	m² 25/85-86 + m² 25/86-61 (same sample as OxA- 984)	UPN-514	OxA-V-2770-56	Cervus elaphus	Cervus elaphus	bone	Bone, shaft fragments	OxA-V-2770-56C	11960	50	14002	13778	13861	0.155696	-3.08067	644.894	192.045	Reade et al. 2023	This study	PF at LGM not today	no	Collagen extracted for Reade et al. 2023 (N isotopes also reported in Reade et al. 2023)
Andernach	Germany	50.43	7.4	C 2: Grube 35 (Niv. 50)	UPN-517B	OxA-V-2774-57	Equus	Equus sp.	bone	Bone, fragments of ribs, trabecular bone	OxA-V-2774-57C	13250	60	16010	15808	15913	0.123649	-11.1489	880.791	268.43	Reade et al. 2023	This study	PF at LGM not today	no	Collagen extracted for Reade et al. 2023 (N isotopes also reported in Reade et al. 2023)
Andernach	Germany	50.43	7.4	C 2: Grube 35-2 (Planum 10)	UPN-518	OxA-V-2776-18	Equus	Equus sp.	bone	Bone, shaft fragment	OxA-V-2776-18C	13220	50	15961	15785	15871	0.12543	-9.22517	865.402	263.649	Reade et al. 2023	This study	PF at LGM not today	no	Collagen extracted for Reade et al. 2023 (N isotopes also reported in Reade et al. 2023)
Andernach	Germany	50.43	7.4	m² 20/87-26 + m² 20/87-35 + m² 20/87-42 + m² 20/87-48	UPN-526	OxA-V-2776-19	Cervus elaphus	Cervus elaphus	bone	Bone fragment	OxA-V-2776-19C	12450	50	14875	14370	14610	0.151699	-7.25326	678.482	201.829	Reade et al. 2023	This study	PF at LGM not today	no	Collagen extracted for Reade et al. 2023 (N isotopes also reported in Reade et al. 2023)
Andernach	Germany	50.43	7.4	AN2 17/90 N6A 262	UPN-599	A/AND/B/56 orginally thought to be reindeer	Equus	Equus sp.	bone	not given	OxA-V-3102-18C	13152	37	15844	15696	15775	0.16	-9.4	636	198	Reade et al. 2023	This study	PF at LGM not today	no	Collagen extracted for Reade et al. 2023 (N isotopes also reported in Reade et al. 2023)
Andernach	Germany	50.43	7.4	AN2 21/85-109; PI. 4A; Vt. 4.	UPN-1008	A/AND/44	Equus	Equus sp.	bone	humerus dext	OxA-V-2216-43	13135	55	15839	15657	15754	0.14	-11.1438	799.017	243.58	Stevens et al. 2009a	This study	PF at LGM not today	no	Collagen extracted for Reade et al. 2023 (N isotopes also reported in Reade et al. 2023)
Andernach	Germany	50.43	7.4	AN2 20/85-158; Pl 4A; Vt. 2	UPN-1010	A/AND/B/35	Equus	Equus sp	bone	femur	OxA-V-2218-39	12270	50	14271	14090	14199	0.17	-7.01814	681.076	203.976	Stevens et al. 2009a	This study	PF at LGM not today	no	Collagen extracted for Reade et al. 2023 (N isotopes also reported in Reade et al. 2023)
Andernach	Germany	50.43	7.4	Grabung 1883: Concentration 3? (RGZM6/1 RLMB/S378)	UPN-525	UPN-853, OxA-18409	Equus	Equus sp.	bone	Bone, rib with cutmarks	OxA-18409	13025	50	15706	15522	15606	0.267112	-0.81986	413.328	123.207	Stevens et al. 2009a	This study	PF at LGM not today	no	Collagen extracted for Reade et al. 2023 (N isotopes also reported in Reade et al. 2023)
Andernach	Germany	50.43	7.4	17/85 P16 5B 254	UPN-597	A/AND/B/51	Rangifer	Rangifer tarandus	bone	not given	OxA-V-3106-28C	13250	65	16016	15802	15914	0.16529	-6.76744	598.146	175.962	Stevens et al. 2009a	This study	PF at LGM not today	no	Collagen extracted for Reade et al. 2023 (N isotopes also reported in Reade et al. 2023)
Andernach	Germany	50.43	7.4	AN2 24/88 PL 12B	UPN-608	A/AND/B/82	Alces	Alces alces	bone	phalanx 2	OxA-V-3102-14C	12340	35	14793	14178	14335	0.147871	-7.01692	728.5	221.661	Stevens et al. 2009a	This study	PF at LGM not today	no	Collagen extracted for Reade et al. 2023 (N isotopes also reported in Reade et al. 2023)
Andernach	Germany	50.43	7.4	AN2 20/84 P2 40	UPN-609	A/AND/B/85	Alces	Alces alces	bone	humerus	OxA-V-3102-15C	11807	33	13750	13601	13675	0.15	0	717	206	Stevens et al. 2009a	This study	PF at LGM not today	no	Collagen extracted for Reade et al. 2023 (N isotopes also reported in Reade et al. 2023)
Andernach	Germany	50.43	7.4	AN2 GR26 PL90 279	UPN-617	A/AND/B/43	Equus	Equus sp.	bone	humerus	OxA-V-2223-37	12675	55	15194	15020	15111	0.144619	-10.12	790.31	239.783	Stevens et al. 2009a	This study	PF at LGM not today	no	Collagen extracted for Stevens et al., 2009a (N isotopes also reported in Reade et al. 2023)
Andernach	Germany	50.43	7.4	AN2 22/87 Niv. 3 17	UPN-619	A/AND/B/100	Bos/Bison	Bos/bison	bone	femur	OxA-V-3102-16C	12001	34	13995	13799	13910	0.18	-2.5	680	190	Stevens et al. 2009a	This study	PF at LGM not today	no	Collagen extracted for Reade et al. 2023 (N isotopes also reported in Reade et al. 2023)
Ash Tree Cave	UK	53.28	-2.23		OxA-14196		Coelodonta	Coleodonta antiquitus	bone	left ulna	OxA-14196	37540	370	42275	41939	42092	0.14	9.38407	808.532	261.207	Jacobi et al. 2009	This study	PF at LGM not today	no	Pre-extracted collagen from ORAU, N isotopes reported in Reade et al. 2023
Ash Tree Cave	UK	53.28	-2.23	ATC 1959, AI, spit 12, bag 8	UPN-873	A/AT/B/22	Rangifer	Rangifer tarandus	bone	humerus (right, shaft fragment)	OxA-V-2794-37C	31160	270	35900	35286	35568	0.177937	4.47737	629.408	195.974	Reade et al. 2023	This study	PF at LGM not today	no	Collagen extracted for Stevens 2005 (N isotopes also reported in Reade et al. 2023)
Baikal	Russia	51.8	103		OxA-21015		Mammuthus	Mammuthus primigenius	bone	bone	OxA-21015	33190	240	38374	37308	37898	0.19	0.481567	615.698	181.542	Palkopoulou et al. 2013	This study	PF throughout past 50,000 years	NA	ORAU collagen left over from 14C dating
Baikal	Russia	51.8	103		OxA-21013		Mammuthus	Mammuthus primigenius	bone	bone	OxA-21013	46600	900	50275	47889	49260	0.16	4.21274	761.615	227.371	Palkopoulou et al. 2013	This study	PF throughout past 50,000 years	NA	ORAU collagen left over from 14C dating
Ballaugh	UK	54.3	-4.53		OxA-18811		Megaloceros	Megaloceros giganteus	bone	bone	OxA-18811	12130	50	14090	13875	14028	0.27	10.1011	443.575	136.306	Lister and Stuart, 2019	This study	PF at LGM not today	no	Pre-extracted collagen from ORAU, N isotopes reported in Reade et al. 2023
Baranica Cave	Serbia	43.33	22.17		OxA-13827		Megaloceros	Megaloceros giganteus	bone	bone	OxA-13827	23520	110	27820	27619	27702	0.15	3.9121	802.86	244.082	Lister and Stuart, 2019	This study	No PF past or today	NA	Pre-extracted collagen from ORAU, N isotopes reported in Reade et al. 2023
Baume Noire	France	47.46	5.94		FRT-1		Rangifer	Rangifer tarandus	bone	metacarpal	Ly-3292(Poz)	13045	75	15761	15517	15629	0.18	6.2	600	182	Bocherens et al. 2011	Drucker et al. 2012	PF at LGM not today	yes	NA
Baume Noire	France	47.46	5.94		FRT-2		Rangifer	Rangifer tarandus	bone	metapodial	Ly-5217(GrA)	19310	80	23661	23061	23233	0.17	-1.5	603	202	Drucker et al. 2012	Drucker et al. 2012	PF at LGM not today	yes	NA
Baume Noire	France	47.46	5.94		FRT-3		Rangifer	Rangifer tarandus	bone	metacarpal	Ly-5218(GrA)	18070	80	22128	21921	22022	0.14	6	782	236	Drucker et al. 2012	Drucker et al. 2012	PF at LGM not today	yes	NA
Bedburg	Germany	51.07	6.52	BED KO 101/103 4	UPN-555	A/BED/B/12	Cervus elaphus	Cervus elaphus	bone	tibia	OxA-V-3102-20C	10022	29	11613	11399	11517	0.204664	-0.261197	573.811	167.167	Reade et al. 2023	This study	PF at LGM not today	yes	Collagen extracted for Reade et al. 2023 (N isotopes also reported in Reade et al. 2023)
Bedburg	Germany	51.07	6.52	BED KO 84/104 1	UPN-545	A/BED/B/1	Equus	Equus sp.	bone	femur	OxA-V-3102-19C	10234	30	11945	11833	11902	0.161087	-0.694959	707.765	212.348	Reade et al. 2023	This study	PF at LGM not today	yes	Collagen extracted for Reade et al. 2023 (N isotopes also reported in Reade et al. 2023)
Berezovy Log	Russia	58.217	60.583		OxA-19515		Megaloceros	Megaloceros giganteus	bone	bone	OxA-19515	12105	45	14070	13868	13972	0.19	-0.886205	609.638	182.968	Lister and Stuart, 2019	This study	PF at LGM not today	beyond loess map extent	ORAU collagen left over from 14C dating
Bishopbriggs, Lanarskshire	UK	55.9	-4.2		OxA-10965		Mammuthus	Mammuthus primigenius	tooth	tooth	OxA-10965	42450	650	45546	44582	45120	0.18	4.65376	664.891	199.516	Lister & Stuart in prep	This study	PF at LGM not today	no	ORAU collagen left over from 14C dating
Blätterhöhle	Germany	51.358	7.551	Qu 14a/Po. 15			Cervid	Deer	bone	not given	NA	7549	22	8386	8350	8371	0.3	6.6	427	126	Bollongino et al. 2013	Bollongino et al. 2013	PF at LGM not today	yes	NA
Blätterhöhle	Germany	51.358	7.551	BH 04/089			Cervus elaphus	Red deer	bone	not given	NA	7110	40	7973	7870	7940	0.2	5.4	491	143	Bollongino et al. 2013	Bollongino et al. 2013	PF at LGM not today	yes	NA
Blätterhöhle	Germany	51.358	7.551	BH 07 Qu 13d Po.16			Sus	Pig	bone	not given	NA	8194	77	9269	9025	9166	0.2	4.5	564	170	Bollongino et al. 2013	Bollongino et al. 2013	PF at LGM not today	yes	NA
Blizhniy Log 2003	Russia	55.2	92.28		OxA-20261		Coelodonta	Coelodonta antiquitatis	bone	metacarpal	OxA-20261	47600	2000	54285	48237	50809	0.15	1.74994	704.747	221.176	Stuart & Lister 2012	This study	PF at LGM not today	beyond loess map extent	ORAU collagen left over from 14C dating
Bob's Cave	UK	50.32	-4.01	BC 54	UPN-329	OxA-V-2748-27	Bos/Bison	Bos primigenius	bone	Astragalus	OxA-V-2748-27C	12510	50	14978	14558	14789	0.16	9.79836	703.376	221.891	Reade et al. 2023	This study	PF at LGM not today	no	Collagen extracted for Reade et al. 2023 (N isotopes also reported in Reade et al. 2023)
Bob's Cave	UK	50.32	-4.01	BC58. Specimen from Tray 2 in box labelled 'B.C 1 - B.C.98 +B.C.103 B.C.123	UPN-316	OxA-V-2748-26	Bos/Bison	Bos primigenius	bone	1st phalanx	OxA-V-2748-26C	12340	50	14791	14174	14363	0.16	11.0615	736.129	232.451	Reade et al. 2023	This study	PF at LGM not today	no	Collagen extracted for Reade et al. 2023 (N isotopes also reported in Reade et al. 2023)
Bob's Cave	UK	50.32	-4.01	BC 107	UPN-326	OxA-V-2798-14	Equus	Equus sp.	tooth	M1/M2 lower	OxA-V-2798-14C	12580	50	15100	14887	14976	0.12	-3.99355	641.997	202.436	Reade et al. 2023	This study	PF at LGM not today	no	Collagen extracted for Reade et al. 2023 (N isotopes also reported in Reade et al. 2023)
Bob's Cave	UK	50.32	-4.01	BC 60. Specimen from Tray 2 in box labelled 'B.C 1 - B.C.98 +B.C.103 B.C.123	UPN-324	OxA-V-2798-13	Equus	Equus sp.	tooth	M1/M2 upper	OxA-V-2798-13C	12490	50	14955	14525	14679	0.13	0.830382	602.322	189.003	Reade et al. 2023	This study	PF at LGM not today	no	Collagen extracted for Reade et al. 2023 (N isotopes also reported in Reade et al. 2023)
Bob's Cave	UK	50.32	-4.01	BC 52. Specimen from Tray 2 in box labelled 'B.C 1 - B.C.98 +B.C.103 B.C.123	UPN-325	OxA-V-2795-12	Equus	Equus sp.	tooth	upper P2/M3	OxA-V-2795-12C	12480	50	14944	14505	14663	0.2	7.19956	341.103	108.261	Reade et al. 2023	This study	PF at LGM not today	no	Collagen extracted for Reade et al. 2023 (N isotopes also reported in Reade et al. 2023)
Bois Laiterie	Belgium	50.36	4.87	V7, V8, V9, V10 BL TT YSS LBS B5C	UPN-380	A/BOI/B/11	Equus	Equus sp.	bone	not specified	OxA-V-3058-25C	12827	33	15381	15222	15309	0.142718	-13.904	845.708	265.75	Reade et al. 2023	This study	PF at LGM not today	yes	Collagen extracted for Reade et al. 2023 (N isotopes also reported in Reade et al. 2023)
Bois Laiterie	Belgium	50.36	4.87	V13.3 YSS	UPN-368	A/BOI/B/10, ID assigned from ZooMS data	Equus	Equidea	bone	not specified	OxA-V-2748-24C	13170	60	15903	15701	15804	0.125268	-11.5077	881.445	277.919	Reade et al. 2023	This study	PF at LGM not today	yes	Collagen extracted for Reade et al. 2023 (N isotopes also reported in Reade et al. 2023)
Bois Laiterie	Belgium	50.36	4.87	BL YSS	UPN-371	A/BOI/B/1	Ovibos	Ovibos moschatus	bone	not specified	OxA-V-3138-13C	13527	35	16376	16245	16314	0.147058	-19.6177	790.142	238.882	Reade et al. 2023	This study	PF at LGM not today	yes	Collagen extracted for Reade et al. 2023 (N isotopes also reported in Reade et al. 2023)
Bois Laiterie	Belgium	50.36	4.87	BL YSS	UPN-381	A/BOI/B/12	Ovibos	Ovibos moschatus	bone	not specified	OxA-V-3138-14C	14601	36	17980	17809	17896	0.137033	-16.1439	847.463	258.739	Reade et al. 2023	This study	PF at LGM not today	yes	Collagen extracted for Reade et al. 2023 (N isotopes also reported in Reade et al. 2023)
Bois Laiterie	Belgium	50.36	4.87	2U USS	UPN-375	A/BOI/B/5	Rangifer	Rangifer tarandus	bone	not specified	OxA-V-3058-19C	14052	35	17238	17013	17087	0.134097	-13.82	847.024	265.26	Reade et al. 2023	This study	PF at LGM not today	yes	Collagen extracted for Reade et al. 2023 (N isotopes also reported in Reade et al. 2023)
Bois Laiterie	Belgium	50.36	4.87	reindeer =9 BL TT	UPN-379	A/BOI/B/9	Rangifer	Rangifer tarandus	bone	not specified	OxA-V-2776-22C	10400	40	12473	12104	12279	0.139014	6.56771	819.965	253.692	Reade et al. 2023	This study	PF at LGM not today	yes	Collagen extracted for Reade et al. 2023 (N isotopes also reported in Reade et al. 2023)
Bolshoy Lyakhovsky Island	Russia	73.33	141.34		OxA-17052		Coelodonta	Coelodonta antiquitatis	bone	radius	OxA-17052	45000	650	48074	46605	47327	0.2	4.36012	564.617	172.378	Stuart & Lister 2012	This study	PF throughout past 50,000 years	NA	ORAU collagen left over from 14C dating
Bolshoy Lyakhovsky Island	Russia	73.33	141.34		OxA-18605		Coelodonta	Coelodonta antiquitatis	bone	bone/aDNA	OxA-18605	13350	50	16165	15975	16064	0.19	6.13953	609.34	187.966	Stuart & Lister 2012	This study	PF throughout past 50,000 years	NA	ORAU collagen left over from 14C dating
Bolshoy Lyakhovsky Island	Russia	73.53	141.63		OxA-17797		Mammuthus	Mammuthus primigenius	tooth	tooth	OxA-17797	28850	150	33618	33105	33328	0.21	5.5327	572.509	173.022	Dehasque et al. 2021	This study	PF throughout past 50,000 years	NA	ORAU collagen left over from 14C dating
Bridged Pot Shelter	UK	51.24	-2.68		UPN-878	A/BPS/B/8, OxA-15282	Rangifer	Rangifer tarandus	bone	not given	OxA-15282	29670	200	34416	34059	34222	0.163603	4.96313	520.233	158.826	Reade et al. 2023	This study	PF at LGM not today	no	Collagen extracted for Stevens 2005 (N isotopes also reported in Reade et al. 2023)
Bryansk Region, Yudinovo	Russia	53.1	33.4		OxA-21005		Mammuthus	Mammuthus primigenius	tooth	tooth	OxA-21005	14840	65	18246	18116	18172	0.15	-5.46778	772.144	236.449	Palkopoulou et al. 2013	This study	PF at LGM not today	yes	ORAU collagen left over from 14C dating
Bryansk Region, Yudinovo	Russia	53.1	33.4		OxA-21006		Mammuthus	Mammuthus primigenius	tooth	tooth	OxA-21006	14910	65	18265	18183	18223	0.16	-5.34436	731.368	229.047	Palkopoulou et al. 2013	This study	PF at LGM not today	yes	ORAU collagen left over from 14C dating
Bryansk Region, Yudinovo	Russia	53.1	33.4	not given	OxA-21004		Mammuthus	Mammuthus primigenius	tooth	tooth fragment	OxA-21004	14715	65	18164	17957	18046	0.14	-3.5	862	254	Palkopoulou et al. 2013	Drucker et al. 2018	PF at LGM not today	yes	NA
Bryansk Region, Yudinovo	Russia	53.1	33.4		OxA-21033		Mammuthus	Mammuthus primigenius	tooth	tooth	OxA-21033	14820	60	18235	18093	18156	0.15	-2.74894	760.041	232.131	Palkopoulou et al. 2013	This study	PF at LGM not today	yes	ORAU collagen left over from 14C dating
Bryansk Region, Yudinovo	Russia	53.1	33.4		OxA-21007		Mammuthus	Mammuthus primigenius	tooth	tooth	OxA-21007	14955	65	18289	18190	18250	0.14	-2.61523	822.116	246.101	Palkopoulou et al. 2013	This study	PF at LGM not today	yes	ORAU collagen left over from 14C dating
Buttentalhöhle	Germany	48.02	8.96		UPN-539	A/BH/B/2, OxA-4981	Equus	Equus sp.	bone	long bone fragment	OxA-4981	12040	120	14054	13795	13925	0.130445	-4.59338	798.555	241.636	Stevens & Hedges 2004	This study	PF at LGM not today	no	Collagen extracted for Stevens & Hedges 2004 (N isotopes also reported in Reade et al. 2023)
Buzhanka	Ukraine	49.24	30.75		BUZHA-02		Mammuthus	Mammuthus primigenius	bone	long bone	GrA-38555	14350	60	17701	17338	17472	0.2	-2.2	713	236	Stupak et al. 2014	Drucker et al. 2018	PF at LGM not today	yes	NA
Bykovsky peninsula	Russia	71.79	129.4	P-90	ARP-118		Mammuthus	M. primigenius	bone	vertebra	GIN-10264	24300	200	28771	28227	28487	0.1	2.4	872	265	Nikolskiy et al. 2011, Schirrmeister et al. 2002	Arppe et al. 2019	PF throughout past 50,000 years	NA	NA
Bykovsky peninsula	Russia	71.79	129.4	P-89	ARP-117		Mammuthus	M. primigenius	bone	tibia	GIN-10263	33800	260	39323	38423	38809	0.2	2.5	795	242	Nikolskiy et al. 2011, Schirrmeister et al. 2002	Arppe et al. 2019	PF throughout past 50,000 years	NA	NA
Bykovsky peninsula	Russia	71.79	129.4	P-83	ARP-111		Mammuthus	M. primigenius	bone	metacarpale	GIN-9908	23100	120	27545	27246	27380	0.1	2.8	769	238	Nikolskiy et al. 2011, Schirrmeister et al. 2002	Arppe et al. 2019	PF throughout past 50,000 years	NA	NA
Bykovsky peninsula	Russia	71.79	129.4	P-62	ARP-91		Mammuthus	M. primigenius	bone	femur	GIN-9887	24800	90	29154	28938	29032	0.2	3.3	699	213	Nikolskiy et al. 2011, Schirrmeister et al. 2002	Arppe et al. 2019	PF throughout past 50,000 years	NA	NA
Bykovsky peninsula	Russia	71.79	129.4	P-86	ARP-114		Mammuthus	M. primigenius	bone	scapula	GIN-10239	14500	110	17857	17470	17689	0.1	3.3	840	260	Nikolskiy et al. 2011, Schirrmeister et al. 2002	Arppe et al. 2019	PF throughout past 50,000 years	NA	NA
Bykovsky peninsula	Russia	71.79	129.4	P-85	ARP-113		Mammuthus	M. primigenius	bone	scapula	GIN-10236	20200	100	24464	24095	24247	0.2	3.3	847	256	Nikolskiy et al. 2011, Schirrmeister et al. 2002	Arppe et al. 2019	PF throughout past 50,000 years	NA	NA
Bykovsky peninsula	Russia	71.79	129.4	P-82	ARP-110		Mammuthus	M. primigenius	bone	carpale	GIN-9880	25500	300	30037	29325	29729	0.2	3.5	751	231	Nikolskiy et al. 2011, Schirrmeister et al. 2002	Arppe et al. 2019	PF throughout past 50,000 years	NA	NA
Bykovsky peninsula	Russia	71.79	129.4	P-84	ARP-112		Mammuthus	M. primigenius	bone	rib	GIN-10234	14600	100	18134	17720	17870	0.1	3.5	847	259	Nikolskiy et al. 2011, Schirrmeister et al. 2002	Arppe et al. 2019	PF throughout past 50,000 years	NA	NA
Bykovsky peninsula	Russia	71.79	129.4	P-87	ARP-115		Mammuthus	M. primigenius	bone	pelvis	GIN-10240	14500	140	17891	17443	17699	0.1	3.5	871	266	Nikolskiy et al. 2011, Schirrmeister et al. 2002	Arppe et al. 2019	PF throughout past 50,000 years	NA	NA
Bykovsky peninsula	Russia	71.79	129.4	P-79	ARP-107		Mammuthus	M. primigenius	bone	mandible	GIN-9893	23050	120	27430	27212	27334	0.2	3.6	765	234	Nikolskiy et al. 2011, Schirrmeister et al. 2002	Arppe et al. 2019	PF throughout past 50,000 years	NA	NA
Bykovsky peninsula	Russia	71.79	129.4	P-75	ARP-104		Mammuthus	M. primigenius	bone	pelvis	GIN-9907	14730	60	18175	17981	18063	0.2	3.9	779	231	Nikolskiy et al. 2011, Schirrmeister et al. 2002	Arppe et al. 2019	PF throughout past 50,000 years	NA	NA
Bykovsky peninsula	Russia	71.79	129.4	P-65	ARP-94		Mammuthus	M. primigenius	tooth	tusk	GIN-9895	34300	320	39810	39176	39483	0.2	4.3	687	210	Nikolskiy et al. 2011, Schirrmeister et al. 2002	Arppe et al. 2019	PF throughout past 50,000 years	NA	NA
Bykovsky peninsula	Russia	71.79	129.4	P-78	ARP-106		Mammuthus	M. primigenius	bone	tibia	GIN-9891	44500	1000	47926	45918	46981	0.2	4.4	825	252	Nikolskiy et al. 2011, Schirrmeister et al. 2002	Arppe et al. 2019	PF throughout past 50,000 years	NA	NA
Bykovsky peninsula	Russia	71.79	129.4	P-74	ARP-103		Mammuthus	M. primigenius	bone	metacarpale	GIN-9881	14340	280	17864	17093	17507	0.2	4.5	611	187	Nikolskiy et al. 2011, Schirrmeister et al. 2002	Arppe et al. 2019	PF throughout past 50,000 years	NA	NA
Bykovsky peninsula	Russia	71.79	129.4	P-71	ARP-100		Mammuthus	M. primigenius	bone	humerus	GIN-9892	35700	700	41384	40108	40791	0.2	4.8	712	218	Nikolskiy et al. 2011, Schirrmeister et al. 2002	Arppe et al. 2019	PF throughout past 50,000 years	NA	NA
Bykovsky peninsula	Russia	71.79	129.4	P-88	ARP-116		Mammuthus	M. primigenius	bone	rib	GIN-10245	29400	600	34510	33172	33822	0.2	5.1	804	243	Nikolskiy et al. 2011, Schirrmeister et al. 2002	Arppe et al. 2019	PF throughout past 50,000 years	NA	NA
Bykovsky peninsula	Russia	71.79	129.4	P-63	ARP-92		Mammuthus	M. primigenius	bone	femur	GIN-9882	26500	230	31020	30437	30730	0.2	5.4	617	191	Nikolskiy et al. 2011, Schirrmeister et al. 2002	Arppe et al. 2019	PF throughout past 50,000 years	NA	NA
Bykovsky peninsula	Russia	71.79	129.4	P-69	ARP-98		Mammuthus	M. primigenius	tooth	tusk	GIN-9890	33610	300	39159	37868	38506	0.2	5.5	655	200	Nikolskiy et al. 2011, Schirrmeister et al. 2002	Arppe et al. 2019	PF throughout past 50,000 years	NA	NA
Bykovsky peninsula	Russia	71.79	129.4	P-81	ARP-109		Mammuthus	M. primigenius	bone	ulna	GIN-9906	28700	800	33919	32011	33017	0.1	5.5	833	249	Nikolskiy et al. 2011, Schirrmeister et al. 2002	Arppe et al. 2019	PF throughout past 50,000 years	NA	NA
Bykovsky peninsula	Russia	71.79	129.4	P-66	ARP-95		Mammuthus	M. primigenius	bone	pelvis	GIN-9896	26700	900	31789	29994	30969	0.2	5.6	687	210	Nikolskiy et al. 2011, Schirrmeister et al. 2002	Arppe et al. 2019	PF throughout past 50,000 years	NA	NA
Bykovsky peninsula	Russia	71.79	129.4	P-80	ARP-108		Mammuthus	M. primigenius	tooth	tusk	GIN-9904	28800	180	33644	32988	33239	0.1	5.7	871	269	Nikolskiy et al. 2011, Schirrmeister et al. 2002	Arppe et al. 2019	PF throughout past 50,000 years	NA	NA
Bykovsky peninsula	Russia	71.79	129.4	P-73	ARP-102		Mammuthus	M. primigenius	bone	pelvis	GIN-9897	34900	400	40496	39664	40085	0.2	5.8	702	213	Nikolskiy et al. 2011, Schirrmeister et al. 2002	Arppe et al. 2019	PF throughout past 50,000 years	NA	NA
Bykovsky peninsula	Russia	71.79	129.4	P-67	ARP-97		Equus	Equus caballus	bone	radius	GIN-9878	31100	400	36030	35153	35499	0.2	-1.9	635	194	Sher et al. 2005	Arppe et al. 2019	PF throughout past 50,000 years	NA	NA
Bykovsky peninsula	Russia	71.79	129.4	P-64	ARP-96		Equus	Equus caballus	bone	humerus	GIN-9876	33000	400	38330	36937	37644	0.2	5.5	701	216	Sher et al. 2005	Arppe et al. 2019	PF throughout past 50,000 years	NA	NA
Bykovsky peninsula	Russia	71.79	129.4	P-70	ARP-105		Equus	Equus caballus	bone	radius fr.	GIN-9879	23850	700	28761	27388	28179	0.2	5.5	819	251	Sher et al. 2005	Arppe et al. 2019	PF throughout past 50,000 years	NA	NA
Bykovsky peninsula	Russia	71.79	129.4	P-68	ARP-99		Equus	Equus caballus	bone	femur	GIN-9873	35800	500	41365	40460	40901	0.2	5.7	604	187	Sher et al. 2005	Arppe et al. 2019	PF throughout past 50,000 years	NA	NA
Bykovsky peninsula	Russia	71.79	129.4	P-60	ARP-93		Equus	Equus caballus	bone	humerus fr.	GIN-9886	32000	1000	37773	35269	36696	0.2	7.3	567	175	Sher et al. 2005	Arppe et al. 2019	PF throughout past 50,000 years	NA	NA
Camiac	France	44.79	-0.27		OxA-23088		Megaloceros	Megaloceros giganteus	bone	bone	OxA-23088	38000	900	42750	41824	42276	0.14	11.4317	818.599	244.936	Lister and Stuart, 2019	This study	No PF past or today	NA	Pre-extracted collagen from ORAU, N isotopes reported in Reade et al. 2023
Cathole	UK	51.59	-4.11	83.99H/312 1959. (III/IV , III J/K Â½ BC 3)	UPN-838	OxA-6314, same sample as OxA-6313	Equus	Equus sp.	tooth	3rd molar	OxA-6314	12180	90	14244	13870	14102	0.139215	6.451	784.631	241.581	Kaagan 2000	This study	PF at LGM not today	no	Pre-extracted collagen from ORAU, N isotopes reported in Reade et al. 2023
Cathole	UK	51.59	-4.11	83.99H/11.2 (H G1/2 5 III) 1958.	UPN-775		Cervus elaphus	Cervus elaphus	bone	tibia	OxA-V-3149-13C	12147	34	14090	14025	14054	0.142285	5.21736	745.11	228.776	Reade et al. 2023	This study	PF at LGM not today	no	Collagen extracted for Reade et al. 2023 (N isotopes also reported in Reade et al. 2023)
Cathole	UK	51.59	-4.11	83.99H/26.1	UPN-778		Cervus elaphus	Cervus elaphus	bone	not given	OxA-V-3149-15C	11896	34	13798	13614	13756	0.175614	8.41318	580.456	174.617	Reade et al. 2023	This study	PF at LGM not today	no	Collagen extracted for Reade et al. 2023 (N isotopes also reported in Reade et al. 2023)
Cathole	UK	51.59	-4.11	83.99H/110.1 1958. (B/C H (G) 6 IV) (Layer B).	UPN-777		Cervus elaphus	Cervus elaphus	bone	ulna	OxA-V-3149-14C	11740	33	13606	13507	13574	0.178017	9.75815	655.592	193.185	Reade et al. 2023	This study	PF at LGM not today	no	Collagen extracted for Reade et al. 2023 (N isotopes also reported in Reade et al. 2023)
Cathole	UK	51.59	-4.11	83.99H/63.2 1958. (B G(H) 7 I/II)	UPN-773		Rangifer	Rangifer based on ZooMS	bone	radius/ulna	OxA-V-3149-11C	10053	29	11701	11404	11568	0.160709	11.3893	740.286	221.582	Reade et al. 2023	This study	PF at LGM not today	no	Collagen extracted for Reade et al. 2023 (N isotopes also reported in Reade et al. 2023)
Cathole	UK	51.59	-4.11	83.99H/303.3 1959. (IV J/K B/C 2).	UPN-809		Rangifer	Rangifer based on ZooMS	bone	1st Phalanx	OxA-V-3149-16C	11012	32	12996	12843	12938	0.168523	12.3772	693.214	210.401	Reade et al. 2023	This study	PF at LGM not today	no	Collagen extracted for Reade et al. 2023 (N isotopes also reported in Reade et al. 2023)
Cathole	UK	51.59	-4.11	83.99H/58.1 1958. (B/C IV G2).	UPN-774		Rangifer	Rangifer based on ZooMS	bone	humerus	OxA-V-3149-12C	28480	180	33035	32218	32626	0.174423	12.6242	630.542	190.934	Reade et al. 2023	This study	PF at LGM not today	no	Collagen extracted for Reade et al. 2023 (N isotopes also reported in Reade et al. 2023)
Cathole	UK	51.59	-4.11	83.99H/379 1959. Bag 23. (II J, 2)	UPN-837		Equus	Equus sp.	tooth	molar	OxA-V-3138-27C	2040	18	2000	1943	1974	0.169849	17.7154	690.32	209.983	This study	This study	PF at LGM not today	no	This study: UCL (AG for isotopes and dating, not ultrafiltered). Collagen extraction method detailed in Reade et al. 2023
Cathole	UK	51.59	-4.11	83.99H/303.2 1959. (IV J/K B/C 2).	UPN-771		Rangifer	Rangifer based on ZooMS	tooth	tooth	OxA-V-3149-10C	10014	29	11612	11360	11500	0.148215	7.45368	792.876	237.554	This study	This study	PF at LGM not today	no	This study: UCL (AG for isotopes, collagen later ultrafiltered for dating) ; Collagen extraction method detailed in Reade et al. 2023
Cathole	UK	51.59	-4.11	83.99H/303.1 1959. (IV J/K B/C 2).	UPN-770		Rangifer	Rangifer based on ZooMS	tooth	tooth	OxA-V-3149-9C	10015	28	11612	11360	11500	0.152738	8.73084	773.088	233.83	This study	This study	PF at LGM not today	no	This study: UCL (AG for isotopes, collagen later ultrafiltered for dating) ; Collagen extraction method detailed in Reade et al. 2023
Chaumois-Boivin	France	46.74	5.68		BLS 1		Rangifer	Rangifer tarandus	bone	phalanx	Ly-3280(Poz)	12530	120	15096	14463	14751	0.16	-1.9	715	217	Bocherens et al. 2011	Drucker et al. 2012	PF at LGM not today	no	NA
Chelm's Combe	UK	51.29	-2.77		UPN-031	A/CC/B/6	Rangifer	Rangifer tarandus	bone	Mandible, right P2-M3	OxA-17831	10480	45	12615	12207	12515	0.15	6.34593	779.484	233.149	Jacobi & Higham 2009a	This study	PF at LGM not today	no	Pre-extracted collagen from ORAU, N isotopes reported in Reade et al. 2023
Chelm's Combe	UK	51.29	-2.77		UPN-033	A/CC/B/4, OxA-1784	Rangifer	Rangifer tarandus	bone	Mandible, left P4-M3	OxA-17829	10150	40	11926	11653	11786	0.14	11.1495	832.016	256.472	Jacobi & Higham 2009a	This study	PF at LGM not today	no	Pre-extracted collagen from ORAU, N isotopes reported in Reade et al. 2023
Chelm's Combe	UK	51.29	-2.77		UPN-037	A/CC/B/8, OxA-1781	Rangifer	Rangifer tarandus	bone	Right metacarpal	OxA-17828	10655	45	12725	12625	12685	0.15	12.0286	778.025	238.716	Jacobi & Higham 2009a	This study	PF at LGM not today	no	Pre-extracted collagen from ORAU, N isotopes reported in Reade et al. 2023
Chelm's Combe	UK	51.29	-2.77	A12 1st MCIII layer 12	UPN-019	A/CC/B/2, OxA-1785, OxA-20691	Equus	Equus sp.	bone	Proximal left metacarpal	OxA-20691	10535	50	12665	12484	12561	0.14	3.34253	824.456	250.08	Reade et al. 2023	This study	PF at LGM not today	no	Pre-extracted collagen from ORAU, N isotopes reported in Reade et al. 2023
Chelm's Combe	UK	51.29	-2.77	CC 1	UPN-839	A/CC/B/1, OxA-6639, OxA-20690	Equus	Equus ferus	bone	1st phalanx	OxA-20690	10830	50	12821	12732	12763	0.139057	7.96821	810.225	250.259	Reade et al. 2023	This study	PF at LGM not today	no	Pre-extracted collagen from ORAU, N isotopes reported in Reade et al. 2023
Chelyabinsk Region	Russia	55	61	CHMG-01 cat# 4130/56	OxA-19681		Megaloceros	Megaloceros giganteus	bone	bone	OxA-19681	8276	36	9404	9141	9275	0.29	-3.60569	419.692	123.314	Lister and Stuart, 2019	This study	PF at LGM not today	beyond loess map extent	ORAU collagen left over from 14C dating
Chernigovo	Russia	48.884	41.305	Krasnobrodsk suite, sands and stratified loams with silt	OxA-13026		Megaloceros	Megaloceros giganteus	bone	left mandible with p4,m1-3	OxA-13026	10055	45	11732	11404	11574	0.18	2.575	528.173	160.986	Lister and Stuart, 2019	This study	No PF past or today	NA	ORAU collagen left over from 14C dating
Cherskiy Town	Russia	68.76	161.63		OxA-18755		Coelodonta	Coelodonta antiquitatis	bone	bone/aDNA	OxA-18755	39140	390	42861	42510	42699	0.16	1.11366	751.879	229.629	Stuart & Lister 2012	This study	PF throughout past 50,000 years	NA	ORAU collagen left over from 14C dating
Chukotka	Russia	68.6	168.24	RS-17	OxA-18498		Mammuthus	Mammuthus primigenius	bone	bone	OxA-18498	49600	1000	54754	52127	53020	0.19	3.82098	627.064	194.517	Nyström et al. 2012	This study	PF throughout past 50,000 years	NA	ORAU collagen left over from 14C dating
Chukotka	Russia	69	168.2	RS-16	OxA-18497		Mammuthus	Mammuthus primigenius	tooth	ivory	OxA-18497	31470	180	36079	35625	35833	0.18	3.98002	637.079	195.183	Nyström et al. 2012	This study	PF throughout past 50,000 years	NA	ORAU collagen left over from 14C dating
Chukotka (Ayon Island)	Russia	69.83	168.65		OxA-20030		Mammuthus	Mammuthus primigenius	bone	bone	OxA-20030	25610	110	30051	29885	29956	0.16	4.70226	758.28	237.095	Nyström et al. 2012	This study	PF throughout past 50,000 years	NA	ORAU collagen left over from 14C dating
Chukotka (Kyttyk Peninsula)	Russia	69.36	168.03		OxA-20036		Mammuthus	Mammuthus primigenius	tooth	tooth	OxA-20036	26240	120	30737	30325	30522	0.25	1.29319	482.907	144.319	Nyström et al. 2012	This study	PF throughout past 50,000 years	NA	ORAU collagen left over from 14C dating
Chukotka (Kyttyk Peninsula)	Russia	69.34	168.09		OxA-20038		Mammuthus	Mammuthus primigenius	tooth	tooth	OxA-20038	47700	750	51736	49232	50570	0.2	2.66903	602.362	183.404	Nyström et al. 2012	This study	PF throughout past 50,000 years	NA	ORAU collagen left over from 14C dating
Chukotka (Kyttyk Peninsula)	Russia	69.2	167.7		OxA-20034		Mammuthus	Mammuthus primigenius	tooth	ivory	OxA-20034	47450	700	51204	48868	50187	0.15	3.02476	772.062	243.152	Nyström et al. 2012	This study	PF throughout past 50,000 years	NA	ORAU collagen left over from 14C dating
Chukotka (Kyttyk Peninsula)	Russia	69.34	168.11		OxA-20039		Mammuthus	Mammuthus primigenius	bone	bone	OxA-20039	46350	650	49664	47996	48804	0.21	6.1322	574.463	172.273	Nyström et al. 2012	This study	PF throughout past 50,000 years	NA	ORAU collagen left over from 14C dating
Chukotka (Kyttyk Peninsula)	Russia	69.34	168.09		OxA-20040		Mammuthus	Mammuthus primigenius	bone	bone	OxA-20040	28680	140	33349	32340	33032	0.28	3.00497	424.097	129.356	Palkopoulou et al. 2013	This study	PF throughout past 50,000 years	NA	ORAU collagen left over from 14C dating
Chukotka (Kyttyk Peninsula)	Russia	69.39	167.52		OxA-20035		Mammuthus	Mammuthus primigenius	tooth	ivory	OxA-20035	33020	190	37736	37042	37483	0.16	3.46263	705.706	224.52	Palkopoulou et al. 2013	This study	PF throughout past 50,000 years	NA	ORAU collagen left over from 14C dating
Chukotka (Kyttyk Peninsula)	Russia	69.36	168.03		OxA-20037		Mammuthus	Mammuthus primigenius	tooth	tooth	OxA-20037	30620	160	35198	34769	34981	0.27	4.57285	446.362	133.407	Palkopoulou et al. 2013	This study	PF throughout past 50,000 years	NA	ORAU collagen left over from 14C dating
Chukotka (Mosey Island)	Russia	69.39	168.13		OxA-20042		Mammuthus	Mammuthus primigenius	tooth	tooth	OxA-20042	19850	90	23954	23778	23873	0.21	1.28065	567.303	172.489	Nyström et al. 2012	This study	PF throughout past 50,000 years	NA	ORAU collagen left over from 14C dating
Chukotka (Nagleynenvaam River)	Russia	69	169.22		OxA-20043		Mammuthus	Mammuthus primigenius	bone	bone	OxA-20043	23610	90	27827	27706	27766	0.19	5.60122	643.812	197.222	Palkopoulou et al. 2013	This study	PF throughout past 50,000 years	NA	ORAU collagen left over from 14C dating
Chukotka (Pineyveem River)	Russia	68.48	169.22		OxA-20048		Mammuthus	Mammuthus primigenius	tooth	ivory	OxA-20048	13935	50	17045	16885	16954	0.19	1.2245	629.379	194.319	Nyström et al. 2012	This study	PF throughout past 50,000 years	NA	ORAU collagen left over from 14C dating
Chukotka (Pineyveem River)	Russia	68.52	169.24		OxA-20046		Mammuthus	Mammuthus primigenius	bone	bone	OxA-20046	12385	45	14811	14297	14471	0.17	2.46095	693.477	219.031	Nyström et al. 2012	This study	PF throughout past 50,000 years	NA	ORAU collagen left over from 14C dating
Chukotka (Pineyveem River)	Russia	68.46	169.21		OxA-20047		Mammuthus	Mammuthus primigenius	tooth	ivory	OxA-20047	26810	110	31120	30986	31046	0.19	4.36978	647.751	202.656	Nyström et al. 2012	This study	PF throughout past 50,000 years	NA	ORAU collagen left over from 14C dating
Chukotka (Rachvakan River)	Russia	69.18	167.37		OxA-20049		Mammuthus	Mammuthus primigenius	bone	bone	OxA-20049	19840	75	23912	23781	23855	0.21	1.00539	582.835	180.709	Nyström et al. 2012	This study	PF throughout past 50,000 years	NA	ORAU collagen left over from 14C dating
Chukotka, Kyttyk Peninsula	Russia	69.35	167.43		OxA-19361		Coelodonta	Coelodonta antiquitatis	tooth	molar	OxA-19361	30560	170	35160	34720	34940	0.18	0.489463	641.795	197.494	Lister & Stuart in prep	This study	PF throughout past 50,000 years	NA	ORAU collagen left over from 14C dating
Chukotka, Kyttyk Peninsula	Russia	69.35	167.43		OxA-19362		Coelodonta	Coelodonta antiquitatis	bone	femur	OxA-19362	28860	160	33640	33108	33342	0.19	2.85611	621.016	191.09	Lister & Stuart in prep	This study	PF throughout past 50,000 years	NA	ORAU collagen left over from 14C dating
Chukotka, Nagleynenvaam River	Russia	69	168		OxA-19363		Coelodonta	Coelodonta antiquitatis	bone	femur	OxA-19363	16405	65	19883	19625	19766	0.18	1.63114	641.77	194.123	Lister & Stuart in prep	This study	PF throughout past 50,000 years	NA	ORAU collagen left over from 14C dating
Chukotka, South, downstream Algan river mouth	Russia	64.4	171.25		OxA-21040		Mammuthus	Mammuthus primigenius	bone	bone	OxA-21040	23320	100	27665	27410	27537	0.2	1.74972	601.592	180.845	Palkopoulou et al. 2013	This study	PF throughout past 50,000 years	NA	ORAU collagen left over from 14C dating
Chukotka, South, downstream Algan river mouth	Russia	64.4	171.25		OxA-21041		Mammuthus	Mammuthus primigenius	tooth	tooth	OxA-21041	25060	110	29499	29128	29288	0.19	5.36747	619.24	188.46	Palkopoulou et al. 2013	This study	PF throughout past 50,000 years	NA	ORAU collagen left over from 14C dating
Chukotka, South, downstream Algan river mouth	Russia	64.4	171.25		OxA-21038		Mammuthus	Mammuthus primigenius	bone	bone	OxA-21038	22750	90	27232	27064	27136	0.2	5.59734	611.596	183.592	Palkopoulou et al. 2013	This study	PF throughout past 50,000 years	NA	ORAU collagen left over from 14C dating
Chukotka, South, downstream Algan river mouth	Russia	64.35	171.27		OxA-21042		Mammuthus	Mammuthus primigenius	tooth	ivory	OxA-21042	34970	230	40427	39854	40133	0.16	5.75521	729.333	226.208	Palkopoulou et al. 2013	This study	PF throughout past 50,000 years	NA	ORAU collagen left over from 14C dating
Chukotka, South, downstream Algan river mouth	Russia	64.4	171.25		OxA-21039		Mammuthus	Mammuthus primigenius	tooth	tooth	OxA-21039	25870	110	30197	30020	30116	0.19	6.53533	642.998	195.109	Palkopoulou et al. 2013	This study	PF throughout past 50,000 years	NA	ORAU collagen left over from 14C dating
Chukotka, South, Kanchalan River	Russia	65.5	177.3		OxA-21036		Mammuthus	Mammuthus primigenius	tooth	tooth	OxA-21036	21040	90	25564	25243	25404	0.19	-3.38044	644.151	193.773	Palkopoulou et al. 2013	This study	PF throughout past 50,000 years	NA	ORAU collagen left over from 14C dating
Chukotka, South, Kanchalan River	Russia	65.5	177.3		OxA-21034		Mammuthus	Mammuthus primigenius	tooth	ivory	OxA-21034	19910	75	24004	23813	23922	0.18	6.60115	675.231	206.601	Palkopoulou et al. 2013	This study	PF throughout past 50,000 years	NA	ORAU collagen left over from 14C dating
Chukotka, South, Kanchalan River	Russia	65.5	177.3		OxA-21035		Mammuthus	Mammuthus primigenius	tooth	tooth	OxA-21035	29050	150	33807	33313	33582	0.18	7.3427	643.004	195.79	Palkopoulou et al. 2013	This study	PF throughout past 50,000 years	NA	ORAU collagen left over from 14C dating
Covalejos	Spain	43.4	-3.93	1999.I4.B.4480	COV27	28691	Cervus elaphus	Cervus elaphus	bone	femur	OxA-32512	34850	600	40622	39446	40046	0.15	8.1	775	276	Jones et al. 2018b	Jones et al. 2018b	No PF past or today	NA	NA
Covalejos	Spain	43.4	-3.93	2002.H5B1.C.5664	COV14	28681	Cervus elaphus	Cervus elaphus	bone	mandible	OxA-32549	34350	600	40425	38853	39475	0.16	11.3	658	222	Jones et al. 2018b	Jones et al. 2018b	No PF past or today	NA	NA
Covalejos	Spain	43.4	-3.93	2002.H5D4.B.505	COV23	28687	Unidentified Cervid	Unidentified Cervid	bone	long bone	OxA-32511	35250	700	41036	39749	40397	0.23	8.2	402	132	Jones et al. 2018b	Jones et al. 2018b	No PF past or today	NA	NA
Dead Man's Cave	UK	53.34	-1.2		UPN-880	A/DMC/B/1	Rangifer	Rangifer tarandus	bone	not given	OxA-5804	10020	80	11699	11334	11529	0.18	6.5	620	189	Hedges et al. 1996	This study	PF at LGM not today	no	Collagen extracted for Stevens 2005 (N isotopes also reported in Reade et al. 2023)
Dead Man's Cave	UK	53.34	-1.2	Cat no: DMC 341 strat 15: 3, DMC1	UPN-683	A/DMC/B/11, OxA-6326, OxA-19167	Equus	Equus sp.	bone	3rd phalanx	OxA-19167	11970	55	14006	13786	13875	0.172949	5.42367	648.232	195.452	Reade et al. 2023	This study	PF at LGM not today	no	Collagen extracted for Stevens et al 2010 (N isotopes also reported in Reade et al. 2023)
Dead Man's Cave	UK	53.34	-1.2	Cat 251 strat 3: 7	UPN-688	A/DMC/B/2, OxA-6327	Equus	Equus sp.	bone	magnum carpal	OxA-19168	11925	50	13994	13614	13790	0.178745	6.36056	633.587	189.225	Reade et al. 2023	This study	PF at LGM not today	no	Collagen extracted for Stevens 2005 (N isotopes also reported in Reade et al. 2023)
Dead Man's Cave	UK	53.34	-1.2	DMC 298, CC8	UPN-919	OxA-21424, UPN-880, OxA-5804 A/DMC/B/1	Rangifer	Rangifer tarandus	bone	phalanx 1	OxA-21424	10305	45	12430	11940	12084	0.167886	5.07549	693.167	214.698	Reade et al. 2023	This study	PF at LGM not today	no	Pre-extracted collagen from ORAU, N isotopes reported in Reade et al. 2023
Deszczowa Cave	Poland	50.5906	19.5406		OxA-11060		Coelodonta	Coelodonta antiquitatis	bone	metapodial	OxA-11060	20800	150	25275	24868	25073	0.13	-8.53174	862.627	262.263	Wojtal 2007	This study	PF at LGM not today	yes	Pre-extracted collagen from ORAU, N isotopes reported in Reade et al. 2023
Dog Hole Fissure	UK	53.26	-1.2	DH 299 A488, Find no. 72, unstratified	UPN-686	A/DHF/B/2	Rangifer	Rangifer tarandus	bone	distal metatarsal	OxA-15294	10325	45	12434	11950	12142	0.16964	7.85002	694.035	209.976	Reade et al. 2023	This study	PF at LGM not today	no	Collagen extracted for Reade et al. 2023 (N isotopes also reported in Reade et al. 2023)
Dolni Vestonice	Czech Republic	48.88	16.67	akc145 1928 Box251Aa	DOL23		Rangifer	Rangifer tarandus	bone	Phalanx	OxA-V-3138-12C	25930	120	30256	30051	30162	0.15	0.1109	726.427	220.344	Reade et al. 2023	This study	PF at LGM not today	no	Collagen extracted for Reade et al. 2023 (N isotopes also reported in Reade et al. 2023)
Duruitoarea Veche	Moldova	48.276	26.656		OxA-11690		Coelodonta	Coelodonta antiquitatis	tooth	lower m3	OxA-11690	38550	500	42676	42277	42485	0.15	0.936138	764.97	228.652	Stuart & Lister 2012	This study	PF at LGM not today	yes	Pre-extracted collagen from ORAU, N isotopes reported in Reade et al. 2023
Duruitory Veche	Moldova	48.633	27.083	MDMG-01	OxA-19630		Megaloceros	Megaloceros giganteus	tooth	tooth	OxA-19630	37050	450	42104	41528	41800	0.15	-0.714985	815.133	236.879	Lister and Stuart, 2019	This study	PF at LGM not today	yes	Pre-extracted collagen from ORAU, N isotopes reported in Reade et al. 2023
Dzhilinda, Vitim River	Russia	53.65	111.93		OxA-17151		Coelodonta	Coelodonta antiquitatis	bone	mandible	OxA-17151	42950	950	46223	44630	45595	0.18	3.0581	652	193.709	Stuart & Lister 2012	This study	PF throughout past 50,000 years	NA	ORAU collagen left over from 14C dating
Eppelsheim	Germany	49.7	8.17		OxA-21002		Mammuthus	Mammuthus primigenius	tooth	tooth	OxA-21002	47500	2300	54371	48091	50703	0.15	0.134454	762.754	238.594	Palkopoulou et al. 2013	This study	PF at LGM not today	yes	ORAU collagen left over from 14C dating
Etiolles, Paris Basin	France	48.6345	2.4777		OxA-12019		Mammuthus	Mammuthus primigenius	bone	bone	OxA-12019	12315	55	14789	14110	14293	0.12	-10.6054	799.036	244.143	Barnes et al. 2007	This study	PF at LGM not today	yes	ORAU collagen left over from 14C dating
Fox Hole Cave	UK	53.19	-1.85	p7696 Section VI 8/10/61	UPN-855	A/FHC/B/3	Equus	Equus sp.	bone	small cunieform	OxA-6310	11920	130	14005	13607	13795	0.186986	8.03928	605.911	181.12	Kaagan 2000	This study	PF at LGM not today	no	Collagen extracted for Stevens & Hedges 2004 (N isotopes also reported in Reade et al. 2023)
Fox Hole Cave	UK	53.19	-1.85	p7697 spit 4 layer D, bag 8 (1972)	UPN-854	A/FHC/B/2	Equus	Equus sp.	bone	1st phalanx	OxA-6311	12030	90	14017	13804	13916	0.182449	6.97411	613.108	187.716	Kaagan 2000	This study	PF at LGM not today	no	Collagen extracted for Stevens & Hedges 2004 (N isotopes also reported in Reade et al. 2023)
Foxhole Cave	UK	51.55	-4.25	2004 29H /FX133 No strat info	UPN-826		Rangifer	Rangifer tarandus	bone	astragalus	OxA-8312	10685	65	12738	12626	12693	0.142808	13.4908	700.212	218.985	ORAU cited in Stevens 2005	This study	PF at LGM not today	no	Collagen extracted for Reade et al. 2023 (N isotopes also reported in Reade et al. 2023)
Foxhole Cave	UK	51.55	-4.25	2004-29.H /FX146 No strat info	UPN-757		Rangifer	Rangifer tarandus	bone	Tibia	OxA-8311	10785	65	12810	12705	12744	0.186219	14.9612	621.331	191.444	ORAU cited in Stevens 2005	This study	PF at LGM not today	no	Collagen extracted for Reade et al. 2023 (N isotopes also reported in Reade et al. 2023)
Gagarino	Russia	52.7491	38.9538		OxA-17800		Mammuthus	Mammuthus primigenius	bone	bone	OxA-17800	21710	90	26013	25873	25951	0.16	3.0776	750.797	222.224	Lister & Stuart in prep	This study	PF at LGM not today	no	ORAU collagen left over from 14C dating
Geißenklösterle	Germany	48.4	9.77	GK 67 IIb 931	P-22980	OxA-21738, previously dated to KIA-8958 31870 +/- 260	Equus	Equus ferus	bone	Humerus	OxA-21742	34900	600	40660	39493	40093	0.14	-0.4	861	258	Higham et al. 2012	Drucker et al. 2015a	PF at LGM not today	yes	NA
Geißenklösterle	Germany	48.4	9.77	GK 26 Ia 18	P-22981	OxA-21739	Mammuthus	Mammuthus primigenius	bone	Rib	OxA-21739	28600	290	33265	32220	32843	0.13	-2.2	885	263	Higham et al. 2012	Drucker et al. 2015a	PF at LGM not today	yes	NA
Geißenklösterle	Germany	48.4	9.77	GK_33742_130_328_It	JK2781	A/GK/B/10, A/GKL/B/54, OXA-21660, OxA-5229	Mammuthus	Mammuthus primigenius	bone	rib, impact marks	OxA-21660	27960	290	32768	31523	31976	0.17	-1.8	665	197	Higham et al. 2012	Drucker et al. 2015a	PF at LGM not today	yes	NA
Geißenklösterle	Germany	48.4	9.77	GK 58 IIb 246	P-22976	OxA-21724, KIA-8960	Mammuthus	Mammuthus primigenius	bone	rib fragment with impact point	OxA-21724	33950	550	39690	38073	38885	0.14	1.9	874	259	Higham et al. 2012	Drucker et al. 2015a	PF at LGM not today	yes	NA
Geißenklösterle	Germany	48.4	9.77	GK IIa 131	P-21810	A/GKL/B/65, OxA-21656, OxA-5707	Equus	Equus ferus	bone	scapula	OxA-21656	33000	500	38495	36883	37701	0.14	0.8	870	259	Higham 2011	Drucker et al. 2015a	PF at LGM not today	yes	NA
Geißenklösterle	Germany	48.4	9.77	G86 IC 122	UPN-960	A/GKL/B/59, P-21815	Rangifer	Rangifer tarandus	bone	unknown	OxA-21661	32900	450	38250	36745	37517	0.202012	-0.939788	540.888	168.373	Higham 2011	This study	PF at LGM not today	yes	Collagen extracted for Stevens 2005 (N isotopes also reported in Reade et al. 2023)
Geißenklösterle	Germany	48.4	9.77	G77 III 627	UPN-961	A/GKL/B/70	Rangifer	Rangifer tarandus	bone	unknown	OxA-21659	35050	600	40791	39643	40225	0.198658	3.58893	586.448	180.957	Higham 2011	This study	PF at LGM not today	yes	Collagen extracted for Stevens 2005 (N isotopes also reported in Reade et al. 2023)
Geißenklösterle	Germany	48.4	9.77	G130 IS 253	UPN-942	A/GKL/B/61, A/GK/B/8, OxA-5227	Equus	Equus sp.	bone	unknown	OxA-5227	28050	550	32981	31550	32289	0.166653	-2.53187	659.075	200.98	Housley et al. 1997	This study	PF at LGM not today	yes	Collagen extracted for Stevens 2005 (N isotopes also reported in Reade et al. 2023)
Geißenklösterle	Germany	48.4	9.77	G78 (2) 22	UPN-958	A/GKL/B/53	Rangifer	Rangifer tarandus	bone	unknown	OxA-6254	13130	100	15906	15605	15751	0.167209	-5.48843	586.066	185.717	Housley et al. 1997	This study	PF at LGM not today	yes	Collagen extracted for Stevens et al 2008 (N isotopes also reported in Reade et al. 2023)
Geißenklösterle	Germany	48.4	9.77	G89 IT 287	UPN-959	A/GKL/B/58, A/GK/B/11	Rangifer	Rangifer tarandus	bone	unknown	OxA-5226	26540	460	31097	30344	30714	0.223524	-3.40447	515.835	156.621	Housley et al. 1997	This study	PF at LGM not today	yes	Collagen extracted for Stevens et al 2008 (N isotopes also reported in Reade et al. 2023)
Geißenklösterle	Germany	48.4	9.77	G79 IT 458	UPN-935	A/GKL/B/24, OxA-V-2216-49	Equus	Equus sp.	bone	Left tibia	OxA-V-2216-49	28560	160	33156	32254	32754	0.176021	-7.93109	645.695	198.482	Reade et al. 2023	This study	PF at LGM not today	yes	Collagen extracted for Stevens 2005 (N isotopes also reported in Reade et al. 2023)
Geißenklösterle	Germany	48.4	9.77	G57 IB 508 / Qu 57, Nr 508	UPN-921	A/GKL/B/1, EQ-GK 318, OxA-V-2216-46,	Equus	Equus sp.	bone	Right tibia	OxA-V-2216-46	38410	340	42545	42277	42417	0.17249	-5.79789	669.28	205.996	Reade et al. 2023	This study	PF at LGM not today	yes	Collagen extracted for Stevens 2005 (N isotopes also reported in Reade et al. 2023)
Geißenklösterle	Germany	48.4	9.77	G99 IA 181	UPN-940	A/GKL/B/30, OxA-V-2218-42, OxA-4856	Equus	Equus sp.	bone	Radius	OxA-V-2218-42	28180	140	32786	31837	32177	0.212879	-5.51151	523.376	158.293	Reade et al. 2023	This study	PF at LGM not today	yes	Collagen extracted for Stevens 2005 (N isotopes also reported in Reade et al. 2023)
Geißenklösterle	Germany	48.4	9.77	G56 IIA 495	UPN-936	A/GKL/B/25, EQ-GK 319	Equus	Equus sp.	bone	humerus (note: Bocherens et al., 2011 published this as tibia)	OxA-V-2216-50	34110	240	39590	39090	39302	0.2	-4.4	502	166	Reade et al. 2023	This study	PF at LGM not today	yes	Collagen extracted for Stevens 2005 (N isotopes also reported in Reade et al. 2023)
Geißenklösterle	Germany	48.4	9.77	G99 IT 557	UPN-934	A/GKL/B/22, EQ-GK 314, OxA-V-2216-48,	Equus	Equus sp.	bone	Left tibia	OxA-V-2216-48	28420	150	32918	32197	32557	0.161541	-3.35675	706.376	218.593	Reade et al. 2023	This study	PF at LGM not today	yes	Collagen extracted for Stevens 2005 (N isotopes also reported in Reade et al. 2023)
Geißenklösterle	Germany	48.4	9.77	G69 572 Iib	UPN-943	A/GKL/B/7, OxA-V-2223-38	Equus	Equus sp.	bone	Right tibia	OxA-V-2223-38	37130	350	42132	41670	41875	0.16952	-1.39025	599.962	187.428	Reade et al. 2023	This study	PF at LGM not today	yes	Collagen extracted for Stevens 2005 (N isotopes also reported in Reade et al. 2023)
Geißenklösterle	Germany	48.4	9.77	G47 IIC 344 / Qu 47, Nr 334	UPN-924	A/GKL/B/12, OxA-V-2216-47	Equus	Equus sp.	bone	Right tibia	OxA-V-2216-47	33400	210	38650	37645	38227	0.172029	0.263412	647.782	202.042	Reade et al. 2023	This study	PF at LGM not today	yes	Collagen extracted for Stevens 2005 (N isotopes also reported in Reade et al. 2023)
Geißenklösterle	Germany	48.4	9.77	G88 IB 644	UPN-938	A/GKL/B/27, OxA-V-2216-41, EQ-GK 316	Equus	Equus sp.	bone	right humerus	OxA-V-2218-41	31290	170	35905	35446	35683	0.209274	2.75743	507.957	157.596	Reade et al. 2023	This study	PF at LGM not today	yes	Collagen extracted for Stevens 2005 (N isotopes also reported in Reade et al. 2023)
Geißenklösterle	Germany	48.4	9.77	G57 III 994	UPN-954	A/GKL/B/44	Rangifer	Rangifer tarandus	bone	Left tibia	OxA-V-2218-44	36090	270	41380	40925	41159	0.211668	3.21136	539.222	164.711	Reade et al. 2023	This study	PF at LGM not today	yes	Collagen extracted for Stevens et al 2008 (N isotopes also reported in Reade et al. 2023)
Geißenklösterle	Germany	48.4	9.77	G88 IB 620	UPN-953	A/GKL/B/43, RA-GK 298, OxA-V-2218-43	Rangifer	Rangifer tarandus	bone	tibia	OxA-V-2218-43	32380	190	36911	36450	36686	0.192728	5.64038	590.352	184.932	Reade et al. 2023	This study	PF at LGM not today	yes	Collagen extracted for Stevens 2005 (N isotopes also reported in Reade et al. 2023)
Gigot 1 and 2, Bretonvillers	France	46.45	5.47		BRT-4		Cervus elaphus	Cervus elaphus	bone	bone	GrA-43939	8645	40	9660	9541	9600	0.2	10.3	603	185	Drucker et al. 2011	Drucker et al. 2011	PF at LGM not today	no	NA
Glen Wyllin	UK	54.28	-4.67		OxA-12118		Megaloceros	Megaloceros giganteus	bone	femur shaft (immature)	OxA-12118	11130	45	13108	12995	13054	0.27	12.3376	446.975	135.22	Lister and Stuart, 2019	This study	PF at LGM not today	no	Pre-extracted collagen from ORAU, N isotopes reported in Reade et al. 2023
Gönnersdorf	Germany	50.48	7.27		OxA-26361		Mammuthus	Mammuthus primigenius	bone	bone	OxA-26361	13250	60	16010	15808	15913	0.15	-12.8074	796.568	228.05	Palkopoulou et al. 2013	This study	PF at LGM not today	yes	ORAU collagen left over from 14C dating
Gönnersdorf	Germany	50.45	7.42	K5 36; 312-12	UPN-1016		Equus	Equus sp.	bone	phalanx I	OxA-V-3129-38C	13086	31	15751	15626	15687	0.16	-14.6278	733.925	215.288	Reade et al. 2023	This study	PF at LGM not today	no	Collagen extracted for Reade et al. 2023 (N isotopes also reported in Reade et al. 2023)
Gönnersdorf	Germany	50.45	7.42	585-39	UPN-1018		Equus	Equus sp.	bone	humerus	OxA-V-3129-39C	13064	31	15726	15601	15661	0.14	-12.6257	811.537	242.041	Reade et al. 2023	This study	PF at LGM not today	no	Collagen extracted for Reade et al. 2023 (N isotopes also reported in Reade et al. 2023)
Gönnersdorf	Germany	50.45	7.42	GO323 PL I/16. SW	UPN-577	A/GON/B/33	Alces	Alces alces	bone	radius, dext.	OxA-15296	12385	65	14817	14249	14488	0.161569	-9.78017	674.804	209.507	Stevens et al. 2009a	This study	PF at LGM not today	no	Collagen extracted for Reade et al. 2023 (N isotopes also reported in Reade et al. 2023)
Gönnersdorf	Germany	50.45	7.42	GO413 PL I 76	UPN-576	A/GON/B/32	Bos/Bison	Bos/bison	bone	unknown	OxA-V-2223-41	13095	55	15786	15614	15699	0.13	-8.8	846	254	Stevens et al. 2009a	This study	PF at LGM not today	no	Collagen extracted for Stevens et al., 2009a (N isotopes also reported in Reade et al. 2023)
Gönnersdorf	Germany	50.45	7.42	GO10C/40 Conc. I	UPN-572	A/GON/B/12	Equus	Equus sp.	bone	metacarpus III	OxA-V-2223-39	13270	55	16030	15835	15940	0.142266	-13.034	795.617	240.679	Stevens et al. 2009a	This study	PF at LGM not today	no	Collagen extracted for Reade et al. 2023 (N isotopes also reported in Reade et al. 2023)
Gönnersdorf	Germany	50.45	7.42	60/71, Niv d (68/53) Mag	UPN-1013	fits with A/GON/B/56	Rangifer	Rangifer tarandus	bone	humerus	OxA-V-3102-28C	13230	38	15963	15807	15883	0.17	-11.7818	680.508	207.19	Stevens et al. 2009a	This study	PF at LGM not today	no	This study: UCL (AF, with solvent & base wash) ; collagen extraction method detailed in Reade et al. 2023
Gönnersdorf	Germany	50.45	7.42	GO524 D/496	UPN-584	A/GON/B/52	Rangifer	Rangifer tarandus	bone	metapodial	OxA-V-2223-43	13075	55	15765	15590	15673	0.166564	-9.88491	693.419	196.502	Stevens et al. 2009a	This study	PF at LGM not today	no	Collagen extracted for Stevens et al., 2009a (N isotopes also reported in Reade et al. 2023)
Gönnersdorf	Germany	50.45	7.42	GO524 YP/479	UPN-582	A/GON/B/45	Rangifer	Rangifer tarandus	bone	metapodium	OxA-15295	13060	60	15755	15565	15653	0.150471	-9.79486	765.446	234.19	Stevens et al. 2009a	This study	PF at LGM not today	no	Collagen extracted for Stevens et al., 2009a (N isotopes also reported in Reade et al. 2023)
Gönnersdorf	Germany	50.45	7.42	Conc II. 150 252	UPN-1027		Mammuthus	Mammuthus primigenius	bone	femur?	OxA-V-3102-25C	13504	39	16351	16212	16282	0.15	-14.9687	775.01	236.109	This study	This study	PF at LGM not today	no	This study: UCL (AF, with solvent & base wash) ; collagen extraction method detailed in Reade et al. 2023
Gough's Cave	UK	51.28	-2.77	M50048	UPN-840	OxA-12104	Equus	Equus sp.	tooth	M1/ M2, inf.	OxA-12104	12495	50	14960	14535	14689	0.144425	-10.193	806.422	248.948	Jacobi & Higham 2009a	This study	PF at LGM not today	no	Pre-extracted collagen from ORAU, N isotopes reported in Reade et al. 2023
Gough's Cave	UK	51.28	-2.77	GC87 191. p5309	UPN-862	A/GNC/B/28, OxA-18068, UPN-845, OxA-4106	Equus	Equus sp.	bone	cervical vetebra	OxA-18068	12520	55	14996	14562	14825	0.1436	-6.3677	740.518	228.782	Jacobi & Higham 2009a	This study	PF at LGM not today	no	Collagen extracted for Stevens et al 2010 (N isotopes also reported in Reade et al. 2023)
Gough's Cave	UK	51.28	-2.77	GC 87 187	UPN-863	A/GNC/B/29, * originally id as red deer	Equus	Equus sp.	bone	cervival vertebrae	OxA-16292	12585	55	15111	14887	14981	0.143581	-5.19661	759.053	233.072	Jacobi & Higham 2009a	This study	PF at LGM not today	no	Collagen extracted for Stevens et al 2010 (N isotopes also reported in Reade et al. 2023)
Gough's Cave	UK	51.28	-2.77		UPN-913	A/GNC/B/25	Rangifer	Rangifer tarandus	bone	bone	OxA-20191	10440	40	12595	12192	12339	0.17641	10.9141	661.184	204.005	Jacobi & Higham 2009a	This study	PF at LGM not today	no	Pre-extracted collagen from ORAU, N isotopes reported in Reade et al. 2023
Gough's Cave	UK	51.28	-2.77	M49797	UPN-844	A/GNC/B/6, OxA-3452	Equus	Equus sp.	bone	left 1st phalange	OxA-18065	12490	55	14960	14514	14678	0.162515	-10.49	698.87	210.943	Jacobi & Higham 2011	This study	PF at LGM not today	no	Pre-extracted collagen from ORAU, N isotopes reported in Reade et al. 2023
Gough's Cave	UK	51.28	-2.77	m50024 18 cave earth / breccua unit spit 18	UPN-861	OXA-17832, A/GNC/B/27, UPN-842, OxA-464	Equus	Equus sp.	bone	distal right metacarpal	OXA-17832	12415	50	14827	14324	14537	0.151312	-5.8754	695.413	208.666	Jacobi & Higham 2011	This study	PF at LGM not today	no	Collagen extracted for Stevens et al 2010 (N isotopes also reported in Reade et al. 2023)
Gough's Cave	UK	51.28	-2.77	Spit 14 M50063a	UPN-305	GT12	Equus	Equus ferus	tooth	Right P2/P3	OxA-V-3058-29C	12227	31	14160	14075	14124	0.14	-14.9498	870.094	267.841	Reade et al. 2023	This study	PF at LGM not today	no	Collagen extracted for Reade et al. 2023 (N isotopes also reported in Reade et al. 2023)
Gough's Old Cave	UK	51.28	-2.77	M17.2/6	UPN-843	A/GOC/B/2, OxA-17834, OxA-21426, OxA-587	Equus	Equus sp.	bone	phalange 1	OxA-21426	12620	55	15135	14956	15038	0.15171	-12.3987	751.259	229.269	Reade et al. 2023	This study	PF at LGM not today	no	Pre-extracted collagen from ORAU, N isotopes reported in Reade et al. 2023
Goyet	Belgium	50.45	5.02	DP2822/17	UPN-972	A/GOY/B/48 and SHN7	Equus	Equus caballus	bone	Maxilla	OxA-V-2798-12C	11760	50	13741	13511	13614	0.137633	-13.2025	811.507	257.71	Reade et al. 2023	This study	PF at LGM not today	yes	Collagen extracted for Reade et al. 2023 (N isotopes also reported in Reade et al. 2023)
Goyet	Belgium	50.45	5.02	DP2822/20	UPN-968	SHN6 and A/GOY/B/47	Equus	Equus caballus	bone	Mandible	OxA-V-2798-18C	12330	50	14792	14154	14327	0.143557	-13.2507	806.073	252.126	Reade et al. 2023	This study	PF at LGM not today	yes	Collagen extracted for Reade et al. 2023 (N isotopes also reported in Reade et al. 2023)
Goyet	Belgium	50.45	5.02	A1 2813.1	UPN-651		Equus	Equus sp.	bone	femur, left proximal	OxA-V-3013-15C	12401	38	14811	14321	14495	0.152511	-15.5607	778.96	237.997	Reade et al. 2023	This study	PF at LGM not today	yes	Collagen extracted for Reade et al. 2023 (N isotopes also reported in Reade et al. 2023)
Goyet	Belgium	50.45	5.02	DP2822/30	UPN-986	A/GOY/B/51 and SHN10	Equus	Equus caballus	bone	Maxilla	OxA-V-2798-10C	12410	50	14823	14322	14526	0.156509	-11.8084	717.2	211.706	Reade et al. 2023	This study	PF at LGM not today	yes	Collagen extracted for Stevens et al 2009b (N isotopes also reported in Reade et al. 2023)
Goyet	Belgium	50.45	5.02	A1 2781.22	UPN-650		Equus	Equus sp.	bone	mandible, with ochre, cutmarks, impact	OxA-V-2748-38C	12420	50	14831	14328	14548	0.170774	-13.2678	686.095	210.579	Reade et al. 2023	This study	PF at LGM not today	yes	Collagen extracted for Reade et al. 2023 (N isotopes also reported in Reade et al. 2023)
Goyet	Belgium	50.45	5.02	2768	UPN-423		Rangifer	Rangifer tarandus	bone	Right metatarsus, diaphysis	OxA-V-2755-36C	12670	50	15182	15018	15105	0.162973	-8.26174	705.368	221.219	Reade et al. 2023	This study	PF at LGM not today	yes	Collagen extracted for Reade et al. 2023 (N isotopes also reported in Reade et al. 2023)
Goyet	Belgium	50.45	5.02	A1 2781.1	UPN-648		Equus	Equus sp.	bone	scapula, left	OxA-V-2755-37C	12670	50	15182	15018	15105	0.158845	-12.5803	742.142	224.422	Reade et al. 2023	This study	PF at LGM not today	yes	Collagen extracted for Reade et al. 2023 (N isotopes also reported in Reade et al. 2023)
Goyet	Belgium	50.45	5.02	2818	UPN-439		Rangifer	Rangifer tarandus	bone	Right metatarsus, diaphysis	OxA-V-3013-12C	12676	35	15180	15041	15113	0.163673	-6.23187	710.943	210.729	Reade et al. 2023	This study	PF at LGM not today	yes	Collagen extracted for Reade et al. 2023 (N isotopes also reported in Reade et al. 2023)
Goyet	Belgium	50.45	5.02	2778	UPN-408		Rangifer	Rangifer tarandus	bone	Right MT, diaphysis	OxA-V-2748-34C	12720	50	15253	15096	15170	0.150025	-5.65425	762.397	236.792	Reade et al. 2023	This study	PF at LGM not today	yes	Collagen extracted for Reade et al. 2023 (N isotopes also reported in Reade et al. 2023)
Goyet	Belgium	50.45	5.02	A1 2780.9d	UPN-645		Equus	Equus sp.	bone	rib, right, with ochre and evidence of impact	OxA-V-2748-37C	12720	50	15253	15096	15170	0.165581	-14.2055	731.062	224.281	Reade et al. 2023	This study	PF at LGM not today	yes	Collagen extracted for Reade et al. 2023 (N isotopes also reported in Reade et al. 2023)
Goyet	Belgium	50.45	5.02	2768	UPN-422		Rangifer	Rangifer tarandus	bone	Right metatarsus, diaphysis	OxA-V-2755-35C	12770	60	15316	15132	15232	0.169349	-11.0794	684.11	206.495	Reade et al. 2023	This study	PF at LGM not today	yes	Collagen extracted for Reade et al. 2023 (N isotopes also reported in Reade et al. 2023)
Goyet	Belgium	50.45	5.02	A1 2832.3	UPN-655		Equus	Equus sp.	bone	metacarpal, right proximal, ochre and cut marks	OxA-V-2223-48	12775	55	15316	15143	15237	0.139791	-14.2666	850.726	261.906	Stevens et al. 2009b	This study	PF at LGM not today	yes	Collagen extracted for Reade et al. 2023 (N isotopes also reported in Reade et al. 2023)
Goyet	Belgium	50.45	5.02	A2 2894.149	UPN-660		Equus	Equus sp.	tooth	UP2, right	OxA-V-3013-20C	12799	38	15331	15186	15266	0.144504	-13.3863	838.071	264.441	Reade et al. 2023	This study	PF at LGM not today	yes	Collagen extracted for Reade et al. 2023 (N isotopes also reported in Reade et al. 2023)
Goyet	Belgium	50.45	5.02	DP2778/49	UPN-433	Â A/GOY/B/15	Rangifer	Rangifer tarandus	bone	canon ant.	OxA-V-2223-46	12810	55	15379	15175	15289	0.213654	7.30187	306.527	100.127	Reade et al. 2023	This study	PF at LGM not today	yes	Collagen extracted for Stevens et al 2008 (N isotopes also reported in Reade et al. 2023)
Goyet	Belgium	50.45	5.02	DP2768	UPN-434	Â A/GOY/B/35	Rangifer	Rangifer tarandus	bone	canon. post.	OxA-V-2223-50	12875	55	15492	15285	15391	0.166952	-6.63041	663.244	200.079	Reade et al. 2023	This study	PF at LGM not today	yes	Collagen extracted for Stevens et al 2008 (N isotopes also reported in Reade et al. 2023)
Goyet	Belgium	50.45	5.02	A2 2894.150	UPN-661		Equus	Equus sp.	tooth	UP2, right	OxA-V-3013-21C	12970	38	15619	15432	15519	0.154924	-13.4343	779.841	243.448	Reade et al. 2023	This study	PF at LGM not today	yes	Collagen extracted for Reade et al. 2023 (N isotopes also reported in Reade et al. 2023)
Goyet	Belgium	50.45	5.02	2779	UPN-412		Rangifer	Rangifer tarandus	bone	Left humerus , diaphysis	OxA-V-3014-32C	15570	45	18886	18815	18852	0.166729	-11.4978	686.191	205.476	Reade et al. 2023	This study	PF at LGM not today	yes	Collagen extracted for Reade et al. 2023 (N isotopes also reported in Reade et al. 2023)
Goyet	Belgium	50.45	5.02	2778	UPN-409		Rangifer	Rangifer tarandus	bone	Left Tibia, diaphysis	OxA-V-3014-29Â	16885	45	20481	20360	20415	0.160442	-12.8248	747.77	217.693	Reade et al. 2023	This study	PF at LGM not today	yes	Collagen extracted for Reade et al. 2023 (N isotopes also reported in Reade et al. 2023)
Goyet	Belgium	50.45	5.02	A1 2780.13g	UPN-646		Equus	Equus sp.	bone	rib, left, with ochre and cutmarks	OxA-V-3013-14C	22750	90	27232	27064	27136	0.145051	-9.88711	830.387	255.938	Reade et al. 2023	This study	PF at LGM not today	yes	Collagen extracted for Reade et al. 2023 (N isotopes also reported in Reade et al. 2023)
Goyet	Belgium	50.45	5.02	2768	UPN-420		Rangifer	Rangifer tarandus	bone	Left metatarsus, diaphysis	OxA-V-3026-28C	23030	90	27359	27230	27304	0.17281	-8.03163	656.144	195.693	Reade et al. 2023	This study	PF at LGM not today	yes	Collagen extracted for Reade et al. 2023 (N isotopes also reported in Reade et al. 2023)
Goyet	Belgium	50.45	5.02	2768	UPN-419		Rangifer	Rangifer tarandus	bone	Left metacarpus, diaphysis	OxA-V-2754-53C	23600	120	27846	27678	27757	0.176574	-9.13874	656.757	195.788	Reade et al. 2023	This study	PF at LGM not today	yes	Collagen extracted for Reade et al. 2023 (N isotopes also reported in Reade et al. 2023)
Goyet	Belgium	50.45	5.02	DP2822/23	UPN-971	SHN9 And A/GOY/B/50	Equus	Equus caballus	bone	Maxilla	OxA-V-2798-11C	23710	120	27914	27725	27831	0.133597	-12.2485	868.787	270.615	Reade et al. 2023	This study	PF at LGM not today	yes	Collagen extracted for Reade et al. 2023 (N isotopes also reported in Reade et al. 2023)
Goyet	Belgium	50.45	5.02		OxA-11292		Mammuthus	Mammuthus primigenius	bone	bone	OxA-11292	23940	180	28299	27832	28113	0.15	-10.8246	830.614	247.337	Barnes et al. 2007	This study	PF at LGM not today	yes	ORAU collagen left over from 14C dating
Goyet	Belgium	50.45	5.02	Level 1 2813 4	UPN-502	A/GOY/B/7	Equus	Equus caballus	bone	femur	OxA-V-3149-27C	24020	100	28311	27926	28150	0.163275	-7.00912	672.137	204.222	Reade et al. 2023	This study	PF at LGM not today	yes	Collagen extracted for Germonpre et al 2009 (N isotopes also reported in Reade et al. 2023)
Goyet	Belgium	50.45	5.02	A2 2809.18	UPN-659		Equus	Equus sp.	bone	radius, left distal with ochre	OxA-V-2755-38C	25080	140	29570	29141	29374	0.14847	2.22052	826.478	257.99	Reade et al. 2023	This study	PF at LGM not today	yes	Collagen extracted for Reade et al. 2023 (N isotopes also reported in Reade et al. 2023)
Goyet	Belgium	50.45	5.02	Level 2 2809	UPN-404	A/GOY/B/33	Equus	Equus caballus	bone	femur	OxA-V-2754-52C	25800	130	30159	29975	30075	0.160727	0.883502	745.725	229.404	Reade et al. 2023	This study	PF at LGM not today	yes	Collagen extracted for Reade et al. 2023 (N isotopes also reported in Reade et al. 2023)
Goyet	Belgium	50.45	5.02	2778	UPN-410		Rangifer	Rangifer tarandus	bone	Left Tibia, diaphysis	OxA-V-3014-30C	26930	130	31161	31038	31096	0.177318	1.75914	656.615	198.5	Reade et al. 2023	This study	PF at LGM not today	yes	Collagen extracted for Reade et al. 2023 (N isotopes also reported in Reade et al. 2023)
Goyet	Belgium	50.45	5.02	A2 2809.15	UPN-658		Equus	Equus sp.	bone	radius, left distal	OxA-V-3013-19C	27090	150	31232	31079	31165	0.147005	2.13691	822.676	256.778	Reade et al. 2023	This study	PF at LGM not today	yes	Collagen extracted for Reade et al. 2023 (N isotopes also reported in Reade et al. 2023)
Goyet	Belgium	50.45	5.02		OxA-12119		Coelodonta	Coelodonta	tooth	upper M3	OxA-12119	28470	140	33010	32221	32604	0.13	-0.170981	896.783	284.436	Stuart & Lister 2012	This study	PF at LGM not today	yes	Pre-extracted collagen from ORAU, N isotopes reported in Reade et al. 2023
Goyet	Belgium	50.45	5.02	2212	UPN-436		Rangifer	Rangifer tarandus	bone	Right metacarpus, diaphysis	OxA-V-3071-33C	28765	165	33604	32942	33183	0.170058	-0.676824	686.392	206.745	Reade et al. 2023	This study	PF at LGM not today	yes	Collagen extracted for Reade et al. 2023 (N isotopes also reported in Reade et al. 2023)
Goyet	Belgium	50.45	5.02	A1 2813.25	UPN-652		Equus	Equus sp.	bone	astragalus, left	OxA-V-3013-17C	29100	200	33920	33330	33641	0.165003	-2.09649	725.913	225.132	Reade et al. 2023	This study	PF at LGM not today	yes	Collagen extracted for Reade et al. 2023 (N isotopes also reported in Reade et al. 2023)
Goyet	Belgium	50.45	5.02	2212	UPN-438		Rangifer	Rangifer tarandus	bone	Left metatarsus, diaphysis	OxA-V-3022-18C	29250	160	34112	33644	33841	0.167595	0.123834	695.383	208.447	Reade et al. 2023	This study	PF at LGM not today	yes	Collagen extracted for Reade et al. 2023 (N isotopes also reported in Reade et al. 2023)
Goyet	Belgium	50.45	5.02		OxA-12120		Coelodonta	Coelodonta	tooth	lower molar	OxA-12120	29330	160	34158	33741	33928	0.14	-0.302907	873.324	274.609	Stuart & Lister 2012	This study	PF at LGM not today	yes	Pre-extracted collagen from ORAU, N isotopes reported in Reade et al. 2023
Goyet	Belgium	50.45	5.02	A2 2809.14	UPN-657		Equus	Equus sp.	bone	femur, right proximal	OxA-V-2223-49	29420	170	34225	33830	34013	0.146822	1.51553	833.385	259.64	Stevens et al. 2009b	This study	PF at LGM not today	yes	Collagen extracted for Reade et al. 2023 (N isotopes also reported in Reade et al. 2023)
Goyet	Belgium	50.45	5.02	2211	UPN-435		Rangifer	Rangifer tarandus	bone	Left metacarpus, diaphysis	OxA-V-3022-17C	30870	210	35451	34901	35220	0.17369	2.36946	663.604	201.142	Reade et al. 2023	This study	PF at LGM not today	yes	Collagen extracted for Reade et al. 2023 (N isotopes also reported in Reade et al. 2023)
Goyet	Belgium	50.45	5.02	2211	UPN-432		Rangifer	Rangifer tarandus	bone	metatarsus, diaphysis	OxA-V-3022-16C	30950	210	35604	34944	35318	0.183094	5.70596	642.013	190.813	Reade et al. 2023	This study	PF at LGM not today	yes	Collagen extracted for Reade et al. 2023 (N isotopes also reported in Reade et al. 2023)
Goyet	Belgium	50.45	5.02	2211	UPN-431		Rangifer	Rangifer tarandus	bone	Right metatarsus, diaphysis	OxA-V-3022-15C	31040	210	35718	35185	35427	0.182508	3.48844	643.616	193.686	Reade et al. 2023	This study	PF at LGM not today	yes	Collagen extracted for Reade et al. 2023 (N isotopes also reported in Reade et al. 2023)
Goyet	Belgium	50.45	5.02		OxA-11784		Megaloceros	Megaloceros giganticus	tooth	tooth	OxA-11784	31590	200	36183	35718	35936	0.15	-1.72533	789.162	234.455	Stuart et al. 2004	This study	PF at LGM not today	yes	Pre-extracted collagen from ORAU, N isotopes reported in Reade et al. 2023
Goyet	Belgium	50.45	5.02	A1 2832.2	UPN-654		Equus	Equus sp.	bone	metacarpal, left proximal 1/2	OxA-V-2223-44	31750	200	36329	35895	36104	0.204013	1.867	429.517	137.456	Stevens et al. 2009b	This study	PF at LGM not today	yes	Collagen extracted for Reade et al. 2023 (N isotopes also reported in Reade et al. 2023)
Goyet	Belgium	50.45	5.02		OxA-11294		Mammuthus	Mammuthus primigenius	bone	bone	OxA-11294	32280	280	36893	36313	36625	0.16	0.537933	791.929	229.382	Palkopoulou et al. 2013	This study	PF at LGM not today	yes	ORAU collagen left over from 14C dating
Goyet	Belgium	50.45	5.02		OxA-11293		Mammuthus	Mammuthus primigenius	bone	bone	OxA-11293	32840	340	37769	36644	37339	0.14	0.671004	823.039	241.046	Palkopoulou et al. 2013	This study	PF at LGM not today	yes	ORAU collagen left over from 14C dating
Goyet	Belgium	50.45	5.02	2778	UPN-407		Rangifer	Rangifer tarandus	bone	Right MC, diaphysis	OxA-V-3014-28C	33500	280	38962	37800	38365	0.141491	8.09704	812.221	252.074	Reade et al. 2023	This study	PF at LGM not today	yes	Collagen extracted for Reade et al. 2023 (N isotopes also reported in Reade et al. 2023)
Goyet	Belgium	50.45	5.02	A1 2380.27	UPN-644		Equus	Equus sp.	tooth	tooth LP3/P4, left	OxA-V-3071-32C	33670	290	39218	38150	38594	0.156868	1.83068	743.221	230.158	Reade et al. 2023	This study	PF at LGM not today	yes	Collagen extracted for Reade et al. 2023 (N isotopes also reported in Reade et al. 2023)
Goyet	Belgium	50.45	5.02	2768	UPN-421		Rangifer	Rangifer tarandus	bone	Left metatarsus, diaphysis	OxA-V-2748-35C	34840	360	40415	39640	40024	0.171549	6.74761	684.497	196.512	Reade et al. 2023	This study	PF at LGM not today	yes	Collagen extracted for Reade et al. 2023 (N isotopes also reported in Reade et al. 2023)
Goyet	Belgium	50.45	5.02	2769 6 Level 2	UPN-493	A/GOY/B/29	Bos/Bison	Bison europ.	bone	canon ant.	OxA-V-3155-9C	35080	400	40643	39810	40242	0.139686	9.13574	768.144	234.203	Reade et al. 2023	This study	PF at LGM not today	yes	Collagen extracted for Germonpre et al 2009 (N isotopes also reported in Reade et al. 2023)
Goyet	Belgium	50.45	5.02	2818	UPN-440		Rangifer	Rangifer tarandus	bone	Right metatarsus, diaphysis	OxA-V-3013-13C	36000	450	41454	40667	41084	0.165146	8.46714	708.295	211.462	Reade et al. 2023	This study	PF at LGM not today	yes	Collagen extracted for Reade et al. 2023 (N isotopes also reported in Reade et al. 2023)
Goyet	Belgium	50.45	5.02	2768	UPN-424		Rangifer	Rangifer tarandus	bone	Left metatarsus , diaphysis	OxA-V-2748-36C	36150	450	41615	40840	41213	0.160889	2.42879	708.981	218.346	Reade et al. 2023	This study	PF at LGM not today	yes	Collagen extracted for Reade et al. 2023 (N isotopes also reported in Reade et al. 2023)
Goyet	Belgium	50.45	5.02	2204	UPN-427		Rangifer	Rangifer tarandus	tooth	Left P4, root	OxA-V-3014-39C	36350	400	41727	41080	41377	0.153273	8.29374	749.876	232.682	This study	This study	PF at LGM not today	yes	This study: UCL (AG for isotopes, collagen later ultrafiltered for dating) ; Collagen extraction method detailed in Reade et al. 2023
Goyet	Belgium	50.45	5.02	2204	UPN-429		Rangifer	Rangifer tarandus	tooth	Right P4, root	OxA-V-3022-14C	36510	390	41806	41213	41492	0.150934	8.41474	778.498	236.545	This study	This study	PF at LGM not today	yes	This study: UCL (AG for isotopes, collagen later ultrafiltered for dating) ; Collagen extraction method detailed in Reade et al. 2023
Goyet	Belgium	50.45	5.02	2204	UPN-428		Rangifer	Rangifer tarandus	tooth	Left P4, root	OxA-V-3014-40C	37250	450	42216	41687	41921	0.15494	5.65135	749.329	230.473	This study	This study	PF at LGM not today	yes	This study: UCL (AG for isotopes, collagen later ultrafiltered for dating) ; Collagen extraction method detailed in Reade et al. 2023
Goyet	Belgium	50.45	5.02	2779	UPN-411		Rangifer	Rangifer tarandus	bone	Left mandible, root p2/p3	OxA-V-3014-31C	37700	500	42377	41941	42144	0.160802	9.46962	726.561	220.066	Reade et al. 2023	This study	PF at LGM not today	yes	Collagen extracted for Reade et al. 2023 (N isotopes also reported in Reade et al. 2023)
Goyet	Belgium	50.45	5.02	2212	UPN-437		Rangifer	Rangifer tarandus	bone	Right metatarsus, diaphysis	OxA-V-3071-34C	37750	500	42391	41966	42167	0.174824	10.3071	667.316	200.185	Reade et al. 2023	This study	PF at LGM not today	yes	Collagen extracted for Reade et al. 2023 (N isotopes also reported in Reade et al. 2023)
Goyet	Belgium	50.45	5.02	2204	UPN-426		Rangifer	Rangifer tarandus	tooth	Left P4, root	OxA-V-3014-38C	37950	450	42429	42078	42253	0.171463	7.14319	675.367	206.834	This study	This study	PF at LGM not today	yes	This study: UCL (AG for isotopes, collagen later ultrafiltered for dating) ; Collagen extraction method detailed in Reade et al. 2023
Goyet	Belgium	50.45	5.02	A1 2832.1	UPN-653		Equus	Equus sp.	bone	metatarsal, left proximal	OxA-V-3013-18C	40900	750	44439	43260	43904	0.156317	-0.469604	682.804	214.743	Reade et al. 2023	This study	PF at LGM not today	yes	Collagen extracted for Reade et al. 2023 (N isotopes also reported in Reade et al. 2023)
Goyet	Belgium	50.45	5.02	A2 2894.157	UPN-664		Equus	Equus sp.	tooth	UP2, right	OxA-V-3013-26C	40900	750	44439	43260	43904	0.149034	1.1042	804.751	253.418	Reade et al. 2023	This study	PF at LGM not today	yes	Collagen extracted for Reade et al. 2023 (N isotopes also reported in Reade et al. 2023)
Goyet	Belgium	50.45	5.02	A2 2894.156	UPN-663		Equus	Equus sp.	tooth	UP2, right	OxA-V-3013-25C	41500	800	45035	43434	44391	0.158358	6.71317	770.286	242.927	Reade et al. 2023	This study	PF at LGM not today	yes	Collagen extracted for Reade et al. 2023 (N isotopes also reported in Reade et al. 2023)
Gravière I/II nord, Hangest-sur-Somme	France	49.9817	2.0658	none	HII-2		Cervus elaphus	Cervus elaphus	bone	Talus L	Erl-9393	9410	65	10724	10520	10641	0.14	6.8	754	238	Drucker et al. 2020	Drucker et al. 2020	PF at LGM not today	no	NA
Gremyachevo	Russia	59.91	56.35		OxA-18604		Coelodonta	Coelodonta antiquitatis	bone	ulna/aDNA	OxA-18604	12595	45	15105	14935	15007	0.16	0.927288	713.925	221.004	Stuart & Lister 2012	This study	PF at LGM not today	beyond loess map extent	ORAU collagen left over from 14C dating
Grotte Grappin/ Saint-Vincent's	France	46.76	5.52	44J-sect1/1998-3-384	ARL 6		Rangifer	Rangifer tarandus	bone	astragalus	Ly-3878(GrA)	13640	60	16572	16365	16476	0.16	-5.8	721	230	Bocherens et al. 2011	Drucker et al. 2012	PF at LGM not today	yes	NA
Grotte Grappin/ Saint-Vincent's	France	46.76	5.52	30-R-2/1998-3-30	ARL 3		Rangifer	Rangifer tarandus	bone	metapodial	Ly-3160(Poz)	16840	110	20491	20232	20353	0.18	-0.3	566	185	Cupillard & Welté 2006	Drucker et al. 2012	PF at LGM not today	yes	NA
Grotte Grappin/ Saint-Vincent's	France	46.76	5.52	322-J1/1998-3-105	ARL 7		Rangifer	Rangifer tarandus	bone	metapodial	Ly-3877(GrA)	15260	70	18688	18323	18456	0.15	-3.7	725	239	Drucker et al. 2012	Drucker et al. 2012	PF at LGM not today	yes	NA
Grotte Grappin/ Saint-Vincent's	France	46.76	5.52	83 J1/1998-3-364	ARL 12		Rangifer	Rangifer tarandus	bone	astragalus	Ly-4869(GrA)	14850	50	18242	18155	18191	0.23	0.8	473	137	Drucker et al. 2012	Drucker et al. 2012	PF at LGM not today	yes	NA
Grotto Bobylek, Urals	Russia	56.32	57.65	cave sediments	OxA-11063		Megaloceros	Megaloceros giganteus	tooth	molar root	OxA-11063	9960	55	11603	11264	11401	0.18	4.40603	653.846	195.885	Lister and Stuart, 2019	This study	PF at LGM not today	beyond loess map extent	ORAU collagen left over from 14C dating
Grotto Bobylek, Urals	Russia	56.32	57.65		OxA-11296		Coelodonta	Coelodonta antiquitatis	bone	mandible	OxA-11296	14630	80	18113	17820	17936	0.15	0.428185	788.145	242.838	Stuart & Lister 2012	This study	PF at LGM not today	beyond loess map extent	ORAU collagen left over from 14C dating
Grotto Bobylek, Urals	Russia	56.32	57.65		OxA-11297		Coelodonta	Coelodonta antiquitatis	bone	sacrum	OxA-11297	23700	140	27940	27706	27833	0.14	0.681788	825.712	252.404	Stuart & Lister 2012	This study	PF at LGM not today	beyond loess map extent	ORAU collagen left over from 14C dating
Grotto Cheremuhova 1-1, Urals	Russia	60.4	60.05		OxA-10926		Coelodonta	Coelodonta antiquitatis	bone	thoracic vertebra	OxA-10926	26430	180	30917	30431	30677	0.13	2.574	893.48	271.051	Stuart & Lister 2012	This study	PF at LGM not today	beyond loess map extent	ORAU collagen left over from 14C dating
Grotto Cheremuhovo 1-4, Urals	Russia	60.04	60.67		OxA-10911		Mammuthus	Mammuthus primigenius	bone	bone	OxA-10911	42700	800	45885	44656	45342	0.17	4.65255	686.005	209.187	Bachura & Kosintsev 2007	This study	PF at LGM not today	beyond loess map extent	ORAU collagen left over from 14C dating
Grotto Dirovatye Rebra, Urals	Russia	58.22	58.37		OxA-10913		Mammuthus	Mammuthus primigenius	bone	bone	OxA-10913	12740	65	15289	15099	15195	0.15	1.37256	805.169	248.834	Chlachula 2010	This study	PF at LGM not today	beyond loess map extent	ORAU collagen left over from 14C dating
Grotto Holodny, Urals	Russia	58.67	57.57		OxA-10927		Coelodonta	Coelodonta antiquitatis	bone	skull fragment/aDNA	OxA-10927	16370	80	19850	19615	19742	0.14	-0.255889	808.27	243.465	Lorenzen et al. 2011	This study	PF at LGM not today	beyond loess map extent	ORAU collagen left over from 14C dating
Grotto Ivaka, Urals	Russia	59.25	57.48		OxA-10925		Coelodonta	Coelodonta antiquitatis	bone	femur	OxA-10925	26730	200	31125	30841	30960	0.14	1.51758	845.657	254.999	Stuart & Lister 2012	This study	PF at LGM not today	beyond loess map extent	ORAU collagen left over from 14C dating
Grotto Kumishsky, Urals	Russia	58.2	58.17		OxA-10929		Coelodonta	Coelodonta antiquitatis	bone	scapula/aDNA	OxA-10929	33670	300	39221	38133	38588	0.14	0.883212	828.198	246.728	Lorenzen et al. 2011	This study	PF at LGM not today	beyond loess map extent	ORAU collagen left over from 14C dating
Grotto Nikolsky, Urals	Russia	60.4	60.05		OxA-10920		Coelodonta	Coelodonta antiquitatis	bone	scapula/aDNA	OxA-10920	14450	75	17762	17460	17623	0.15	0.450946	796.717	234.749	Lorenzen et al. 2011	This study	PF at LGM not today	beyond loess map extent	ORAU collagen left over from 14C dating
Grotto Nosorogov, Urals	Russia	59.37	57.75		OxA-11301		Coelodonta	Coelodonta antiquitatis	bone	cervical vertebra	OxA-11301	46300	700	49694	47911	48769	0.16	1.67591	754.01	231.843	Stuart & Lister 2012	This study	PF at LGM not today	beyond loess map extent	ORAU collagen left over from 14C dating
Grotto Rasik, Urals	Russia	59.08	57.33		OxA-10931		Coelodonta	Coelodonta antiquitatis	bone	tibia	OxA-10931	31540	260	36166	35621	35883	0.14	2.37905	828.424	253.906	Rey-Iglesia et al. 2021	This study	PF at LGM not today	beyond loess map extent	ORAU collagen left over from 14C dating
Grotto Sikiyaz - Tamak 7	Russia	55.18	55.3	UR.49	OxA-12099		Megaloceros	Megaloceros giganteus	bone	bone	OxA-12099	10355	45	12452	12045	12217	0.18	5.43311	669.556	200.13	Lister & Stuart 2019	This study	PF at LGM not today	beyond loess map extent	ORAU collagen left over from 14C dating
Grotto Sikiyaz - Tamak 7	Russia	55.18	58.63		OxA-11069		Coelodonta	Coelodonta antiquitatis	bone	phalanx I/aDNA	OxA-11069	15370	80	18810	18389	18700	0.15	1.34179	750.637	232.119	Stuart & Lister 2012	This study	PF at LGM not today	beyond loess map extent	ORAU collagen left over from 14C dating
Grotto Sur'ya	Russia	59.1	57.31		OxA-10914		Mammuthus	Mammuthus primigenius	bone	bone	OxA-10914	34470	350	39981	39272	39656	0.17	3.76254	732.362	226.451	Ponomarev et al. 2013	This study	PF at LGM not today	beyond loess map extent	ORAU collagen left over from 14C dating
Grotto Surya 3, Urals	Russia	61.2	58.38		OxA-11300		Coelodonta	Coelodonta antiquitatis	bone	humerus	OxA-11300	45700	900	49055	46871	48151	0.15	2.29334	789.261	240.026	Stuart & Lister 2012	This study	PF at LGM not today	beyond loess map extent	ORAU collagen left over from 14C dating
Grotto Surya 4, Urals	Russia	61.2	58.38		OxA-11299		Coelodonta	Coelodonta antiquitatis	bone	metapodial	OxA-11299	14815	75	18234	18060	18137	0.16	1.29119	755.714	229.865	Stuart & Lister 2012	This study	PF at LGM not today	beyond loess map extent	ORAU collagen left over from 14C dating
Grotto Surya 7, Urals	Russia	61.2	58.38		OxA-11350		Coelodonta	Coelodonta antiquitatis	bone	ulna/aDNA	OxA-11350	14845	75	18250	18101	18168	0.15	-0.141626	808.035	244.69	Lorenzen et al. 2011	This study	PF at LGM not today	beyond loess map extent	ORAU collagen left over from 14C dating
Höhlefels	Germany	48.38	9.76		UPN-537	A/HF/B/4, OxA-4978	Equus	Equus sp.	bone	not given	OxA-4978	27150	600	31922	30491	31335	0.166303	-4.38338	662.887	204.702	Stevens & Hedges 2004	This study	PF at LGM not today	yes	Collagen extracted for Stevens & Hedges 2004 (N isotopes also reported in Reade et al. 2023)
Höhlefels	Germany	48.38	9.76		UPN-536	OxA-4977, A/HF/B/3	Rangifer	Rangifer tarandus	bone	not given	OxA-4977	13350	140	16265	15851	16064	0.161448	-6.04547	634.106	203.66	Stevens et al. 2008	This study	PF at LGM not today	yes	Collagen extracted for Stevens et al 2008 (N isotopes also reported in Reade et al. 2023)
Hangest sur somme	France	49.9817	2.0658	not specified Niveau: inferieur	UPN-505	A/HAN/B/1	Equus	Equus sp.	bone	not specified	OxA-4936	11630	90	13593	13364	13488	0.196944	0.204885	624.526	179.176	Fagnart 1997	This study	PF at LGM not today	no	Collagen extracted for Reade et al. 2023 (N isotopes also reported in Reade et al. 2023)
Hijenska	Croatia	45.41	13.66	CROA MG-02	OxA-23787		Megaloceros	Megaloceros giganteus	bone	bone	OxA-23787	44400	2000	49453	44947	47634	0.14	6.59	858.822	260.987	Lister and Stuart, 2019	This study	No PF past or today	NA	Pre-extracted collagen from ORAU, N isotopes reported in Reade et al. 2023
Hornsea, E. Yorks	UK	53.9	-0.16		OxA-11410		Mammuthus	Mammuthus primigenius	tooth	tooth	OxA-11410	30100	270	34761	34281	34554	0.23	-13.6548	500.555	148.97	Barnes et al. 2007	This study	PF at LGM not today	no	ORAU collagen left over from 14C dating
Igue du Gral Cave, Sauliac-sur	France	44.5094	1.6856	MG.FR-24	OxA-21062		Megaloceros	Megaloceros giganteus	bone	bone	OxA-21062	42400	700	45566	44534	45099	0.14	14.7907	860.747	255.894	Lister and Stuart, 2019	This study	No PF past or today	NA	Pre-extracted collagen from ORAU, N isotopes reported in Reade et al. 2023
Ihasalu	Estonia	59.4966	25.2027		OxA-11563		Mammuthus	Mammuthus primigenius	tooth	ivory	OxA-11563	46500	1000	50369	47694	49200	0.18	4.22168	692.354	207.328	Barnes et al. 2007	This study	PF at LGM not today	no	ORAU collagen left over from 14C dating
Jasna Cave	Poland	50.26	19.41		OxA-11159		Coelodonta	Coelodonta antiquitatis	bone	ulna	OxA-11159	16140	90	19584	19360	19474	0.17	-12.2065	698.382	208.552	Stuart & Lister 2012	This study	PF at LGM not today	no	Pre-extracted collagen from ORAU, N isotopes reported in Reade et al. 2023
Jasna Cave	Poland	50.26	19.41		OxA-11095		Coelodonta	Coelodonta antiquitatis	tooth	upper molar, cut root	OxA-11095	17880	100	21925	21476	21729	0.14	-9.82281	815.292	244.15	Stuart & Lister 2012	This study	PF at LGM not today	no	Pre-extracted collagen from ORAU, N isotopes reported in Reade et al. 2023
Jasna Cave	Poland	50.43	19.68	Po.16	OxA-11160		Alces	Alces alces	tooth	tooth	OxA-11160	10345	55	12450	12002	12191	0.15	4.40603	678.732	202.163	Lister & Stuart in prep	This study	PF at LGM not today	yes	ORAU collagen left over from 14C dating
Jasna Cave	Poland	50.43	19.68	Po.10	OxA-11157		Alces	Alces alces	tooth	tooth	OxA-11157	10460	60	12614	12179	12386	0.18	4.52948	667.545	198.724	Lister & Stuart in prep	This study	PF at LGM not today	yes	ORAU collagen left over from 14C dating
Kůlna	Czech Republic	49.41	16.74	Layer 4 K2011003	UPN-162		Alces	Alces alces	bone	metatarsus	OxA-25284	11820	50	13754	13606	13679	0.17	-4.7	426	130	Nerudová & Neruda, 2014	Reade et al. 2021	PF at LGM not today	yes	NA
Kůlna	Czech Republic	49.41	16.74	Layer 4 K2011004	UPN-163		Alces	Alces alces	bone	metatarsus	OxA-25285	11770	55	13746	13515	13636	0.13	-1.8	315	100	Nerudová & Neruda, 2014	Reade et al. 2021	PF at LGM not today	yes	NA
Kůlna	Czech Republic	49.41	16.74	Layer 4 Sector A	UPN-164		Equus	Equus sp.	bone	tibia	OxA-25286	11070	50	13080	12929	12995	0.15	-6.8	655	199	Nerudová & Neruda, 2014	Reade et al. 2021	PF at LGM not today	yes	NA
Kůlna	Czech Republic	49.41	16.74	Layer 6 sector G1	UPN-169		Equus	Equus sp.	bone	pelvis	OxA-25289	12575	60	15112	14847	14954	0.18	-5.7	574	181	Nerudová & Neruda, 2014	Reade et al. 2021	PF at LGM not today	yes	NA
Kůlna	Czech Republic	49.41	16.74	Layer 5 K2011007	UPN-166		Equus	Equus	bone	not given	OxA-25288	12600	60	15132	14911	15004	0.21	-4.6	453	142	Nerudová & Neruda, 2014	Reade et al. 2021	PF at LGM not today	yes	NA
Kůlna	Czech Republic	49.41	16.74	Layer 6 sector G1	UPN-170		Equus	Equus sp.	bone	tibia	OxA-25290	12555	60	15077	14620	14907	0.18	-3	494	154	Nerudová & Neruda, 2014	Reade et al. 2021	PF at LGM not today	yes	NA
Kůlna	Czech Republic	49.41	16.74	Layer 5 K2011006	UPN-165		Large herbivore	Large herbivore	bone	not given	OxA-25287	11010	50	13053	12841	12938	0.2	-2.1	500	156	Nerudová & Neruda, 2014	Reade et al. 2021	PF at LGM not today	yes	NA
Kůlna	Czech Republic	49.41	16.74	Layer 5 sector A, 4c, found 1961	UPN-106		Bos/Bison	Bos primigenius	bone	carpal	OxA-V-3079-13C	11133	33	13106	13003	13077	0.15	-9.3	723	221	Reade et al. 2021	Reade et al. 2021	PF at LGM not today	yes	NA
Kůlna	Czech Republic	49.41	16.74	Layer 4 sektor D, II/L, depth 165-185 cm, found 1962	UPN-065		Cervus elaphus	Cervus elaphus	bone	metatarsus	OxA-V-3071-8C/OxA-V-3071-9C	11805	22	13747	13601	13676	0.17	-9.5	727	229	Reade et al. 2021	Reade et al. 2021	PF at LGM not today	yes	NA
Kůlna	Czech Republic	49.41	16.74	Layer 6 sektor A, 6a, found 1961	UPN-102		Equus	Equus sp.	bone	phalange	OxA-V-2775-57C	12910	60	15540	15322	15434	0.14	-19.3	777	237	Reade et al. 2021	Reade et al. 2021	PF at LGM not today	yes	NA
Kůlna	Czech Republic	49.41	16.74	Layer 6 sector G1, 38/L, depth 95-145 cm, found 1966, OK-094867	UPN-154		Equus	Equus sp.	bone	phalange	OxA-V-3079-16C	12673	37	15176	15035	15109	0.16	-17.7	717	228	Reade et al. 2021	Reade et al. 2021	PF at LGM not today	yes	NA
Kůlna	Czech Republic	49.41	16.74	Layer 6 sector G1, 38/L, depth 95-145 cm, OK 094873, found 1966	UPN-153		Equus	Equus sp.	bone	scapula	OxA-V-3079-15C	12665	36	15163	15025	15098	0.17	-13.9	708	225	Reade et al. 2021	Reade et al. 2021	PF at LGM not today	yes	NA
Kůlna	Czech Republic	49.41	16.74	Layer 5 sector A, 6g, found 1961	UPN-120		Equus	Equus sp.	bone	phalange 2	OxA-V-2777-55C	12810	60	15387	15170	15291	0.14	-11.8	827	255	Reade et al. 2021	Reade et al. 2021	PF at LGM not today	yes	NA
Kůlna	Czech Republic	49.41	16.74	Layer 6 sektor A, pruh 3-4, found 1961	UPN-103		Equus	Equus sp.	bone	pelvis	OxA-V-3079-12C	12898	38	15504	15322	15417	0.14	-10.3	732	222	Reade et al. 2021	Reade et al. 2021	PF at LGM not today	yes	NA
Kůlna	Czech Republic	49.41	16.74	Layer 5 sector D, III, IV / S, depth 180-190, found 1962	UPN-128		Equus	Equus sp.	bone	metacarpus, proximal	OxA-V-2777-56C	11510	50	13435	13330	13385	0.13	-5.3	673	202	Reade et al. 2021	Reade et al. 2021	PF at LGM not today	yes	NA
Kůlna	Czech Republic	49.41	16.74	Layer 4 sektor A, 9d, found 1961	UPN-085		Rangifer	Rangifer tarandus	bone	phalange 2	OxA-V-3071-10C	19980	70	24082	23867	23988	0.21	-9.2	530	160	Reade et al. 2021	Reade et al. 2021	PF at LGM not today	yes	NA
Kůlna	Czech Republic	49.41	16.74	Layer 5 sector D, I, IV / S, depth 190-200 cm, found 1962	UPN-135		Rangifer	Rangifer tarandus	bone	phalange 1	OxA-V-3079-14C	12909	38	15518	15336	15430	0.17	-7.9	635	189	Reade et al. 2021	Reade et al. 2021	PF at LGM not today	yes	NA
Kůlna	Czech Republic	49.41	16.74	Layer 6 sector G1	UPN-171		Rangifer	Rangifer tarandus	bone	humerus	OxA-V-2793-53C	12650	50	15154	14995	15078	0.2	-5.4	476	150	Reade et al. 2021	Reade et al. 2021	PF at LGM not today	yes	NA
Kamchatka	Russia	61	167		OxA-11813		Mammuthus	Mammuthus primigenius	tooth	ivory	OxA-11813	45200	800	48424	46644	47561	0.23	7.86007	544.18	160.937	Barnes et al. 2007	This study	PF throughout past 50,000 years	NA	ORAU collagen left over from 14C dating
Kamenka Buryatiya	Russia	51.322	42.768	Upper Palaeolithic site, Complex A	OxA-12116		Megaloceros	Megaloceros giganteus	bone	humerus	OxA-12116	39290	350	42911	42576	42757	0.19	6.17144	607.624	180.562	Stuart et al. 2004	This study	PF at LGM not today	yes	ORAU collagen left over from 14C dating
Kamyshlov Mire, W Siberia	Russia	56.92	62.73	skeleton from peat bog	OxA-13015		Megaloceros	Megaloceros giganteus	bone	bone	OxA-13015	6881	38	7750	7670	7712	0.21	0.588639	579.028	172.956	Stuart et al. 2004	This study	PF at LGM not today	beyond loess map extent	ORAU collagen left over from 14C dating
Kastelhöhle	Switzerland	47.43	7.57	Intermediate horizon (Badegoulian/Grubgrabian)	UPN-221	KA1 / RGZM 16	Rangifer	Rangifer tarandus	bone	metatarsus	OxA-V-2793-57C	19140	80	23112	22963	23046	0.19	-8.7	628	192	Reade et al. 2020a	Reade et al. 2020a	PF at LGM not today	yes	NA
Kastelhöhle	Switzerland	47.43	7.57	Intermediate horizon (Badegoulian/Grubgrabian)	UPN-223	KA3 / RGZM 18	Rangifer	Rangifer tarandus	bone	phalange I	OxA-V-3002-12C	19130	80	23102	22958	23038	0.16	-8.1	721	220	Reade et al. 2020a	Reade et al. 2020a	PF at LGM not today	yes	NA
Kastelhöhle	Switzerland	47.43	7.57	Intermediate horizon (Badegoulian/Grubgrabian)	UPN-222	KA2 / RGZM 17	Rangifer	Rangifer tarandus	bone	tibia	OxA-V-2797-20C	19200	90	23198	22986	23109	0.18	-7.8	659	203	Reade et al. 2020a	Reade et al. 2020a	PF at LGM not today	yes	NA
Kastelhöhle	Switzerland	47.43	7.57	Upper horizon (Magdalenian)	UPN-232		Bos/Bison	Bos/bison	bone	metacarpus	OxA-V-2794-25C	13550	60	16452	16249	16351	0.15	-5.3	741	227	Reade et al. 2020b	Reade et al. 2020b	PF at LGM not today	yes	NA
Kastelhöhle	Switzerland	47.43	7.57	Upper horizon (Magdalenian)	UPN-214		Equus	Equus sp.	bone	phalange I	OxA-V-2754-48C	12880	50	15492	15294	15397	0.17	-2.6	699	217	Reade et al. 2020b	Reade et al. 2020b	PF at LGM not today	yes	NA
Kastelhöhle	Switzerland	47.43	7.57	Upper horizon (Magdalenian)	UPN-218		Equus	Equus sp.	bone	carpal	OxA-V-2748-25C	12560	50	15083	14656	14932	0.18	-1.7	655	198	Reade et al. 2020b	Reade et al. 2020b	PF at LGM not today	yes	NA
Kastelhöhle	Switzerland	47.43	7.57	Upper horizon (Magdalenian)	UPN-213		Rangifer	Rangifer tarandus	bone	tibia	OxA-V-2793-56C	12200	50	14161	14050	14108	0.2	-6.5	600	183	Reade et al. 2020b	Reade et al. 2020b	PF at LGM not today	yes	NA
Kastelhöhle	Switzerland	47.43	7.57	Upper horizon (Magdalenian)	UPN-212		Rangifer	Rangifer tarandus	bone	tibia	OxA-V-2793-55C	12380	50	14810	14265	14465	0.2	-6	554	168	Reade et al. 2020b	Reade et al. 2020b	PF at LGM not today	yes	NA
Kastelhöhle	Switzerland	47.43	7.57	Upper horizon (Magdalenian)	UPN-204		Rangifer	Rangifer tarandus	bone	radius sin.	OxA-V-2793-54C	12270	60	14299	14083	14214	0.2	-5.5	580	177	Reade et al. 2020b	Reade et al. 2020b	PF at LGM not today	yes	NA
Kazan Region	Russia	55.75	49.13	KZ MG-01 (cat #1393)	OxA-20833		Megaloceros	Megaloceros giganteus	bone	bone	OxA-20833	43400	650	46357	45109	45830	0.25	-1.47576	468.174	141.347	Lister and Stuart, 2019	This study	PF at LGM not today	no	ORAU collagen left over from 14C dating
Kent's Cavern	UK	50.47	-3.5		OxA-13921	A/KC/B/31	Coelodonta	Coelodonta antiquitatis	bone	right metacarpal 3	OxA-13921	36040	330	41390	40823	41120	0.14	7.66276	843.746	259.321	Higham et al. 2011	This study	PF at LGM not today	no	Pre-extracted collagen from ORAU, N isotopes reported in Reade et al. 2023
Kent's Cavern	UK	50.47	-3.5		OxA-14715		Coelodonta	Coelodonta antiquitatis	bone	distal right tibia	OxA-14715	35150	330	40656	39927	40303	0.14	13.5744	844.359	266.381	Higham et al. 2011	This study	PF at LGM not today	no	Pre-extracted collagen from ORAU, N isotopes reported in Reade et al. 2023
Kent's Cavern	UK	50.47	-3.5	M556	UPN-705	OxA-14825	Rangifer	Rangifer tarandus	bone	astragalus	OxA-14826	14395	60	17716	17400	17560	0.188233	-4.85571	584.439	177.168	Jacobi & Higham 2009b	This study	PF at LGM not today	no	Pre-extracted collagen from ORAU, N isotopes reported in Reade et al. 2023
Kent's Cavern	UK	50.47	-3.5	M557	UPN-703	OxA-14826	Rangifer	Rangifer tarandus	bone	phalanx	OxA-14825	10255	45	12040	11830	11955	0.154427	7.85461	730.582	227.522	Jacobi & Higham 2009b	This study	PF at LGM not today	no	Pre-extracted collagen from ORAU, N isotopes reported in Reade et al. 2023
Kent's Cavern	UK	50.47	-3.5	p6757 KC1 KCI:BM(NH)Coll.117	UPN-865	A/KC/B/41, UPN-704, OxA-17723	Equus	Equus sp.	bone	metacarpal, proximal right	OxA-17723	12315	50	14785	14117	14283	0.132449	-9.35699	846.136	253.904	Jacobi & Higham 2011	This study	PF at LGM not today	no	Collagen extracted for Stevens & Hedges 2004 (N isotopes also reported in Reade et al. 2023)
Kent's Cavern	UK	50.47	-3.5	M566	UPN-300	A/KC/B/42	Equus	Equus caballus	bone	left maxilla	OxA-6669	12330	90	14800	14116	14399	0.14	-8.81252	880.335	269.158	Kaagan 2000	This study	PF at LGM not today	no	This study: UCL (AG): Collagen extraction method detailed in Reade et al. 2023
Kent's Cavern	UK	50.47	-3.5	M551	UPN-706	A/KC/B/36	Bos/Bison	Bos prim.	bone	Mandible and teeth	OxA-V-2776-24C	12340	50	14791	14174	14363	0.155769	4.73951	742.451	228.737	Reade et al. 2023	This study	PF at LGM not today	no	Collagen extracted for Reade et al. 2023 (N isotopes also reported in Reade et al. 2023)
Kent's Cavern	UK	50.47	-3.5	P14287. Pengelly 1873, blackband	UPN-729		Bos/Bison	Bos sp.	bone	2nd phalange	OxA-V-2776-25C	12410	50	14823	14322	14526	0.1568	6.40677	716.483	223.812	Reade et al. 2023	This study	PF at LGM not today	no	Collagen extracted for Reade et al. 2023 (N isotopes also reported in Reade et al. 2023)
Kent's Cavern	UK	50.47	-3.5	M100405 (18304B)	UPN-710		Equus	Equus ferus	tooth	Lower P3/4?	OxA-V-3138-16C	29260	160	34119	33657	33853	0.127768	0.0477969	897.144	275.176	Reade et al. 2023	This study	PF at LGM not today	no	Collagen extracted for Reade et al. 2023 (N isotopes also reported in Reade et al. 2023)
Kent's Cavern	UK	50.47	-3.5	M100403 (18304B)	UPN-711		Rangifer	Rangifer tarandus	bone	humerus	OxA-V-3138-17C	10316	26	12427	11948	12076	0.211171	6.9366	498.311	149.579	Reade et al. 2023	This study	PF at LGM not today	no	Collagen extracted for Reade et al. 2023 (N isotopes also reported in Reade et al. 2023)
Kent's Cavern	UK	50.47	-3.5	P20962	UPN-730		Bos/Bison	Bos primigenius	bone	long bone fragment	OxA-V-2798-17C	12350	50	14793	14190	14396	0.168969	8.29579	702.783	208.597	This study	This study	PF at LGM not today	no	This study: UCL (AG for isotopes, collagen later ultrafiltered for dating); Collagen extraction method detailed in Reade et al. 2023
Kettig	Germany	50.4	7.47	41/41 4	UPN-1002	A/KET/B/1	Cervus elaphus	Cervus elaphus	bone	astragalus, dext	OxA-V-3138-11C	11519	31	13435	13345	13389	0.16	-4	714	220	Reade et al. 2023	This study	PF at LGM not today	no	This study: UCL (AF, with solvent & base wash) ; collagen extraction method detailed in Reade et al. 2023
Khatanga River Mouth	Russia	71.98	102.52		OxA-11839		Mammuthus	Mammuthus primigenius	tooth	tooth	OxA-11839	46600	1100	50738	47712	49387	0.23	3.44041	532.341	160.441	Barnes et al. 2007	This study	PF throughout past 50,000 years	NA	ORAU collagen left over from 14C dating
Khomus-Yuryakh Bol. River	Russia	70.06	153.47		OxA-11975		Coelodonta	Coelodonta antiquitatis	bone	pelvis	OxA-11975	15515	65	18866	18766	18814	0.16	1.45101	746.492	227.663	Stuart & Lister 2012	This study	PF throughout past 50,000 years	NA	ORAU collagen left over from 14C dating
Khroma River, Indigirka	Russia	70.61	142.8		OxA-11843		Coelodonta	Coelodonta antiquitatis	bone	tibia/aDNA	OxA-11843	20370	100	24610	24285	24471	0.17	1.9461	672.98	204.884	Lorenzen et al. 2011	This study	PF throughout past 50,000 years	NA	ORAU collagen left over from 14C dating
Kilmaurs	UK	55.6	-4.53		OxA-26362		Mammuthus	Mammuthus primigenius	tooth	ivory	OxA-26362	46700	2700	52501	46830	50018	0.21	-0.528207	568.351	170.842	Palkopoulou et al. 2013	This study	PF at LGM not today	no	ORAU collagen left over from 14C dating
King Arthur's Cave	UK	51.84	-2.66	W2.20/185 Yellow rubble, upper half (2D)	UPN-273	UPN-851	Equus	Equus ferus	bone	1st phalanx	OxA-34191	12505	65	14988	14516	14705	0.13	-8.11236	874.473	269.231	Marr 2017	This study	PF at LGM not today	no	This study: UCL (AG): Collagen extraction method detailed in Reade et al. 2023
King Arthur's Cave	UK	51.84	-2.66	W2.20/285 2nd hearth 1926-1927	UPN-245	n/a	Cervus elaphus	Cervus elaphus	bone	Distal metacarpal	OxA-V-3134-35C	11918	27	13615	14005	13781	0.16	-13.95	755.833	233.571	Reade et al. 2023	This study	PF at LGM not today	no	Collagen extracted for Reade et al. 2023 (N isotopes also reported in Reade et al. 2023)
King Arthur's Cave	UK	51.84	-2.66	W2.20/708 No level	UPN-282	n/a	Cervus elaphus	Cervus elaphus?	bone	not given	OxA-V-3137-8C	12382	28	14800	14310	14449	0.15	-3.50061	789.086	236.075	Reade et al. 2023	This study	PF at LGM not today	no	Collagen extracted for Reade et al. 2023 (N isotopes also reported in Reade et al. 2023)
King Arthur's Cave	UK	51.84	-2.66	W2.20/271 2nd hearth platform	UPN-269	n/a	Cervus elaphus	Cervus elaphus	bone	metapodial	OxA-V-3136-36C	12410	30	14816	14327	14503	0.15	-1.92333	769.156	238.096	Reade et al. 2023	This study	PF at LGM not today	no	Collagen extracted for Reade et al. 2023 (N isotopes also reported in Reade et al. 2023)
King Arthur's Cave	UK	51.84	-2.66	W2.20/342 2nd hearth 1926-1927	UPN-247	A/KAC/B/27	Cervus elaphus	Cervus elaphus	bone	Distal left tibia	OxA-V-3134-37C	12204	27	14062	14185	14097	0.16	6.7	775.914	243.318	Reade et al. 2023	This study	PF at LGM not today	no	Collagen extracted for Reade et al. 2023 (N isotopes also reported in Reade et al. 2023)
King Arthur's Cave	UK	51.84	-2.66	W2.20/235 2nd hearth platform	UPN-254	A/KAC/B/22	Cervus elaphus	Cervus elaphus	bone	metapodial	OxA-V-3134-19C	11852	27	13611	13786	13691	0.15	7.08462	784.336	242.935	Reade et al. 2023	This study	PF at LGM not today	no	Collagen extracted for Reade et al. 2023 (N isotopes also reported in Reade et al. 2023)
King Arthur's Cave	UK	51.84	-2.66	W2.20/263 2nd hearth platform	UPN-268	n/a	Cervus elaphus	Cervus elaphus	bone	metapodial	OxA-V-3136-35C	12183	29	14105	14050	14080	0.15	7.60645	811.723	253.967	Reade et al. 2023	This study	PF at LGM not today	no	Collagen extracted for Reade et al. 2023 (N isotopes also reported in Reade et al. 2023)
King Arthur's Cave	UK	51.84	-2.66	W2.20/340 3rd hearth platform	UPN-255	A/KAC/B/18	Cervus elaphus	Cervus elaphus	bone	left metatarsal	OxA-V-3134-34C	12230	29	14079	14308	14126	0.16	11.168	766.029	237.558	Reade et al. 2023	This study	PF at LGM not today	no	Collagen extracted for Reade et al. 2023 (N isotopes also reported in Reade et al. 2023)
King Arthur's Cave	UK	51.84	-2.66	W2.20/231 2nd hearth 1926	UPN-246	A/KAC/B/21	Cervus elaphus	Cervus elaphus	bone	Proximal left metatarsal, posterior shaft fragment	OxA-V-3134-36C	11735	27	13512	13738	13551	0.16	13.95	750	230	Reade et al. 2023	This study	PF at LGM not today	no	Collagen extracted for Reade et al. 2023 (N isotopes also reported in Reade et al. 2023)
King Arthur's Cave	UK	51.84	-2.66	W2.20/341 2nd hearth 1926-1927	UPN-252	A/KAC/B/26	Cervus elaphus	Cervus elaphus	bone	Distal left metacarpal	OxA-V-3134-38C	10984	25	12835	13059	12883	0.16	14.0032	742.743	234.682	Reade et al. 2023	This study	PF at LGM not today	no	Collagen extracted for Reade et al. 2023 (N isotopes also reported in Reade et al. 2023)
King Arthur's Cave	UK	51.84	-2.66	W2.21/526 ? Unknown	UPN-279		Equus	Equus ferus	tooth	lower cheek tooth (P3-M2)	OxA-V-3079-20C	12475	37	14924	14517	14658	0.13	-13.5912	781.892	239.448	Reade et al. 2023	This study	PF at LGM not today	no	Collagen extracted for Reade et al. 2023 (N isotopes also reported in Reade et al. 2023)
King Arthur's Cave	UK	51.84	-2.66	W2.20/148 Platform, Yellow rubble, lower half (2D), 1927	UPN-278		Equus	Equus ferus	bone	oesamoid	OxA-V-3058-28C	12507	31	14958	14590	14827	0.13	-11.8392	881.591	267.779	Reade et al. 2023	This study	PF at LGM not today	no	Collagen extracted for Reade et al. 2023 (N isotopes also reported in Reade et al. 2023)
King Arthur's Cave	UK	51.84	-2.66	W2.21/285 1st hearth	UPN-276	A/KAC/B/12	Equus	Equus ferus	tooth	?Left upper M3. Check this	OxA-V-2797-24C	12410	50	14823	14322	14526	0.14	-11.2245	824.83	252.161	Reade et al. 2023	This study	PF at LGM not today	no	Collagen extracted for Reade et al. 2023 (N isotopes also reported in Reade et al. 2023)
King Arthur's Cave	UK	51.84	-2.66	W2.20/152 Yellow rubble, lower half (2D)	UPN-274	UPN-851	Equus	Equus ferus	bone	not given	OxA-V-3137-7C	12319	27	14765	14167	14258	0.14	-10.4374	822.907	251.184	Reade et al. 2023	This study	PF at LGM not today	no	Collagen extracted for Reade et al. 2023 (N isotopes also reported in Reade et al. 2023)
King Arthur's Cave	UK	51.84	-2.66	W2.21/726 ?Mammoth layer. 7.9.27	UPN-280	A/KAC/B/6	Equus	Equus ferus	tooth	lower left P3/P4	OxA-V-2754-50C	12450	50	14875	14370	14610	0.14	-10.4147	817.744	251.441	Reade et al. 2023	This study	PF at LGM not today	no	Collagen extracted for Reade et al. 2023 (N isotopes also reported in Reade et al. 2023)
King Arthur's Cave	UK	51.84	-2.66	W2.20/147 Platform, Yellow rubble, lower half (2D), 1927	UPN-277		Equus	Equus ferus	bone	oesamoid	OxA-V-2797-25C	10810	50	12810	12724	12752	0.15	7.96624	769.972	232.002	Reade et al. 2023	This study	PF at LGM not today	no	Collagen extracted for Reade et al. 2023 (N isotopes also reported in Reade et al. 2023)
King Arthur's Cave	UK	51.84	-2.66	W2.20/1012 ? Not in catalogue	UPN-248		Equus	Equus sp.	bone	? Femur	OxA-V-2797-23C	27950	190	32107	31627	31888	0.17	9.31914	672.535	206.444	Reade et al. 2023	This study	PF at LGM not today	no	Collagen extracted for Reade et al. 2023 (N isotopes also reported in Reade et al. 2023)
King Arthur's Cave	UK	51.84	-2.66	W2.20.299a	UPN-870	Melissa Marr sample MM021	Equus	Equus ferus	bone	metacarpal	OxA-V-3148-33C	10733	30	12740	12715	12727	0.164855	12.0474	726.365	217.24	Reade et al. 2023	This study	PF at LGM not today	no	Collagen extracted for Reade et al. 2023 (N isotopes also reported in Reade et al. 2023)
King Arthur's Cave	UK	51.84	-2.66	W2.20.701	UPN-869	Melissa Marr sample MM014	Equus	Equus ferus	bone	phalanx	OxA-V-3148-32C	9889	29	11313	11242	11276	0.154406	12.5397	794.566	238.529	Reade et al. 2023	This study	PF at LGM not today	no	Collagen extracted for Reade et al. 2023 (N isotopes also reported in Reade et al. 2023)
King Arthur's Cave	UK	51.84	-2.66	KAC 624a	UPN-920	A/KAC/B/35, OxA-6839	Rangifer	Rangifer tarandus	bone	bone, mandible	OxA-21425	10010	45	11685	11345	11497	0.171543	12.1602	677.467	210.316	Reade et al. 2023	This study	PF at LGM not today	no	Pre-extracted collagen from ORAU, N isotopes reported in Reade et al. 2023
King Arthur's Cave	UK	51.84	-2.66	W2.21/112 2nd hearth platform 2nd hearth platform	UPN-283	n/a	Cervus elaphus	Cervus elaphus	tooth	lower right M3	OxA-V-3137-9C	12091	27	14055	13872	13936	0.16	5.8006	740.399	217.747	This study	This study	PF at LGM not today	no	This study: UCL (AG for isotopes, collagen later ultrafiltered for dating) ; Collagen extraction method detailed in Reade et al. 2023
Kniegrotte	Germany	50.69	11.64	12/X (=VIII with a circle)	UPN-967	Germany	Saiga	Saiga tatarica	bone	saiga	OxA-4853	13090	130	15907	15502	15692	0.145033	-8.53361	799.617	236.757	Hedges et al. 1998	This study	PF at LGM not today	no	Collagen extracted for Reade et al. 2023 (N isotopes also reported in Reade et al. 2023)
Kniegrotte	Germany	50.69	11.64	Oxford 1	UPN-963	OxA-4832	Rangifer	Rangifer tarandus	bone	scapula sin.	OxA-V-2794-38C	13060	60	15755	15565	15653	0.162359	-10.6797	717.905	215.912	Reade et al. 2023	This study	PF at LGM not today	no	Collagen extracted for Reade et al. 2023 (N isotopes also reported in Reade et al. 2023)
Koblenz-Metternich	Germany	50.37	7.57		OxA-10893		Coelodonta	Coelodonta antiquitatis	tooth	upper premolar	OxA-10893	44700	900	47925	46086	47123	0.15	-3.20979	787.726	231.093	Stuart & Lister 2012	This study	PF at LGM not today	no	Pre-extracted collagen from ORAU, N isotopes reported in Reade et al. 2023
Koblenz-Metternich	Germany	50.37	7.55	RGZM9/4MRMK/2361	UPN-528	OxA-16994	Equus	Equus sp.	bone	not given	OxA-16994	27020	140	31194	31065	31132	0.146525	2.23447	781.971	234.256	This study	This study	PF at LGM not today	no	ORAU collagen left over from 14C dating
Køge Bugt	Denmark	55.6	12.3	KÃ¸ge Bugt - underwater in sea	OxA-10234		Megaloceros	Megaloceros giganteus	bone	left mandible with m2	OxA-10234	12005	65	14011	13798	13907	0.24	-2.51081	459.795	133.797	Lister and Stuart, 2019	This study	PF at LGM not today	no	Pre-extracted collagen from ORAU, N isotopes reported in Reade et al. 2023
Kokhma, Upper Volga	Russia	56.9337	41.1088		OxA-17374		Mammuthus	Mammuthus primigenius	bone	bone	OxA-17374	33640	270	39184	38140	38565	0.31	-21.4527	373.737	114.158	Petrova 2009	This study	PF at LGM not today	yes	ORAU collagen left over from 14C dating
Komarowa Cave	Poland	50.75	19.27	Layer 13D	OxA-11098		Megaloceros	Megaloceros giganteus	tooth	L upper premolar 4	OxA-11098	37500	450	42300	41866	42057	0.16	-2.02423	772.593	227.06	Stuart et al. 2004	This study	PF at LGM not today	no	Pre-extracted collagen from ORAU, N isotopes reported in Reade et al. 2023
Komarowa Cave	Poland	50.75	19.27	Layer 13E	OxA-11097		Megaloceros	Megaloceros giganteus	tooth	upper molar	OxA-11097	43900	1000	47353	45365	46448	0.16	3.30916	753.762	224.923	Stuart et al. 2004	This study	PF at LGM not today	no	Pre-extracted collagen from ORAU, N isotopes reported in Reade et al. 2023
Koosa	Estonia	58.52	27.07		OxA-12058		Mammuthus	Mammuthus primigenius	tooth	tooth	OxA-12058	40900	600	44374	43348	43883	0.17	4.11166	720.083	216.666	Barnes et al. 2007	This study	PF at LGM not today	no	ORAU collagen left over from 14C dating
Kraków Spadzista	Poland	50.06	19.9	KrSp C2/2011/B5/5883	KSp-6.1	JK2790	Mammuthus	Mammuthus primigenius	tooth	right lower molar dentine	Poz-48406	24480	190	29011	28550	28735	0.13	-3.3	859	264	Drucker et al. 2015b	Drucker et al. 2015b	PF at LGM not today	no	NA
Kraków Spadzista	Poland	50.06	19.9	KrSp C2/2011/A6/6571	KSp-3	JK2796	Mammuthus	Mammuthus primigenius	tooth	right lower Molar dentine	Poz-48405	24680	200	29119	28761	28927	0.13	-2.9	887	270	Drucker et al. 2015b	Drucker et al. 2015b	PF at LGM not today	no	NA
Kraków Spadzista	Poland	50.06	19.9	KrSp C2/2012/A7/6603	KSp-1	JK2798	Mammuthus	Mammuthus primigenius	tooth	tusk alveolar bone	Poz-51334	19840	100	23965	23770	23870	0.13	-0.5	699	210	Drucker et al. 2015b	Drucker et al. 2015b	PF at LGM not today	no	NA
Kraków Spadzista	Poland	50.06	19.9	KrSp B1/F1/0937	KSp-9	JK2803	Mammuthus	Mammuthus primigenius	tooth	upper molar dentine	Poz-61263	24480	180	28996	28560	28738	0.13	-4.6	884	270	Yates et al. 2017	Drucker et al. 2015b	PF at LGM not today	no	NA
Kraków Spadzista	Poland	50.06	19.9	KrSp E1/2012/F4/3037	JK2795		Mammuthus	Mammuthus primigenius	tooth	left lower molar root	Poz-51416	24150	150	28588	28103	28321	0.13	-3.3	880	267	Yates et al. 2017	Drucker et al. 2015b	PF at LGM not today	no	NA
Kraków Spadzista	Poland	50.06	19.9	KrSp B/E4/855	JK2793	JK2793	Mammuthus	Mammuthus primigenius	tooth	right lower molar root	Poz-58704	23590	120	27845	27671	27750	0.13	-2.9	838	253	Yates et al. 2017	Drucker et al. 2015b	PF at LGM not today	no	NA
Kraków Spadzista	Poland	50.06	19.9	KrSp E1/2012/F3/3224	KSp-7	JK2794	Mammuthus	Mammuthus primigenius	tooth	left upper molar root	Poz-51415	24010	150	28346	27889	28164	0.13	-1.1	893	270	Yates et al. 2017	Drucker et al. 2015b	PF at LGM not today	no	NA
Krasivoye, Mal. Anyuy	Russia	67.08	165.3		OxA-21043		Mammuthus	Mammuthus primigenius	bone	bone	OxA-21043	48400	900	54329	49855	51538	0.17	1.96468	683.209	208.734	Palkopoulou et al. 2013	This study	PF throughout past 50,000 years	NA	ORAU collagen left over from 14C dating
Kulmetovsk Cave	Russia	55.15	58.69	cave sediments	OxA-10676		Megaloceros	Megaloceros giganteus	bone	maxilla with teeth	OxA-10676	10260	55	12097	11825	11980	0.18	5.551	658.753	194.953	Stuart et al. 2004	This study	PF at LGM not today	beyond loess map extent	ORAU collagen left over from 14C dating
La Baume (Gigny-sur-Suran)	France	46.45	5.47		GIS-1		Cervus elaphus	Cervus elaphus	bone	not given	Ly-3289-Poz	6280	45	7256	7164	7208	0.16	8.1	711	242	Drucker et al. 2011	Drucker et al. 2011	PF at LGM not today	no	NA
La Baume (Gigny-sur-Suran)	France	46.45	5.47	16-F2-VI	GIS 2		Rangifer	Rangifer tarandus	bone	phalanx I	Ly-3290(Poz)	17645	110	21649	21044	21335	0.16	-4.1	720	214	Drucker et al. 2012	Drucker et al. 2012	PF at LGM not today	no	NA
La Baume (Gonvillars)	France	47.54	6.64		GNV 3		Cervus elaphus	Cervus elaphus	bone	not given	Ly-3884-GrA	6150	40	7157	6979	7051	0.16	8.5	676	222	Drucker et al. 2011	Drucker et al. 2011	PF at LGM not today	no	NA
La Baume de Montandon	France	47.33	6.82		STH-1		Cervus elaphus	Cervus elaphus	bone	not given	Ly-3732-GrA	9255	40	10505	10304	10426	0.17	7.9	667	207	Drucker et al. 2011	Drucker et al. 2011	PF at LGM not today	no	NA
La Baume de Montandon	France	47.33	6.82		STH-2		Cervus elaphus	Cervus elaphus	bone	not given	Ly-3734-GrA	6445	40	7422	7325	7363	0.15	10.3	753	242	Drucker et al. 2011	Drucker et al. 2011	PF at LGM not today	no	NA
La Chênelaz	France	45.89	5.53	M6 2975	ALP-1		Rangifer	Rangifer tarandus	bone	phalanx II	OxA-8027 (Ly-703)	12460	65	14924	14370	14629	0.19	-4.7	541	177	Bridault et al. 2000	Drucker et al. 2012	PF at LGM not today	no	NA
La Fru	France	45.45	5.78	Fru III K70 1336	FRU-5		Cervus elaphus	Cervus elaphus	bone	Left talus	GrA-22098	12260	90	14785	14053	14246	0.16	-0.2	614	205	Drucker et al. 2008	Drucker et al. 2011	No PF past or today	NA	NA
La Fru	France	45.45	5.78	Fru III L70 354	FRU-9		Cervus elaphus	Cervus elaphus	bone	Right metacarpal	GrA-25061	8630	70	9675	9536	9615	0.15	2.3	693	223	Drucker et al. 2008	Drucker et al. 2011	No PF past or today	NA	NA
La Fru	France	45.45	5.78	Fru I F24 129 c1c	FRU-10		Cervus elaphus	Cervus elaphus	bone	Left metacarpal	GrA-25052	11950	60	14007	13761	13845	0.15	3.4	765	239	Drucker et al. 2008	Drucker et al. 2011	No PF past or today	NA	NA
La Fru	France	45.45	5.78	Fru III L72 591	FRU-4		Cervus elaphus	Cervus elaphus	bone	Phalanx I	GrA-25062	11420	60	13345	13185	13289	0.12	5.5	676	228	Drucker et al. 2008	Drucker et al. 2011	No PF past or today	NA	NA
La Fru	France	45.45	5.78	Fru I A9 QAOB FC 7	FRU-15		Cervus elaphus	Cervus elaphus	bone	Left metacarpal	GrA-25060	11840	60	13765	13607	13688	0.17	5.9	689	219	Drucker et al. 2008	Drucker et al. 2011	No PF past or today	NA	NA
La Fru	France	45.45	5.78	Fru III K70 14	FRU-2		Cervus elaphus	Cervus elaphus	bone	Right metacarpal	GrA-22134	8630	70	9675	9536	9615	0.15	6	620	207	Drucker et al. 2008	Drucker et al. 2011	No PF past or today	NA	NA
La Fru	France	45.45	5.78	Fru I F25 386 c1c	FRU-13		Cervus elaphus	Cervus elaphus	bone	Left metacarpal	GrA-25054	11790	60	13751	13526	13655	0.15	6.6	772	245	Drucker et al. 2008	Drucker et al. 2011	No PF past or today	NA	NA
La Fru	France	45.45	5.78		FRU-11		Cervus elaphus	Cervus elaphus	bone	Bone	GrA-34354	12200	50	14161	14050	14108	0.16	2.6	698	227	Drucker et al. 2011	Drucker et al. 2011	No PF past or today	NA	NA
La Garenne	France	45.66	5.26	none	ALP-6		Rangifer	Rangifer tarandus	bone	bone	OxA-8163(Ly-702)	13150	110	15951	15623	15780	0.16	-0.4	496	171	Bridault et al. 2000	Drucker et al. 2012	No PF past or today	NA	NA
La Grande Rivoire	France	45.21	5.64	GRiv-6 55 B3	GRV-9		Cervus elaphus	Cervus elaphus	bone	Tibia	GrA25066	7435	45	8324	8192	8263	0.16	3.9	692	221	Drucker et al. 2008	Drucker et al. 2011	No PF past or today	NA	NA
La Grande Rivoire	France	45.21	5.64	178	GRV-1		Cervus elaphus	Cervus elaphus	bone	Tibia	GrA25064	9160	50	10378	10241	10327	0.15	6.4	749	234	Drucker et al. 2008	Drucker et al. 2011	No PF past or today	NA	NA
La Plaisance/Belloy-sur-Somme	France	49.9664	2.1339	B 150 H6 5394	BEL-3		Bos/Bison	Bos primigenius	bone	Metacarpus R	Erl-9387	9810	70	11310	11174	11230	0.14	11.2	625	181	Drucker et al. 2020	Drucker et al. 2020	PF at LGM not today	no	NA
La Vierge Catherine/Saleux	France	49.8592	2.2389	Sa 114 R6 1557 sommet LGVG	SA-2		Capreolus	Capreolus capreolus	bone	Tibia	Erl-9391	9380	65	10692	10511	10604	0.15	8.3	680	208	Drucker et al. 2020	Drucker et al. 2020	PF at LGM not today	yes	NA
La Vierge Catherine/Saleux	France	49.8592	2.2389	Sa 114 Q5 2818 LGVG	SA-1		Cervus elaphus	Cervus elaphus	bone	Metacarpus	GrA-25195	9990	50	11610	11316	11466	0.16	6.8	631	195	Drucker et al. 2020	Drucker et al. 2020	PF at LGM not today	yes	NA
Ladoga	Russia	59.58	30.55		OxA-18471		Mammuthus	Mammuthus primigenius	tooth	tooth	OxA-18471	36690	300	41855	41377	41610	0.17	-6.47	688.247	210.317	Palkopoulou et al. 2013	This study	PF at LGM not today	no	ORAU collagen left over from 14C dating
Le Closeau	France	48.88	2.16	not specified level amas 4	UPN-506	A/LC/B/1	Equus	Equus Caballus	bone	not specified	OxA-5680	12090	90	14068	13809	13956	0.177716	2.47179	593.902	166.369	Stevens & Hedges 2004	This study	PF at LGM not today	yes	Collagen extracted for Reade et al. 2023 (N isotopes also reported in Reade et al. 2023)
Le Marais/Conty	France	49.74	2.15	Conty O17 base ToLi Rel 2	CTY4		Cervus elaphus	Cervus elaphus	bone	Femur	Erl-9394	9880	70	11395	11210	11309	0.18	8.5	586	177	Drucker et al. 2020	Drucker et al. 2020	PF at LGM not today	yes	NA
Lena-Amga	Russia	61	130		OxA-18602		Coelodonta	Coelodonta antiquitatis	bone	humerus/aDNA	OxA-18602	12135	45	14090	13882	14038	0.18	-2.79344	640.912	197.3	Stuart & Lister 2012	This study	PF throughout past 50,000 years	NA	ORAU collagen left over from 14C dating
Les Cabônes	France	47.15	5.71	RAN 89 Zg 258	RAN-2		Cervus elaphus	Cervus elaphus	bone	Left radius	GrA21524	8570	60	9595	9482	9539	0.15	1.1	818	248	Drucker et al. 2008	Drucker et al. 2011	PF at LGM not today	yes	NA
Les Douattes	France	46.02	5.95	D99 F554	LDT-600		Cervus elaphus	Cervus elaphus	bone	Metatarsal	GrA22132	12570	80	15119	14602	14916	0.14	-3.1	786	249	Drucker et al. 2008	Drucker et al. 2011	No PF past or today	no	NA
Les Plumettes, a Lussac-les-Chateaux	France	46.4038	0.7251	MG ED-01 (PLU II Rem c451-2 W176)	OxA-23085		Megaloceros	Megaloceros giganteus	bone	bone	OxA-23085	40600	1200	44550	42880	43872	0.13	14.2	880	269	Lister and Stuart, 2019	This study	No PF past or today	NA	Pre-extracted collagen from ORAU, N isotopes reported in Reade et al. 2023
Les Plumettes, a Lussac-les-Chateaux	France	46.4038	0.7251	MG ED-02 (PLU IV W400)	OxA-23086		Megaloceros	Megaloceros giganteus	tooth	tooth	OxA-23086	48700	3300	54923	49913	51313	0.14	12.1703	868.265	258.281	Lister and Stuart, 2019	This study	No PF past or today	NA	ORAU collagen left over from 14C dating
Links of Noltland, Westray	UK	59.326	-3.005	F4257	ORK1	SUERC-51170	Bos/Bison	Bos taurus	tooth	Maxillary P3 tooth	SUERC-51170	3973	35	4517	4411	4444	0.2	16.8	487	148	Fraser et al. 2017	Fraser et al. 2017	PF at LGM not today	no	NA
Links of Noltland, Westray	UK	59.326	-3.005	Ass F4462	ORK12	SUERC-51183	Bos/Bison	Bos taurus	bone	Metatarsus	SUERC-51183	4338	35	4960	4851	4908	0.2	17.4	488	152	Fraser et al. 2017	Fraser et al. 2017	PF at LGM not today	no	NA
Links of Noltland, Westray	UK	59.326	-3.005		ORK14	SUERC-51185	Bos/Bison	Bos taurus	bone	Proximal phalanx	SUERC-51185	4188	35	4832	4648	4724	0.1	17.6	425	129	Fraser et al. 2017	Fraser et al. 2017	PF at LGM not today	no	NA
Links of Noltland, Westray	UK	59.326	-3.005		ORK13	SUERC-51184	Bos/Bison	Bos taurus	bone	Humerus	SUERC-51184	4064	35	4781	4444	4549	0.2	17.7	446	135	Fraser et al. 2017	Fraser et al. 2017	PF at LGM not today	no	NA
Links of Noltland, Westray	UK	59.326	-3.005	F4462	ORK4	SUERC-51173	Bos/Bison	Bos taurus	tooth	MaxillaryP2 tooth	SUERC-51173	4228	35	4849	4656	4749	0.2	18.3	402	124	Fraser et al. 2017	Fraser et al. 2017	PF at LGM not today	no	NA
Links of Noltland, Westray	UK	59.326	-3.005	F4459	ORK6	SUERC-51175	Bos/Bison	Bos taurus	tooth	Maxillary P3 tooth	SUERC-51175	4217	35	4843	4655	4741	0.2	18.3	467	144	Fraser et al. 2017	Fraser et al. 2017	PF at LGM not today	no	NA
Links of Noltland, Westray	UK	59.326	-3.005		ORK10	SUERC-51181	Bos/Bison	Bos taurus	tooth	Maxillary M3 tooth	SUERC-51181	4158	35	4821	4621	4701	0.2	18.7	461	142	Fraser et al. 2017	Fraser et al. 2017	PF at LGM not today	no	NA
Links of Noltland, Westray	UK	59.326	-3.005	F4917	ORK2	SUERC-51171	Bos/Bison	Bos taurus	tooth	Mandibular M3 tooth	SUERC-51171	4236	36	4854	4658	4808	0.2	19.1	373	117	Fraser et al. 2017	Fraser et al. 2017	PF at LGM not today	no	NA
Links of Noltland, Westray	UK	59.326	-3.005	F6693	ORK3	SUERC-51172	Bos/Bison	Bos taurus	tooth	Maxillary M1 tooth	SUERC-51172	4256	35	4860	4735	4836	0.2	19.2	407	125	Fraser et al. 2017	Fraser et al. 2017	PF at LGM not today	no	NA
Links of Noltland, Westray	UK	59.326	-3.005		ORK9	SUERC-51180	Bos/Bison	Bos taurus	bone	Radius	SUERC-51180	4158	35	4821	4621	4701	0.2	19.4	386	117	Fraser et al. 2017	Fraser et al. 2017	PF at LGM not today	no	NA
Links of Noltland, Westray	UK	59.326	-3.005	F8442	ORK7	SUERC-51176	Bos/Bison	Bos taurus	tooth	Mandibular M1 tooth	SUERC-51176	3970	35	4517	4409	4440	0.2	19.6	432	136	Fraser et al. 2017	Fraser et al. 2017	PF at LGM not today	no	NA
Links of Noltland, Westray	UK	59.326	-3.005	F4460	ORK5	SUERC-51174	Bos/Bison	Bos taurus	tooth	Maxillary M2 tooth	SUERC-51174	4299	35	4951	4833	4859	0.2	19.9	451	139	Fraser et al. 2017	Fraser et al. 2017	PF at LGM not today	no	NA
Links of Noltland, Westray	UK	59.326	-3.005		ORK8	SUERC-51182	Bos/Bison	Bos taurus	bone	Radius	SUERC-51182	4039	35	4570	4426	4499	0.2	20.8	454	141	Fraser et al. 2017	Fraser et al. 2017	PF at LGM not today	no	NA
Los Avellanos II	Spain	43.35	-4.18	Surface	AVE02	SUC363	Bos/Bison	Bos tarus	bone	Femur	OxA-38410	1128	18	1059	977	1015	0.24	14.8	473	150	González-Rabanal et al. 2020	González-Rabanal et al. 2020	No PF past or today	NA	NA
Lugovoskoe	Russia	68.53	60.95		OxA-12031		Mammuthus	Mammuthus primigenius	tooth	tooth	OxA-12031	13205	60	15955	15755	15853	0.25	-1.5112	483.392	144.33	Barnes et al. 2007	This study	PF throughout past 50,000 years	NA	ORAU collagen left over from 14C dating
Lugovoskoe	Russia	68.53	60.95		OxA-12030		Mammuthus	Mammuthus primigenius	bone	bone	OxA-12030	13455	60	16311	16114	16210	0.2	2.6	526	158	Barnes et al. 2007	This study	PF throughout past 50,000 years	NA	ORAU collagen left over from 14C dating
Lugovoskoe	Russia	68.53	60.95		OxA-12029		Mammuthus	Mammuthus primigenius	bone	bone	OxA-12029	13450	50	16296	16121	16205	0.23	2.60967	489.901	152.472	Barnes et al. 2007	This study	PF throughout past 50,000 years	NA	ORAU collagen left over from 14C dating
Lynx Cave	UK	53.17	-3.21	2015.11H/126 layer c/d	UPN-808		Rangifer	Rangifer tarandus	bone	humerus	OxA-7993	11145	45	13156	13000	13079	0.2	13.7	606	180	Blore 2012	Stevens et al. 2021	PF at LGM not today	no	NA
Lynx Cave	UK	53.17	-3.21	940 Layer D	UPN-906	OxA-16854	Rangifer	Rangifer tarandus	bone	humerus	OxA-16854	11700	90	13738	13460	13561	0.18	13.8	654	199	Blore 2012	Stevens et al. 2021	PF at LGM not today	no	NA
Lynx Cave	UK	53.17	-3.21	83.98H/13/B Layer C/D 620	UPN-829		Bos/Bison	Bos primigenius	bone	left femur	OxA-12884	11245	65	13224	13095	13150	0.2	7.4	709	211	Currant & Jacobi, 2011	Stevens et al. 2021	PF at LGM not today	no	NA
Lynx Cave	UK	53.17	-3.21	2015.11H/106.5 622, articulates with tibia	UPN-827		Cervus elaphus	Cervus elaphus	bone	astragalus	OxA-19206	11640	45	13580	13458	13499	0.2	8.1	760	227	Jacobi & Higham 2011	Stevens et al. 2021	PF at LGM not today	no	NA
Lyuban, Novgorod Region	Russia	59.1	31.1		OxA-17152		Coelodonta	Coelodonta antiquitatis	bone	mandible	OxA-17152	28390	150	32877	32175	32529	0.2	-14.286	556.98	172.822	Stuart & Lister 2012	This study	PF at LGM not today	no	ORAU collagen left over from 14C dating
Magadan	Russia	62.77	148.16		OxA-17087		Coelodonta	Coelodonta antiquitatis	tooth	tooth/aDNA	OxA-17087	26160	110	30713	30175	30391	0.18	-2.90745	631.059	191.868	Stuart & Lister 2012	This study	PF throughout past 50,000 years	NA	ORAU collagen left over from 14C dating
Magheramorne, Larne Lough	Ireland	54.82	-5.77		OxA-11684		Megaloceros	Megaloceros giganteus	bone	left metatarsal	OxA-11684	11730	70	13738	13495	13586	0.18	11.0751	684.599	213.328	Lister and Stuart, 2019	This study	PF at LGM not today	no	Pre-extracted collagen from ORAU, N isotopes reported in Reade et al. 2023
Mainz-Linsenberg	Germany	49.99	8.25	Sample 3. Linsenberg 2.	UPN-564	n/a	Coelodonta	Coelodonta antiquitatis	bone	metacarpus	OxA-X-2255-48	17460	140	21300	20908	21107	0.15797	-6.84781	735.554	216.164	Higham et al. 2011	This study	PF at LGM not today	yes	ORAU collagen left over from 14C dating
Maloarkhangelsk	Russia	52.65	36.783	NHMG-02	OxA-19488		Megaloceros	Megaloceros giganteus	bone	bone	OxA-19488	6832	33	7685	7618	7659	0.19	3.255	631.192	189.247	Lister and Stuart, 2019	This study	PF at LGM not today	yes	ORAU collagen left over from 14C dating
Maloarkhangelsk	Russia	52.65	36.783	NHMG-01	OxA-19487		Megaloceros	Megaloceros giganteus	bone	bone	OxA-19487	6829	33	7683	7618	7656	0.2	3.553	585.285	172.18	Lister and Stuart, 2019	This study	PF at LGM not today	yes	ORAU collagen left over from 14C dating
Mama River, near Lake Baikal	Russia	58.3	112.92		OxA-11842		Mammuthus	Mammuthus primigenius	tooth	ivory	OxA-11842	17740	90	21745	21381	21551	0.15	3.62563	774.815	240.788	Palkopoulou et al. 2013	This study	PF throughout past 50,000 years	NA	ORAU collagen left over from 14C dating
Maszycka	Poland	50.18	19.83	I-193 a-y d	UPN-738		Equus	Equus sp.	bone	tibia	OxA-V-3079-27C	12818	37	15368	15206	15296	0.138702	-11.915	856.14	260.891	Reade et al. 2023	This study	PF at LGM not today	yes	Collagen extracted for Reade et al. 2023 (N isotopes also reported in Reade et al. 2023)
Maszycka	Poland	50.18	19.83	I-193 a-y e	UPN-740		Equus	Equus sp.	tooth	upper cheek tooth (P3-M2)	OxA-V-3079-28C	13290	45	16053	15872	15968	0.146036	-10.6464	777.581	235.564	Reade et al. 2023	This study	PF at LGM not today	yes	Collagen extracted for Reade et al. 2023 (N isotopes also reported in Reade et al. 2023)
Maszycka	Poland	50.18	19.83	I-193 a-y v(?)	UPN-734		Equus	Equus sp.	bone	2nd phalange	OxA-V-3079-26C	13890	40	17000	16819	16895	0.1534	-5.64173	631.913	196.525	Reade et al. 2023	This study	PF at LGM not today	yes	Pre-extracted collagen from ORAU, N isotopes reported in Reade et al. 2023
Maszycka	Poland	50.18	19.83	I-207 a-z a	UPN-741		Rangifer	Rangifer tarandus	bone	humerus	OxA-V-3079-29C	13160	40	15859	15704	15787	0.181287	-4.56254	473.736	146.36	Reade et al. 2023	This study	PF at LGM not today	yes	Pre-extracted collagen from ORAU, N isotopes reported in Reade et al. 2023
Merlemont/Warluis	France	49.388	2.141	E96 NE 75	WRL-11		Sus	Sus scrofa	bone	Humerus	GrA-23550	8830	60	10120	9747	9900	0.19	-0.8	596	180	Coutard et al. 2010	Drucker et al. 2020	PF at LGM not today	yes	NA
Merlemont/Warluis	France	49.388	2.141	ZA 66 SE 1948	WRL-12		Sus	Sus scrofa	bone	Femur	GrA-23542	9090	70	10369	10187	10257	0.19	4.3	594	180	Coutard et al. 2010	Drucker et al. 2020	PF at LGM not today	yes	NA
Merlemont/Warluis	France	49.388	2.141		WRL-16		Sus	Sus scrofa	bone	Humerus	ETH-64389	9500	40	11064	10686	10769	0.18	-1.5	609	186	Drucker et al. 2020	Drucker et al. 2020	PF at LGM not today	yes	NA
Mezhyrich	Ukraine	49.63	31.43	MzH07Â Fosse 6 (C2) Layer Z Kv23v N9	MZHOS07-09	MZHOS07-09	Mammuthus	Mammuthus primigenius	bone	humerus	GrA-38810	14750	50	18188	18016	18088	0.15	-1.9	740	223	Haesaerts et al. 2015	Drucker et al. 2018	PF at LGM not today	yes	NA
Miesenhiem	Germany	50.4	7.41		UPN-529		Alces	Alces alces	bone	rib	OxA-X-2461-6	11100	45	13094	12970	13018	0.235979	-4.35109	495.822	147.978	Fiedel et al. 2013	This study	PF at LGM not today	no	Pre-extracted collagen from ORAU, N isotopes reported in Reade et al. 2023
Mollendruz/Abri Freymond	Switzerland	46.69	6.46		OxA-9460 (Lyon-1135)		Rangifer	Rangifer tarandus	bone	left scaphoid	OxA-9460 (Lyon-1135)	12780	80	15366	15114	15252	0.15	-6.5	639	217	Bridault et al. 2000	Drucker et al. 2012	PF at LGM not today	no	NA
Molodo R., the first terrace	Russia	69.2	123		OxA-18603		Coelodonta	Coelodonta antiquitatis	tooth	upper tooth/aDNA	OxA-18603	12395	50	14818	14306	14496	0.16	0.616489	716.79	220.688	Stuart & Lister 2012	This study	PF throughout past 50,000 years	NA	ORAU collagen left over from 14C dating
Monruz	Switzerland	47	6.96	Area 1 O49 (784) sample number/square is uncertain	UPN-195		Equus	Equus sp.	bone	metatarsal	OxA-V-3072-19C	12825	80	15456	15186	15320	0.21	-14.3	500	149	Reade et al. 2023	Reade et al. 2020b	PF at LGM not today	no	NA
Monruz	Switzerland	47	6.96	Area 1 K48 (102), L48 (182), groupe 37	UPN-187		Rangifer	Rangifer tarandus	bone	right metatarsal	OxA-V-3058-18C	12666	32	15162	15030	15099	0.24	-11.2	490	146	Reade et al. 2023	Reade et al. 2020b	PF at LGM not today	no	NA
Mother Grundy's Parlour	UK	53.26	-1.2	M41955	UPN-312	TMG7	Equus	Equus ferus	tooth	Left M1/M2	OxA-19506	12155	50	14117	13887	14059	0.14	-2.26756	814.466	247.666	This study	This study	PF at LGM not today	no	ORAU collagen left over from 14C dating. Sample submitted for dating by Roger Jacobi for AHOB project. Published here with the permission of Chris Stringer & AHOB project.
Mother Grundy's Parlour	UK	53.26	-1.2	Enamel sample code TMG1, MGP1 (LK29) M82672	UPN-309	TMG1	Equus	Equus ferus	tooth	Left P2	OxA-19505	12545	50	15039	14615	14896	0.16	-1.79764	710.815	218.468	Jacobi & Higham 2011	This study	PF at LGM not today	no	Pre-extracted collagen from ORAU, N isotopes reported in Reade et al. 2023
Nadymskoe, Urals	Russia	66.05	66.08		OxA-10932		Mammuthus	Mammuthus primigenius	bone	bone	OxA-10932	45500	1000	49002	46635	47972	0.18	2.52741	686.257	209.367	Lister & Stuart in prep	This study	PF throughout past 50,000 years	NA	ORAU collagen left over from 14C dating
Nanna's Cave	UK	51.64	-4.68	91.9H/112	UPN-752		Rangifer	Rangifer tarandus	bone	phalange	OxA-V-3079-18C	26750	150	31108	30914	31001	0.156482	13.1316	773.061	227.735	Reade et al. 2023	This study	PF at LGM not today	no	Collagen extracted for Reade et al. 2023 (N isotopes also reported in Reade et al. 2023)
Nanna's Cave	UK	51.64	-4.68	63.335/61.8	UPN-813		Bos/Bison	Bos/Bison	tooth	Tooth	OxA-V-3152-14C	2702	19	2845	2761	2796	0.201693	16.5307	594.848	178.711	This study	This study	PF at LGM not today	no	This study: UCL (AG for isotopes, collagen later ultrafiltered for dating) ; Collagen extraction method detailed in Reade et al. 2023
Nanna's Cave	UK	51.64	-4.68	91.9H/211	UPN-751		Bos/Bison	Bos/Bison	bone	unknown	OxA-V-2794-35C	2710	30	2847	2765	2808	0.179599	17.9853	636.8	194.343	This study	This study	PF at LGM not today	no	This study: UCL (AF); Collagen extraction method detailed in Reade et al. 2023
Nanna's Cave	UK	51.64	-4.68	91.9H/201.1	UPN-753		Bos/Bison	Bos/Bison	bone	rib	OxA-V-2794-36C	1700	30	1687	1544	1587	0.172387	18.7394	682.691	210.129	This study	This study	PF at LGM not today	no	This study: UCL (AF); Collagen extraction method detailed in Reade et al. 2023
Nanna's Cave	UK	51.64	-4.68	63.335/61.9	UPN-810		Bos/Bison	Bos/Bison	tooth	Tooth	OxA-V-3152-13C	1259	18	1264	1208	1227	0.20764	19.1498	585.784	172.674	This study	This study	PF at LGM not today	no	This study: UCL (AG for isotopes, collagen later ultrafiltered for dating) ; Collagen extraction method detailed in Reade et al. 2023
Nanna's Cave	UK	51.64	-4.68	63-335/61.4	UPN-754		Equus	Equus sp.	tooth	tooth LM3	OxA-V-3079-19C	2436	20	2669	2369	2464	0.162268	17.3873	736.303	217.937	This study	This study	PF at LGM not today	no	This study: UCL (AG for isotopes, collagen later ultrafiltered for dating) ; Collagen extraction method detailed in Reade et al. 2023
Nanna's Cave	UK	51.64	-4.68	63.335/61.	UPN-814		Rangifer	Rangifer tarandus	tooth	Tooth	OxA-V-3152-15C	10251	29	11996	11839	11934	0.151194	15.8459	785.623	236.21	This study	This study	PF at LGM not today	no	This study: UCL (AG for isotopes, collagen later ultrafiltered for dating) ; Collagen extraction method detailed in Reade et al. 2023
Neale's Cave, Paignton	UK	50.42	-3.58	m22093 layer3 area ix	UPN-866	UPN-866, OxA-20870, OxA-6670	Equus	Equus sp.	bone	3rd metacarpal	OxA-20870	10345	50	12447	12002	12189	0.122978	9.6848	892.051	273.962	Reade et al. 2023	This study	PF at LGM not today	no	Collagen extracted for Stevens 2005 (N isotopes also reported in Reade et al. 2023)
near Kilmarnock	UK	55.58	-4.42		OxA-10966		Mammuthus	Mammuthus primigenius	tooth	ivory	OxA-10966	33070	290	38199	37070	37688	0.2	10.5	606	179	Lister & Stuart in prep	This study	PF at LGM not today	no	ORAU collagen left over from 14C dating
near Kilmarnock	UK	55.58	-4.42	L286	OxA-20051		Mammuthus	Mammuthus primigenius	tooth	ivory	OxA-20051	45850	750	49018	47144	48264	0.18	10.3445	694.385	207.876	Palkopoulou et al. 2013	This study	PF at LGM not today	no	ORAU collagen left over from 14C dating
near Tartu	Estonia	58.4	26.75		OxA-11181		Mammuthus	Mammuthus primigenius	tooth	ivory	OxA-11181	4091	36	4795	4522	4600	0.17	7.90885	674.152	202.754	Stuart et al. 2002	This study	PF at LGM not today	no	ORAU collagen left over from 14C dating
New Siberian Islands	Russia	74	138		OxA-11748		Mammuthus	Mammuthus primigenius	tooth	ivory	OxA-11748	36610	360	41841	41297	41558	0.25	5.54804	488.47	143.483	Barnes et al. 2007	This study	PF throughout past 50,000 years	NA	ORAU collagen left over from 14C dating
New Siberian Islands	Russia	73.36	141.33		OxA-17053		Coelodonta	Coelodonta antiquitatis	bone	mandible	OxA-17053	29320	150	34143	33740	33922	0.17	2.81134	694.319	210.146	Stuart & Lister 2012	This study	PF throughout past 50,000 years	NA	ORAU collagen left over from 14C dating
New Siberian Islands	Russia	73.36	141.33		OxA-17050		Coelodonta	Coelodonta antiquitatis	tooth	molar	OxA-17050	13335	50	16146	15951	16041	0.19	4.20759	600.033	181.587	Stuart & Lister 2012	This study	PF throughout past 50,000 years	NA	ORAU collagen left over from 14C dating
Niederbieber II	Germany	50.47	7.47	Sample 15: 71/77 -3 (FlÃ¤che II)	UPN-520		Alces	Alces alces	bone	Bone	OxA-V-2762-45C	10830	50	12821	12732	12763	0.131258	1.18155	589.623	172.441	Reade et al. 2023	This study	PF at LGM not today	no	Collagen extracted for Reade et al. 2023 (N isotopes also reported in Reade et al. 2023)
Niederbieber II	Germany	50.47	7.47	Sample 14: 34/37 -8 (FlÃ¤che I)	UPN-519		Cervus elaphus	Cervus elaphus	bone	Bone	OxA-V-2776-20C	11250	50	13171	13104	13146	0.154413	-0.168057	605.495	183.929	Reade et al. 2023	This study	PF at LGM not today	no	Collagen extracted for Reade et al. 2023 (N isotopes also reported in Reade et al. 2023)
Niederbieber II	Germany	50.47	7.47	Sample 19: 54/18 -6 (FlÃ¤che IV)	UPN-521		Cervus elaphus	Cervus elaphus	bone	Bone, shaft fragment	OxA-V-2776-21C	11170	50	13161	13075	13101	0.140747	3.22357	667.904	200.229	Reade et al. 2023	This study	PF at LGM not today	no	Collagen extracted for Reade et al. 2023 (N isotopes also reported in Reade et al. 2023)
Niederbieber II	Germany	50.47	7.47		UPN-533	n/a	Equus	Equus sp.	bone	astragalus	OxA-1135	11130	130	13161	12904	13025	0.139395	2.07141	841.715	253.098	Street et al. 1994	This study	PF at LGM not today	no	Collagen extracted for Reade et al. 2023 (N isotopes also reported in Reade et al. 2023)
Nizhnie Gari, Urals	Russia	58.17	56.57		OxA-11066		Coelodonta	Coelodonta antiquitatis	bone	cranium	OxA-11066	36050	400	41455	40757	41129	0.17	2.71963	659.583	197.123	Stuart & Lister 2012	This study	PF at LGM not today	beyond loess map extent	ORAU collagen left over from 14C dating
Nizhnyaya Tavda	Russia	57.68	66.2		OxA-11101		Coelodonta	Coelodonta antiquitatis	bone	mandible	OxA-11101	47200	1800	52380	47890	50399	0.15	-5.38081	665.813	201.865	Stuart & Lister 2012	This study	PF at LGM not today	beyond loess map extent	ORAU collagen left over from 14C dating
NW Mongolia, Upper Yenisei Basin	Mongolia	52	90		OxA-21003		Mammuthus	Mammuthus primigenius	tooth	tooth	OxA-21003	33120	340	38381	37105	37826	0.17	4.3427	701.84	220.509	Palkopoulou et al. 2013	This study	PF throughout past 50,000 years	NA	ORAU collagen left over from 14C dating
Oberlarg/Mannlefelsen I	France	47.46	7.24		OB-5		Cervus elaphus	Cervus elaphus	bone	bone	GrA-35594	9365	45	10655	10510	10583	0.2	5.8	601	191	Drucker et al. 2011	Drucker et al. 2011	PF at LGM not today	no	NA
Oberlarg/Mannlefelsen I	France	47.46	7.24		OB-15		Cervus elaphus	Cervus elaphus	bone	bone	GrA-35604	6600	45	7561	7432	7492	0.2	10	617	186	Drucker et al. 2011	Drucker et al. 2011	PF at LGM not today	no	NA
Obukhov Town	Ukraine	50.1099	30.6299		OxA-11974		Mammuthus	Mammuthus primigenius	bone	bone	OxA-11974	13945	50	17051	16904	16968	0.16	-5.78955	755.235	227.132	Barnes et al. 2007	This study	PF at LGM not today	yes	ORAU collagen left over from 14C dating
Ostorf-Tannenwerder island cemetery site, Mecklenburg Lake District	Germany	53.61	11.42		46920*OI		Capreolus	Roe deer	tooth	Dentin	KIA-46920	4594	31	5440	5293	5316	0.2	0	552	166	Fernandes et al. 2015	Fernandes et al. 2015	PF at LGM not today	no	NA
Ostorf-Tannenwerder island cemetery site, Mecklenburg Lake District	Germany	53.61	11.42		46907*OI		Cervid	Deer	tooth	Dentin	KIA-46907	4504	24	5288	5054	5159	0.2	7.2	573	172	Fernandes et al. 2015	Fernandes et al. 2015	PF at LGM not today	no	NA
Ostorf-Tannenwerder island cemetery site, Mecklenburg Lake District	Germany	53.61	11.42		46914*OI		Sus	Wild boar	tooth	Dentin	KIA-46914	4470	37	5279	4986	5144	0.2	8.7	605	183	Fernandes et al. 2015	Fernandes et al. 2015	PF at LGM not today	no	NA
Outlook Cave	UK	51.24	-2.68	ebbor juvenille	UPN-893	A/OLC/B/7	Rangifer	Rangifer tarandus	bone	not given	OxA-V-3152-16C	9945	29	11395	11269	11337	0.1488	2.47599	696.211	213.723	This study	This study	PF at LGM not today	no	Collagen extracted for Stevens 2005 (N isotopes also reported in Reade et al. 2023)
Pelvozh, Urals	Russia	66.23	66.38		OxA-10912		Mammuthus	Mammuthus primigenius	bone	bone	OxA-10912	16270	80	19815	19524	19653	0.23	-0.568563	523.218	160.699	Lister & Stuart in prep	This study	PF throughout past 50,000 years	NA	ORAU collagen left over from 14C dating
Pershinskaya 1 Cave	Russia	57.45	61.27		OxA-10928		Coelodonta	Coelodonta antiquitatis	bone	skull frag./aDNA	OxA-10928	13575	65	16497	16283	16388	0.14	0.416752	819.63	248.427	Rey-Iglesia et al. 2021	This study	PF at LGM not today	beyond loess map extent	ORAU collagen left over from 14C dating
Pershinskaya 1 Cave	Russia	57.27	61.27		OxA-20263		Coelodonta	Coelodonta antiquitatis	bone	radius shaft	OxA-20263	13165	55	15887	15698	15796	0.16	0.162457	730.472	225.154	Stuart & Lister 2012	This study	PF at LGM not today	beyond loess map extent	ORAU collagen left over from 14C dating
Picken's Hole	UK	51.29	-2.88		OxA-10804		Coelodonta	Coelodonta antiquitatis	bone	shaft of left femur	OxA-10804	40200	700	43990	42910	43506	0.15	12.4575	814.188	247.415	Jacobi et al. 2009	This study	PF at LGM not today	no	Pre-extracted collagen from ORAU, N isotopes reported in Reade et al. 2023
Pin Hole	UK	53.26	-1.19		OxA-13881		Coelodonta	Coelodonta antiquitatis	tooth	Rp3	OxA-13881	45000	750	48105	46455	47350	0.13	4.86101	898.48	275.499	Jacobi et al. 2009	This study	PF at LGM not today	no	Pre-extracted collagen from ORAU, N isotopes reported in Reade et al. 2023
Pin Hole	UK	53.26	-1.19		OxA-13592		Coelodonta	Coelodonta antiquitatis	tooth	Rp4	OxA-13592	43350	650	46285	45064	45787	0.14	12.8929	882.381	282.035	Jacobi et al. 2009	This study	PF at LGM not today	no	Pre-extracted collagen from ORAU, N isotopes reported in Reade et al. 2023
Pin Hole	UK	53.26	-1.19		OxA-14719		Coelodonta	Coelodonta antiquitatis	bone	ulna	OxA-14719	49000	1300	54687	50580	52252	0.14	5.07585	838.648	266.547	Jacobi et al. 2009	This study	PF at LGM not today	no	ORAU collagen left over from 14C dating
Pixie's Hole	UK	50.6	-3.6	PxHT5-37 (M100142) T5	UPN-018	n/a	Bos/Bison	Auroch? ID uncertain	bone	Large fragment (scapula?)	OxA-V-3149-8C	12417	34	14823	14330	14524	0.15	0.113468	819.1	239.438	Reade et al. 2023	This study	PF at LGM not today	no	Collagen extracted for Reade et al. 2023 (N isotopes also reported in Reade et al. 2023)
Pixie's Hole	UK	50.6	-3.6	P4-39	UPN-365	A/PIX/B/2, OxA-5794	Bos/Bison	Bos sp.	bone	scapula	OxA-V-3083-8C	12335	40	14793	14166	14325	0.166379	3.51819	500.654	150.469	Reade et al. 2023	This study	PF at LGM not today	no	Collagen extracted for Reade et al. 2023 (N isotopes also reported in Reade et al. 2023)
Pixie's Hole	UK	50.6	-3.6	PxH T4-2	UPN-364	A/PIX/B/3, OxA-5795	Bos/Bison	Bos sp.	bone	metacarpal	OxA-V-3076-7C	12320	35	14776	14159	14270	0.196264	5.24114	552.493	172.969	Reade et al. 2023	This study	PF at LGM not today	no	Collagen extracted for Reade et al. 2023 (N isotopes also reported in Reade et al. 2023)
Pixie's Hole	UK	50.6	-3.6	PxHP4-78 (M100130) P4	UPN-008	n/a	Cervid	Cervid	bone	Metatarsal	OxA-V-3148-37C	11171	32	13153	13085	13104	0.13	11.9334	887.937	255.442	Reade et al. 2023	This study	PF at LGM not today	no	Collagen extracted for Reade et al. 2023 (N isotopes also reported in Reade et al. 2023)
Pixie's Hole	UK	50.6	-3.6	PXH 45-16	UPN-366	A/PIX/B/4, OxA-5796	Cervus elaphus	Cervus elaphus	bone	pelvis	OxA-V-3076-8C	11870	35	13789	13613	13701	0.192025	6.60182	560.33	175.04	Reade et al. 2023	This study	PF at LGM not today	no	Collagen extracted for Reade et al. 2023 (N isotopes also reported in Reade et al. 2023)
Pixie's Hole	UK	50.6	-3.6	T4 PxHT4-60 (M100141)	UPN-016	UPN-016	Equus	Equus sp.	tooth	Premolar	OxA-V-3149-7C	42300	900	45781	44385	45078	0.13	0.247356	898.864	272.908	Reade et al. 2023	This study	PF at LGM not today	no	Collagen extracted for Reade et al. 2023 (N isotopes also reported in Reade et al. 2023)
Pixie's Hole	UK	50.6	-3.6	P4 PxHP4-28 (M100133)	UPN-009	UPN-009	Equus	Equus sp.	tooth	P2/M3	OxA-V-3148-38C	12502	36	14956	14573	14747	0.16	0.301075	638.145	197.741	Reade et al. 2023	This study	PF at LGM not today	no	Collagen extracted for Reade et al. 2023 (N isotopes also reported in Reade et al. 2023)
Podkamennaya, Tunguska River	Russia	61.6	90.1		OxA-17088		Coelodonta	Coelodonta antiquitatis	bone	mandible	OxA-17088	42950	550	45871	44964	45436	0.18	1.63739	650.206	196.405	Stuart & Lister 2012	This study	PF at LGM not today	beyond loess map extent	ORAU collagen left over from 14C dating
Pogon Palaeolithic Site	Ukraine	49.1672	25.4974		OxA-11746		Mammuthus	Mammuthus primigenius	bone	bone	OxA-11746	23560	40	27791	27701	27747	0.16	1.56797	785.632	237.224	Barnes et al. 2007	This study	PF at LGM not today	yes	ORAU collagen left over from 14C dating
Potter's Cave	UK	51.64	-4.68	91.7H/856	UPN-760		Equus	Equus sp.	bone	Pelvis	OxA-V-3138-18C	10817	27	12758	12738	12749	0.114479	15.7812	853.22	261.837	Reade et al. 2023	This study	PF at LGM not today	no	Collagen extracted for Reade et al. 2023 (N isotopes also reported in Reade et al. 2023)
Potter's Cave	UK	51.64	-4.68	91.7H.398	UPN-767		Rangifer	Rangifer tarandus	bone	bone	OxA-V-3079-25C	30080	220	34683	34319	34521	0.169923	5.76056	695.76	206.244	Reade et al. 2023	This study	PF at LGM not today	no	Collagen extracted for Reade et al. 2023 (N isotopes also reported in Reade et al. 2023)
Potter's Cave	UK	51.64	-4.68	91.7H.389	UPN-765		Rangifer	Rangifer tarandus	bone	phalange	OxA-V-3138-24C	29640	150	34371	34075	34211	0.166563	7.22085	721.58	212.124	Reade et al. 2023	This study	PF at LGM not today	no	Collagen extracted for Reade et al. 2023 (N isotopes also reported in Reade et al. 2023)
Potter's Cave	UK	51.64	-4.68	91.7H/974	UPN-763		Rangifer	Rangifer tarandus	bone	bone	OxA-V-3138-20C	31490	190	36100	35636	35848	0.15953	7.62556	742.053	221.565	Reade et al. 2023	This study	PF at LGM not today	no	Collagen extracted for Reade et al. 2023 (N isotopes also reported in Reade et al. 2023)
Potter's Cave	UK	51.64	-4.68	91.7H/870	UPN-762		Rangifer	Rangifer tarandus	bone	tibia	OxA-V-3149-17C	39150	600	43009	42410	42763	0.160873	10.2699	679.201	205.688	Reade et al. 2023	This study	PF at LGM not today	no	Collagen extracted for Reade et al. 2023 (N isotopes also reported in Reade et al. 2023)
Potter's Cave	UK	51.64	-4.68	91.7H.392	UPN-766		Rangifer	Rangifer tarandus	bone	bone	OxA-V-3138-25C	30000	160	34580	34325	34453	0.169451	13.4056	705.164	206.785	Reade et al. 2023	This study	PF at LGM not today	no	Collagen extracted for Reade et al. 2023 (N isotopes also reported in Reade et al. 2023)
Potter's Cave	UK	51.64	-4.68	91.7H/976	UPN-764		Rangifer	Rangifer tarandus	bone	bone	OxA-V-3079-24C	29860	220	34539	34197	34363	0.162232	14.3819	730.642	215.778	Reade et al. 2023	This study	PF at LGM not today	no	Collagen extracted for Reade et al. 2023 (N isotopes also reported in Reade et al. 2023)
Potter's Cave	UK	51.64	-4.68	91.7H.387	UPN-818		Rangifer	Rangifer tarandus	bone	bone	OxA-V-3138-26C	35650	340	41130	40509	40789	0.16968	14.6565	695.286	208.169	Reade et al. 2023	This study	PF at LGM not today	no	Collagen extracted for Reade et al. 2023 (N isotopes also reported in Reade et al. 2023)
Potter's Cave	UK	51.64	-4.68	91.7H/875	UPN-815		Rangifer	Rangifer tarandus	bone	phalange	OxA-V-3149-18C	40500	750	44187	43055	43676	0.156584	16.6106	730.226	216.679	Reade et al. 2023	This study	PF at LGM not today	no	Collagen extracted for Reade et al. 2023 (N isotopes also reported in Reade et al. 2023)
Praz Rodet	Switzerland	46.5667	6.1736		OxA-12982		Mammuthus	Mammuthus primigenius	tooth	ivory	OxA-12982	13705	55	16686	16453	16579	0.16	-6.58123	694.219	208.75	Barnes et al. 2007	This study	PF at LGM not today	no	ORAU collagen left over from 14C dating
Presles	Belgium	50.38	4.58	Pro. 728	UPN-367	A/PS/B/1	Cervus elaphus	Cervus elaphus	bone	mandible w/ M1-M3	OxA-1344	10950	200	13070	12751	12907	0.174193	-2.09051	568.933	200.844	Otte & Miller 1999	This study	PF at LGM not today	yes	Collagen extracted for Reade et al. 2023 (N isotopes also reported in Reade et al. 2023)
Prienai	Lithuania	54.86	25.83		OxA-12017		Coelodonta	Coelodonta antiquitatis	bone	maxilla frag.	OxA-12017	44950	650	48010	46540	47279	0.29	0.0433088	396.653	120.835	Stuart & Lister 2012	This study	PF at LGM not today	no	Pre-extracted collagen from ORAU, N isotopes reported in Reade et al. 2023
Pushkari IV (Bugorok)	Ukraine	49.1672	25.4974		OxA-17799		Mammuthus	Mammuthus primigenius	tooth	tooth	OxA-17799	14820	60	18235	18093	18156	0.14	-4.39036	807.219	243.102	Nadachowski et al 2018	This study	PF at LGM not today	yes	ORAU collagen left over from 14C dating
R Chepetsa	Russia	58.33	50.03		OxA-18472		Mammuthus	Mammuthus primigenius	tooth	tooth	OxA-18472	39060	350	42811	42496	42662	0.24	-3.59615	493.891	147.146	Palkopoulou et al. 2013	This study	PF at LGM not today	no	ORAU collagen left over from 14C dating
Raj Cave	Poland	50.83	20.5	cave sediments	OxA-11061		Megaloceros	Megaloceros giganteus	tooth	tooth	OxA-11061	42700	700	45788	44711	45305	0.16	2.29375	775.633	224.691	Stuart et al. 2004	This study	PF at LGM not today	yes	Pre-extracted collagen from ORAU, N isotopes reported in Reade et al. 2023
Rascov VII	Moldova	47.9537	28.8219		OxA-11689		Mammuthus	Mammuthus primigenius	tooth	tooth	OxA-11689	41400	700	44866	43434	44300	0.18	2.25285	627.631	188.785	Lister & Stuart in prep	This study	No PF past or today	NA	ORAU collagen left over from 14C dating
Reclau Viver	Spain	42.17	2.75	NÂ°621 RVS TIII N17	GER-11		Cervus elaphus	Cervus elaphus	bone	Dist tibia R	ETH-70644	21720	50	26000	25890	25948	0.14	12.3	804	234	Drucker et al. 2021	Drucker et al. 2021	No PF past or today	NA	NA
Reclau Viver	Spain	42.17	2.75	TV 300-320	KIA-33238		Cervus elaphus	Cervus elaphus	bone	Metapodial	KIA-33238	19730	90	23860	23450	23774	0.16	9.4	744	216	Soler & Soler 2016	Drucker et al. 2021	No PF past or today	NA	NA
Reindeer Rift, Cattedown (Plymouth)	UK	50.36	-4.12	R.R. (2) 8-6-74	UPN-331	OxA-17160	Rangifer	Rangifer tarandus	bone	calcaneum, sin.	OxA-17160	14550	55	17926	17565	17777	0.18	-4.76789	648.935	197.271	Jacobi & Higham 2009a	This study	PF at LGM not today	no	Collagen extracted for Reade et al. 2023 (N isotopes also reported in Reade et al. 2023)
Riparo Fumane	Italy	45.57	10.9	cave sediments	OxA-10524		Megaloceros	Megaloceros giganteus	bone	mandible	OxA-10524	34650	450	40321	39386	39853	0.15	4.75048	841.703	238.406	Stuart et al. 2004	This study	No PF past or today	NA	Pre-extracted collagen from ORAU, N isotopes reported in Reade et al. 2023
Robin Hood Cave	UK	53.26	-1.19		OxA-15484		Coelodonta	Coelodonta antiquitus	bone	shaft of left tibia	OxA-15484	40550	400	44033	43215	43652	0.14	4.93975	857.495	267.035	Jacobi et al. 2009	This study	PF at LGM not today	no	Pre-extracted collagen from ORAU, N isotopes reported in Reade et al. 2023
Robin Hood Cave	UK	53.26	-1.19	Box RH 201-221. Specimen is labelled 146 A1, USB/OB, Spit 12	UPN-690		Equus	Equus ferus	tooth	incisor	OxA-V-3050-36C/OxA-V-3050-37C	12301	63	14784	14094	14276	0.139837	-8.50634	809.239	250.41	Reade et al. 2023	This study	PF at LGM not today	no	Collagen extracted for Reade et al. 2023 (N isotopes also reported in Reade et al. 2023)
Robin Hood Cave	UK	53.26	-1.19	Box RH 63-69. Specimen is labelled 478. Level AO-OB, Spit 15	UPN-696	RHC/B/1	Equus	Equus ferus	tooth	incisor	OxA-V-2798-8C	12540	50	15028	14604	14884	0.131604	-7.20507	804.095	250.518	Reade et al. 2023	This study	PF at LGM not today	no	Collagen extracted for Reade et al. 2023 (N isotopes also reported in Reade et al. 2023)
Robin Hood Cave	UK	53.26	-1.19	RH 38 Level OB, Sq. A1	UPN-682	RHC/B/11, OxA-6323	Equus	Equus ferus	bone	left calcaneum	OxA-20697	10760	45	12751	12720	12734	0.131065	4.53241	852.101	262.143	Reade et al. 2023	This study	PF at LGM not today	no	Collagen extracted for Reade et al. 2023 (N isotopes also reported in Reade et al. 2023)
Robin Hood Cave	UK	53.26	-1.19	Box RH 97-120. Specimen is labelled 496 Layer OB, Sq. AO	UPN-697		Equus	Equus ferus	tooth	tooth	OxA-V-3079-17C	42000	900	45605	44135	44833	0.147208	6.28221	741.7	229.784	Reade et al. 2023	This study	PF at LGM not today	no	Collagen extracted for Reade et al. 2023 (N isotopes also reported in Reade et al. 2023)
Rochedane	France	47.35	6.77	Ro70 220 47/28	RCD-10800		Rangifer	Rangifer tarandus	bone	metapodial	OxA-8030 (Ly-709)	12420	75	14838	14323	14561	0.16	-2.8	621	196	Bridault et al. 2000	Drucker et al. 2012	PF at LGM not today	no	NA
Rochedane	France	47.35	6.77		RCD-5000		Cervus elaphus	Cervus elaphus	bone	left metatarsal	GrA-21518	10830	70	12823	12731	12778	0.17	2.7	629	195	Drucker et al. 2003	Drucker et al. 2011	PF at LGM not today	no	NA
Rochedane	France	47.35	6.77		RCD-2600		Cervus elaphus	Cervus elaphus	bone	left metatarsal	GrA-21516	11600	80	13577	13357	13458	0.16	3.3	656	204	Drucker et al. 2003	Drucker et al. 2011	PF at LGM not today	no	NA
Rochedane	France	47.35	6.77		RCD-6200		Cervus elaphus	Cervus elaphus	bone	left metatarsal	GrA-44339	9100	45	10286	10205	10249	0.2	7.2	559	175	Drucker et al. 2003	Drucker et al. 2011	PF at LGM not today	no	NA
Rochedane	France	47.35	6.77		RCD-6500		Cervus elaphus	Cervus elaphus	bone	left metatarsal	GrA-44340	7265	40	8167	8019	8096	0.2	9.7	719	222	Drucker et al. 2003	Drucker et al. 2011	PF at LGM not today	no	NA
Rochedane	France	47.35	6.77		RCD-10500		Cervus elaphus	Cervus elaphus	bone	right metacarpal	GrA-21522	6230	60	7248	7020	7116	0.19	8.4	599	201	Drucker et al. 2008	Drucker et al. 2011	PF at LGM not today	no	NA
Rolsogard near Aarhus Jutland	Denmark	56.3	10.77		OxA-10190		Mammuthus	Mammuthus primigenius	tooth	tooth	OxA-10190	41500	700	45010	43480	44388	0.19	-3.75075	634.207	191.204	Lister & Stuart in prep	This study	PF at LGM not today	no	ORAU collagen left over from 14C dating
Rosmos, near Aarhus Jutland	Denmark	56.3	10.77		OxA-10189		Mammuthus	Mammuthus primigenius	tooth	ivory	OxA-10189	33270	350	38711	37403	38057	0.14	1.89297	865.531	255.556	Stuart et al. 2002	This study	PF at LGM not today	no	ORAU collagen left over from 14C dating
Salehard, Urals	Russia	66.05	66.83		OxA-10919		Mammuthus	Mammuthus primigenius	bone	bone	OxA-10919	45500	1000	49002	46635	47972	0.19	-4.17317	643.247	190.362	Lister & Stuart in prep	This study	PF throughout past 50,000 years	NA	ORAU collagen left over from 14C dating
Sandalja	Croatia	44.9	13.83	CROA MG-01 (cat # 21)	OxA-23785		Megaloceros	Megaloceros giganteus	bone	bone	OxA-23785	14035	60	17252	16980	17076	0.13	3.35385	893.838	273.692	Lister and Stuart, 2019	This study	No PF past or today	NA	Pre-extracted collagen from ORAU, N isotopes reported in Reade et al. 2023
Schlutup, Lübeck Ost	Germany	53.87	10.69		OxA-10397		Megaloceros	Megaloceros giganteus	bone	femur from partial skeleton	OxA-10397	12050	70	14031	13809	13923	0.14	-7.26894	854.628	256.662	Stuart et al. 2004	This study	PF at LGM not today	no	Pre-extracted collagen from ORAU, N isotopes reported in Reade et al. 2023
Settepolesini	Italy	44.15	11.75		OxA-10496		Mammuthus	Mammuthus primigenius	bone	bone	OxA-10496	38550	550	42703	42260	42492	0.17	0.835675	684.158	202.987	Lister & Stuart in prep	This study	No PF past or today	NA	ORAU collagen left over from 14C dating
Settepolesini	Italy	44.15	11.75	sands and gravels of R Po	OxA-10497		Megaloceros	Megaloceros giganteus	bone	bone	OxA-10497	33700	350	39266	38083	38601	0.28	1.82465	418.994	123.612	Stuart et al. 2004	This study	No PF past or today	NA	Pre-extracted collagen from ORAU, N isotopes reported in Reade et al. 2023
Settepolesini	Italy	44.15	11.75		OxA-10521		Mammuthus	Mammuthus primigenius	bone	bone	OxA-10521	35800	500	41365	40460	40901	0.21	8.2	562	167	Stuart et al. 2002	This study	No PF past or today	NA	ORAU collagen left over from 14C dating
Sevsk	Russia	52.15	34.38		OxA-20059		Mammuthus	Mammuthus primigenius	bone	bone	OxA-20059	14095	55	17279	17056	17170	0.16	-2.40113	745.963	223.624	Palkopoulou et al. 2013	This study	PF at LGM not today	yes	ORAU collagen left over from 14C dating
Sewell's Cave	UK	54.09	-2.33	12468	UPN-335	OxA-16389	Equus	Equus sp.	bone	tibia	OxA-16389	10810	50	12810	12724	12752	0.15	9.25166	751.939	232.338	Lord et al. 2007	This study	PF at LGM not today	no	Pre-extracted collagen from ORAU, N isotopes reported in Reade et al. 2023
Sewell's Cave	UK	54.09	-2.33	MM107	UPN-850	OxA-33530	Equus	Equus sp.	bone	not given	OxA-33530	10070	45	11748	11405	11614	0.159146	4.48416	727.613	223.502	Marr 2017	This study	PF at LGM not today	no	Pre-extracted collagen from ORAU, N isotopes reported in Reade et al. 2023
Sewell's Cave	UK	54.09	-2.33	12468	UPN-334	A/SWC/B/1	Equus	Equus sp.	bone	metatarsal	OxA-20698	10925	50	12885	12762	12826	0.15	10.7932	762.794	234.422	O'Connor & Lord 2015	This study	PF at LGM not today	no	Pre-extracted collagen from ORAU, N isotopes reported in Reade et al. 2023
Sewell's Cave	UK	54.09	-2.33		UPN-336		Equus	Equus sp.	bone	tibia	OxA-V-2748-23C	11520	50	13446	13340	13391	0.16	5.54302	720.637	218.847	Reade et al. 2023	This study	PF at LGM not today	no	Collagen extracted for Reade et al. 2023 (N isotopes also reported in Reade et al. 2023)
Seyaha, Urals	Russia	70.15	70.25		OxA-10918		Mammuthus	Mammuthus primigenius	bone	bone	OxA-10918	31390	240	36040	35515	35768	0.18	1.31764	680.424	206.299	Lister & Stuart in prep	This study	PF throughout past 50,000 years	NA	ORAU collagen left over from 14C dating
Shelter Cave	UK	50.33	-4.02	KSC-96-12	UPN-911	OxA-18834	Rangifer	Rangifer tarandus	bone	right astragalus	OxA-18834	10270	50	12419	11833	11997	0.17	6.2	664	206	Reade et al. 2023	This study	PF at LGM not today	no	Pre-extracted collagen from ORAU, N isotopes reported in Reade et al. 2023
Shelter Cave	UK	50.33	-4.02	96-018 K.SH. 104. 22-7-96	UPN-315	OxA-V-2754-15C, OxA-7142	Rangifer	Rangifer tarandus	bone	metatasal, proximal left	OxA-V-2754-15C	10420	50	12581	12105	12299	0.16	14.3869	668.152	199.586	Reade et al. 2023	This study	PF at LGM not today	no	Collagen extracted for Reade et al. 2023 (N isotopes also reported in Reade et al. 2023)
Shulgovka Village	Ukraine	49.25	34.63	UMG-06	OxA-19655		Megaloceros	Megaloceros giganteus	bone	bone	OxA-19655	22870	100	27285	27155	27214	0.31	-13.9376	382.067	116.12	Lister and Stuart, 2019	This study	PF at LGM not today	yes	ORAU collagen left over from 14C dating
Sirgenstein, Blaubeuren	Germany	48.6497	10.2964		OxA-11420		Mammuthus	Mammuthus primigenius	tooth	ivory	OxA-11420	33950	450	39633	38271	38922	0.15	-4.37689	804.192	237.925	Lister & Stuart in prep	This study	PF at LGM not today	yes	ORAU collagen left over from 14C dating
Sirgenstein, Blaubeuren	Germany	48.6497	10.2964		OxA-11411		Mammuthus	Mammuthus primigenius	bone	bone	OxA-11411	33800	450	39413	37875	38694	0.16	1.04258	793.736	238.146	Lister & Stuart in prep	This study	PF at LGM not today	yes	ORAU collagen left over from 14C dating
Sous la Roche/Bavans	France	47.48	6.73	86 π2 déc12 n°13	BVN-2		Cervus elaphus	Cervus elaphus	bone	Jawbone	GrA-22131	6000	60	6934	6747	6840	0.15	8.6	656	197	Drucker et al. 2008	Drucker et al. 2011	PF at LGM not today	no	NA
Sous la Roche/Bavans	France	47.48	6.73		BVN-4(2)		Cervus elaphus	Cervus elaphus	bone	not given	GrA-23126	8590	60	9658	9490	9560	0.15	6.4	602	173	Drucker et al. 2011	Drucker et al. 2011	PF at LGM not today	no	NA
Spy	Belgium	50.48	4.67	IV2E 4207	GrA-44576	GrA-44576	Equus	Equus caballus	tooth	premolar/molar	GrA-44576	32810	250	37566	36862	37226	0.15	5.5	633	216	Semal et al. 2013	Wißing et al. 2019	PF at LGM not today	yes	NA
Starunia	Ukraine	48.72	24.5		OxA-11413		Coelodonta	Coelodonta antiquitatis	bone	skull	OxA-11413	42150	750	45491	44365	44929	0.21	-1.58305	579.849	170.05	Kuc et al. 2005	This study	PF at LGM not today	no	Pre-extracted collagen from ORAU, N isotopes reported in Reade et al. 2023
Stranska Skala	Czech Republic	49.19	16.67	SS. 23/IV 9.7 1986	UPN-626	SK7	Equus	Equus sp.	bone	metapodial	OxA-V-3079-30	19884	64	23950	23800	23885	0.17044	-13.3624	672.109	209.073	Reade et al. 2023	This study	PF at LGM not today	yes	Collagen extracted for Reade et al. 2023 (N isotopes also reported in Reade et al. 2023)
Stranska Skala	Czech Republic	49.19	16.67	SB ER2 56	UPN-628	SK9	Equus	Equus sp.	bone	metapodial	OxA-V-3079-31	19375	63	23692	23166	23322	0.178945	-7.40443	601.418	180.193	Reade et al. 2023	This study	PF at LGM not today	yes	Collagen extracted for Reade et al. 2023 (N isotopes also reported in Reade et al. 2023)
Stranska Skala	Czech Republic	49.19	16.67	S.S.6/II 5 15.7.1982	UPN-629	SK10	Equus	Equus sp.	bone	metapodial	OxA-V-3079-32	19441	65	23720	23255	23451	0.183019	-3.05993	583.26	177.221	Reade et al. 2023	This study	PF at LGM not today	yes	Collagen extracted for Reade et al. 2023 (N isotopes also reported in Reade et al. 2023)
Stranska Skala	Czech Republic	49.19	16.67	SS 3/IV-V 17.7.1986	UPN-631	SK12	Equus	Equus sp.	bone	metapodial	OxA-V-2776-23C	19670	80	23817	23431	23591	0.169625	-11.7469	659.624	201.355	Reade et al. 2023	This study	PF at LGM not today	yes	Collagen extracted for Reade et al. 2023 (N isotopes also reported in Reade et al. 2023)
Stranska Skala	Czech Republic	49.19	16.67	SS. V/S	UPN-632	SK13	Equus	Equus sp.	bone	metapodial	OxA-V-3079-33	19532	65	23749	23376	23517	0.218899	-2.88406	495.914	150.549	Reade et al. 2023	This study	PF at LGM not today	yes	Collagen extracted for Reade et al. 2023 (N isotopes also reported in Reade et al. 2023)
Stranska Skala	Czech Republic	49.19	16.67	SS V/5	UPN-633	SK14	Equus	Equus	bone	metapodial	OxA-V-3079-34	19802	66	23868	23776	23825	0.166396	-7.09017	673.633	205.95	This study	This study	PF at LGM not today	yes	This study: Cambridge for isotopes, collagen later ultrafiltered for dating,: Collagen extraction menthod detailed in Reade et al. 2023
Stranska Skala	Czech Republic	49.19	16.67	21/III 3.7.1986	UPN-635	SK16	Equus	Equus sp.	bone	metapodial	OxA-V-3079-35	19787	66	23860	23770	23816	0.179609	-12.1418	625.904	193.435	Reade et al. 2023	This study	PF at LGM not today	yes	Collagen extracted for Reade et al. 2023 (N isotopes also reported in Reade et al. 2023)
Sun Hole	UK	51.28	-2.76	No sample number (SH AMS 2)	UPN-257	OxA-14438	Equus	Equus ferus	bone	Shaft fragment of left tibia	OxA-14438	12545	55	15046	14605	14890	0.14	-9.19009	806.926	244.2	Jacobi & Higham 2009a	This study	PF at LGM not today	no	Collagen extracted for Reade et al. 2023 (N isotopes also reported in Reade et al. 2023)
Sun Hole	UK	51.28	-2.76	M5.2/32	UPN-264		Rangifer	Rangifer tarandus	bone	Scapula	OxA-V-3058-27C	11984	31	13995	13795	13906	0.17	-16.9263	660.435	197.476	Jacobi & Higham 2009a	This study	PF at LGM not today	no	Collagen extracted for Reade et al. 2023 (N isotopes also reported in Reade et al. 2023)
Sun Hole	UK	51.28	-2.76	M5.2/5	UPN-260		Rangifer	Rangifer tarandus	bone	Phalanx	OxA-V-3058-26C	10627	38	12706	12623	12665	0.19	10.9515	586.41	176.049	Jacobi & Higham 2009a	This study	PF at LGM not today	no	Collagen extracted for Reade et al. 2023 (N isotopes also reported in Reade et al. 2023)
Sun Hole	UK	51.28	-2.76	5th ft pleistocene or 6th ft pleistocene. C/6 under W wall M5.2/14.1	UPN-266		Equus	Equus ferus	tooth	Left M2 upper	OxA-V-3148-34C	12447	36	14900	14526	14601	0.12	-9.90305	862.994	261.328	Reade et al. 2023	This study	PF at LGM not today	no	Collagen extracted for Reade et al. 2023 (N isotopes also reported in Reade et al. 2023)
Sun Hole	UK	51.28	-2.76	M5.2.7	UPN-871	MM037	Equus	Equus ferus	bone	astragalus	OxA-V-3148-36C	9868	29	11276	11228	11257	0.143829	8.20802	852.172	252.914	Reade et al. 2023	This study	PF at LGM not today	no	Collagen extracted for Reade et al. 2023 (N isotopes also reported in Reade et al. 2023)
Sungir Palaeolithic Site	Russia	56.1722	40.5055		OxA-11747		Mammuthus	Mammuthus primigenius	bone	bone	OxA-11747	30420	250	35115	34577	34840	0.13	5.27095	857.716	253.285	Barnes et al. 2007	This study	PF at LGM not today	no	ORAU collagen left over from 14C dating
Szczecin	Poland	53.43	14.57		OxA-11058		Mammuthus	Mammuthus primigenius	bone	not given	OxA-11058	44100	1200	47810	45420	46726	0.16	-0.588324	702.305	210.634	Barnes et al. 2007	This study	PF at LGM not today	no	ORAU collagen left over from 14C dating
Szczecin	Poland	53.43	14.57		OxA-11059		Coelodonta	Coelodonta antiquitatis	bone	femur shaft	OxA-11059	28450	250	33042	32160	32614	0.14	-3.5971	833.292	245.994	Stuart & Lister 2012	This study	PF at LGM not today	no	Pre-extracted collagen from ORAU, N isotopes reported in Reade et al. 2023
Taagepera, South Estonia	Estonia	57.9825	25.6906		OxA-11564		Mammuthus	Mammuthus primigenius	tooth	not given	OxA-11564	42200	650	45402	44456	44947	0.19	-1.1024	671.32	199.808	Ukkonon et al. 2011	This study	PF at LGM not today	no	ORAU collagen left over from 14C dating
Taimyr	Russia	74.5	102		OxA-21046		Mammuthus	Mammuthus primigenius	tooth	tooth	OxA-21046	32580	200	37144	36594	36904	0.2	4.29217	588.031	181.393	Palkopoulou et al. 2013	This study	PF throughout past 50,000 years	NA	ORAU collagen left over from 14C dating
Three Holes Cave	UK	50.5	-3.67	THR FA 766	UPN-983	OxA-3890	Equus	Equus sp.	tooth	tooth	OxA-3890	12150	110	14187	13809	14065	0.15	7.9	736	223	Hedges et al. 1996	This study	PF at LGM not today	no	This study: UCL (AF); Collagen extraction method detailed in Reade et al. 2023
Three Holes Cave	UK	50.5	-3.67	P1709. 3H '57 II 8b	UPN-732	OxA-V-2777-57	Bos/Bison	Bos primigenius	bone	unknown	OxA-V-2777-57C	12310	60	14790	14101	14290	0.157276	3.34044	735.498	228.671	Reade et al. 2023	This study	PF at LGM not today	no	Collagen extracted for Reade et al. 2023 (N isotopes also reported in Reade et al. 2023)
Three Holes Cave	UK	50.5	-3.67	P1708. 3H '57 IL 8b, black band	UPN-731	OxA-V-2776-26C, OxA-1499	Equus	Equus sp.	tooth	upper tooth	OxA-V-2776-26C	12410	50	14823	14322	14526	0.146496	9.14083	759.038	228.177	Reade et al. 2023	This study	PF at LGM not today	no	Collagen extracted for Reade et al. 2023 (N isotopes also reported in Reade et al. 2023)
Three Holes Cave	UK	50.5	-3.67	THR685 context DGB, area 7.6	UPN-977	OxA-V-2798-19C	Cervus elaphus	Cervus elaphus	bone	right humerus shaft	OxA-V-2798-19C	12170	50	14139	14028	14074	0.164901	-6.626	743.628	216.313	This study	This study	PF at LGM not today	no	This study: UCL (AF); Collagen extraction method detailed in Reade et al. 2023
Three Holes Cave	UK	50.5	-3.67	THR FA 751, Previously OxA-3891, 11980 ±100	UPN-982	OxA-V-2798-23	Cervus elaphus	Cervus elaphus	bone	metatarsal	OxA-V-2798-23C	12090	50	14062	13859	13936	0.160227	-5.56934	735.501	219.148	This study	This study	PF at LGM not today	no	This study: UCL (AF); Collagen extraction method detailed in Reade et al. 2023
Three Holes Cave	UK	50.5	-3.67	THR FA 1133, Previously OxA-4478, 10020 ±80	UPN-981	OxA-V-2798-22	Cervus elaphus	Cervus elaphus	bone	humerus	OxA-V-2798-22C	10300	50	12432	11936	12079	0.17	5.2	720	208	This study	This study	PF at LGM not today	no	This study: UCL (AF); Collagen extraction method detailed in Reade et al. 2023
Three Holes Cave	UK	50.5	-3.67	THR FA 978, Previously OxA-4494, 12220 ±110	UPN-980	OxA-V-2798-21 OxA-4494	Equus	Equus sp.	tooth	upper left P2	OxA-V-2798-21C	12330	50	14792	14154	14327	0.150442	-11.9308	809.358	236.847	This study	This study	PF at LGM not today	no	This study: UCL (AF); Collagen extraction method detailed in Reade et al. 2023
Three Holes Cave	UK	50.5	-3.67	THR671	UPN-978	OxA-V-2798-20	Equus	Equus	tooth	tooth	OxA-V-2798-20C	12030	50	14014	13805	13915	0.140044	13.3556	770.954	229.17	This study	This study	PF at LGM not today	no	This study: UCL (AF); Collagen extraction method detailed in Reade et al. 2023
Torbryan Six Cave	UK	50.49	-3.67	10/ TB6FA 15	UPN-984	OxA-3896	Equus	Equus sp.	tooth	not given	OxA-3896	32100	630	37240	35709	36595	0.148113	13.1402	822.012	243.823	Hedges et al. 1996	This study	PF at LGM not today	no	This study: UCL (AF); Collagen extraction method detailed in Reade et al. 2023
Torbryan Six Cave	UK	50.49	-3.67	8/ TB6FA 24. cut marked	UPN-985	OxA-3894	Rangifer	Rangifer tarandus	tooth	not given	OxA-V-2798-24C	12330	50	14792	14154	14327	0.15	-11.8	791	234	This study	This study	PF at LGM not today	no	This study: UCL (AF); Collagen extraction method detailed in Reade et al. 2023
Trappeskov 2, Svendborg	Denmark	54.84	10.48		OxA-10663		Mammuthus	Mammuthus primigenius	tooth	not given	OxA-10663	27810	270	32013	31357	31760	0.1	0.959215	399.821	128.793	Brace 2011	This study	PF at LGM not today	no	ORAU collagen left over from 14C dating
Tropfsteinhöhle Kugelstein	Austria	47.23	15.34		OxA-10737		Coelodonta	Coelodonta antiquitatis	bone	vertebra	OxA-10737	44900	1800	49710	45529	47940	0.15	5.24517	678.516	195.512	Stuart & Lister 2012	This study	PF at LGM not today	no	Pre-extracted collagen from ORAU, N isotopes reported in Reade et al. 2023
Trou de Chaleux	Belgium	50.22	4.95	2342	UPN-479	A/CX/B/45	Equus	Equus caballus	bone	not given	OxA-3633	12880	100	15555	15255	15401	0.145474	-9.35429	789.584	242.692	Hedges et al. 1993	This study	PF at LGM not today	yes	Collagen extracted for Stevens & Hedges 2004 (N isotopes also reported in Reade et al. 2023)
Trou de Chaleux	Belgium	50.22	4.95	2345.6	UPN-673		Equus	Equus sp.	bone	metacarpal, right proximal	OxA-V-2748-41C	12380	50	14810	14265	14465	0.165426	-13.2593	690.621	208.607	Reade et al. 2023	This study	PF at LGM not today	yes	Collagen extracted for Reade et al. 2023 (N isotopes also reported in Reade et al. 2023)
Trou de Chaleux	Belgium	50.22	4.95	2298	UPN-397	A/CX/B/32	Equus	Equus caballus	bone	right scapula	OxA-V-2216-44	12630	55	15141	14969	15052	0.182218	-12.3812	622.953	185.18	Reade et al. 2023	This study	PF at LGM not today	yes	Collagen extracted for Reade et al. 2023 (N isotopes also reported in Reade et al. 2023)
Trou de Chaleux	Belgium	50.22	4.95	2305.1	UPN-666		Equus	Equus sp.	bone	radius, left distal	OxA-V-2755-43C	12580	50	15100	14887	14976	0.16307	-9.65808	677.192	206.074	Reade et al. 2023	This study	PF at LGM not today	yes	Collagen extracted for Reade et al. 2023 (N isotopes also reported in Reade et al. 2023)
Trou de Chaleux	Belgium	50.22	4.95	2345.4	UPN-671		Equus	Equus sp.	bone	metacarpal, right proximal	OxA-V-2755-45C	12140	50	14099	13879	14042	0.164493	-9.19108	705.469	210.066	Reade et al. 2023	This study	PF at LGM not today	yes	Collagen extracted for Reade et al. 2023 (N isotopes also reported in Reade et al. 2023)
Trou de Chaleux	Belgium	50.22	4.95	2345.8	UPN-675		Equus	Equus sp.	bone	metacarpal, right proximal	OxA-V-2755-46C	12570	50	15089	14860	14955	0.189816	-8.85189	593.753	179.001	Reade et al. 2023	This study	PF at LGM not today	yes	Collagen extracted for Reade et al. 2023 (N isotopes also reported in Reade et al. 2023)
Trou de Chaleux	Belgium	50.22	4.95	2345.2	UPN-669		Equus	Equus sp.	bone	metacarpal, right proximal	OxA-V-2755-44C	12300	50	14766	14106	14251	0.203364	-7.15826	576.599	172.675	Reade et al. 2023	This study	PF at LGM not today	yes	Collagen extracted for Reade et al. 2023 (N isotopes also reported in Reade et al. 2023)
Trou de Chaleux	Belgium	50.22	4.95	2596 30	UPN-452		Rangifer	Rangifer tarandus	bone	Right Metatarsus diaphysis	OxA-V-3149-19C	12474	33	14917	14523	14657	0.170493	-5.8134	672.581	201.993	Reade et al. 2023	This study	PF at LGM not today	yes	Collagen extracted for Reade et al. 2023 (N isotopes also reported in Reade et al. 2023)
Trou de Chaleux	Belgium	50.22	4.95	2596 60	UPN-450		Rangifer	Rangifer tarandus	bone	Right Metatarsus diaphysis	OxA-V-2748-40C	12180	50	14147	14036	14085	0.178119	-5.80267	650.317	195.347	Reade et al. 2023	This study	PF at LGM not today	yes	Collagen extracted for Reade et al. 2023 (N isotopes also reported in Reade et al. 2023)
Trou de Chaleux	Belgium	50.22	4.95	2596 40	UPN-451		Rangifer	Rangifer tarandus	bone	Left Metatarsus diaphysis	OxA-V-2755-41C	12460	50	14914	14455	14629	0.203577	-2.43245	551.881	167.033	Reade et al. 2023	This study	PF at LGM not today	yes	Collagen extracted for Reade et al. 2023 (N isotopes also reported in Reade et al. 2023)
Trou de Chaleux	Belgium	50.22	4.95	2596 62	UPN-448		Rangifer	Rangifer tarandus	bone	Metatarsus diaphysis	OxA-V-2755-40C	12580	50	15100	14887	14976	0.155373	-1.7769	721.051	221.482	Reade et al. 2023	This study	PF at LGM not today	yes	Collagen extracted for Reade et al. 2023 (N isotopes also reported in Reade et al. 2023)
Trou de Frontal	Belgium	50.21	4.96	DP2450	UPN-460	A/FRT/B/9, OxA-4197.	Equus	Equus caballus	bone	canon ant.	OxA-V-2798-9C	12680	60	15207	15022	15118	0.137829	-10.5674	822.479	244.841	Reade et al. 2023	This study	PF at LGM not today	yes	Collagen extracted for Stevens & Hedges 2004 (N isotopes also reported in Reade et al. 2023)
Trou de Frontal	Belgium	50.21	4.96	DP2449	UPN-370	A/FRT/B/3	Equus	Equus caballus	bone	scapula	OxA-V-2793-11C	12390	50	14816	14299	14485	0.162507	-9.77622	711.17	226.242	Reade et al. 2023	This study	PF at LGM not today	yes	Collagen extracted for Reade et al. 2023 (N isotopes also reported in Reade et al. 2023)
Trou de Frontal	Belgium	50.21	4.96	DP2449	UPN-369	A/FRT/B/2	Equus	Equus caballus	bone	scapula	OxA-V-3076-9C	12220	35	14156	14070	14120	0.163104	-8.89937	725.081	223.628	Reade et al. 2023	This study	PF at LGM not today	yes	Collagen extracted for Reade et al. 2023 (N isotopes also reported in Reade et al. 2023)
Trou de Frontal	Belgium	50.21	4.96	2447 1	UPN-453		Rangifer	Rangifer tarandus	bone	Left Metatarsus diaphysis	OxA-V-3079-36C	24250	110	28667	28319	28465	0.18235	-3.7696	639.468	190.342	Reade et al. 2023	This study	PF at LGM not today	yes	Collagen extracted for Reade et al. 2023 (N isotopes also reported in Reade et al. 2023)
Trou de Nutons	Belgium	50.21	4.96	DP5202	UPN-470	A/NUT/B/14	Equus	Equus caballus	bone	not given	OxA-4195	12630	140	15274	14579	14982	0.190046	0.640195	325.347	101.264	Hedges et al. 1994	This study	PF at LGM not today	yes	Collagen extracted for Stevens & Hedges 2004 (N isotopes also reported in Reade et al. 2023)
Trou de Nutons	Belgium	50.21	4.96	DP3220/22	UPN-462	A/NUT/B/1	Bos/Bison	Bison europa	bone	astragalus	OxA-V-2798-16C	12510	50	14978	14558	14789	0.172012	-9.9904	666.704	205.673	Reade et al. 2023	This study	PF at LGM not today	yes	Collagen extracted for Stevens 2005 (N isotopes also reported in Reade et al. 2023)
Trou de Nutons	Belgium	50.21	4.96	2544.1	UPN-676		Equus	Equus sp.	bone	humerus, left, impact	OxA-V-3058-13C	12981	33	15631	15462	15540	0.140722	-14.9148	804.496	241.451	Reade et al. 2023	This study	PF at LGM not today	yes	Collagen extracted for Reade et al. 2023 (N isotopes also reported in Reade et al. 2023)
Trou de Nutons	Belgium	50.21	4.96	2545.4	UPN-679		Equus	Equus sp.	bone	metatarsal, left distal, impact	OxA-V-3058-15C	12599	33	15089	14957	15018	0.128379	-12.4496	869.949	259.921	Reade et al. 2023	This study	PF at LGM not today	yes	Collagen extracted for Reade et al. 2023 (N isotopes also reported in Reade et al. 2023)
Trou de Nutons	Belgium	50.21	4.96	2545.3	UPN-678		Equus	Equus sp.	bone	metatarsal, left distal, impact	OxA-V-3058-14C	12153	31	14088	14035	14059	0.153785	-9.80355	736.259	214.139	Reade et al. 2023	This study	PF at LGM not today	yes	Collagen extracted for Reade et al. 2023 (N isotopes also reported in Reade et al. 2023)
Trou de Nutons	Belgium	50.21	4.96	2535 19	UPN-472		Rangifer	Rangifer tarandus	bone	metatarsus	OxA-V-2748-39C	12300	50	14766	14106	14251	0.164775	-4.19165	717.092	214.762	Reade et al. 2023	This study	PF at LGM not today	yes	Collagen extracted for Reade et al. 2023 (N isotopes also reported in Reade et al. 2023)
Uluir Cave 2	Russia	55.217	59.05	YMG-13 cat# 1373/37	OxA-19685		Megaloceros	Megaloceros giganteus	bone	not given	OxA-19685	10020	40	11686	11358	11516	0.18	4.76779	659.134	198.385	Lister and Stuart, 2019	This study	PF at LGM not today	beyond loess map extent	ORAU collagen left over from 14C dating
Upper Volga River	Russia	57.6261	39.8845		OxA-17375		Mammuthus	Mammuthus primigenius	tooth	not given	OxA-17375	48900	1100	54611	50441	52191	0.16	0.820808	719.399	218.856	Lister & Stuart in prep	This study	PF at LGM not today	no	ORAU collagen left over from 14C dating
Urbar	Germany	50.13	7.72	Sample 20: Ur. 1	UPN-522		Cervus elaphus	Cervus elaphus	bone	not given	OxA-1137	11350	120	13326	13117	13244	0.145081	-0.308376	678.307	200.324	Fiedel et al. 2013	This study	PF at LGM not today	no	Collagen extracted for Reade et al. 2023 (N isotopes also reported in Reade et al. 2023)
Urovsk	Russia	59.47	69.05		OxA-11067		Coelodonta	Coelodonta antiquitatis	bone	vertebra	OxA-11067	24640	150	29058	28759	28904	0.16	-6.50451	699.436	212.854	Stuart & Lister 2012	This study	PF at LGM not today	beyond loess map extent	ORAU collagen left over from 14C dating
Valga	Estonia	57.7815	26.055		OxA-11607		Mammuthus	Mammuthus primigenius	tooth	not given	OxA-11607	28780	160	33598	32980	33211	0.15	-1.919	831.371	252.117	Barnes et al. 2007	This study	PF at LGM not today	no	ORAU collagen left over from 14C dating
Veroli	Italy	41.68	13.42		OxA-10525		Mammuthus	Mammuthus primigenius	tooth	not given	OxA-10525	38950	600	42901	42363	42669	0.15	10.3302	811.424	239.843	Lister & Stuart in prep	This study	No PF past or today	NA	ORAU collagen left over from 14C dating
Victoria Cave	UK	54.08	-2.25	VC 105. Entrance breccia P1-8. A/VC/B/3	UPN-357	A/VC/B/3	Rangifer	Rangifer tarandus	bone	not given	OxA-2457	11590	130	13588	13318	13453	0.306659	13.6123	376.383	114.109	Hedges et al. 1992	This study	PF at LGM not today	no	Collagen extracted for Reade et al. 2023 (N isotopes also reported in Reade et al. 2023)
Victoria Cave	UK	54.08	-2.25	Chamber A P48	UPN-848		Equus	Equus sp.	bone	not given	OxA-15078	12325	50	14792	14140	14312	0.154752	6.81323	762.411	234.925	Lord et al. 2007	This study	PF at LGM not today	no	Pre-extracted collagen from ORAU, N isotopes reported in Reade et al. 2023
Victoria Cave	UK	54.08	-2.25	VC 104. Entrance breccia preservation type. A/VC/B/5	UPN-359	A/VC/B/5	Rangifer	Rangifer tarandus	bone	not given	OxA-15170	11290	55	13236	13116	13182	0.181465	14.2337	628.536	191.484	Lord et al. 2007	This study	PF at LGM not today	no	Collagen extracted for Reade et al. 2023 (N isotopes also reported in Reade et al. 2023)
Victoria Cave	UK	54.08	-2.25	1874. Chamber D 1/178 P35 L3 D1	UPN-355		Equus	Equus sp.	bone	scapula	OxA-19984	11490	50	13422	13314	13370	0.168008	3.09197	708.646	219.003	Reade et al. 2023	This study	PF at LGM not today	no	Pre-extracted collagen from ORAU, N isotopes reported in Reade et al. 2023
Victoria Cave	UK	54.08	-2.25	1870. Entrance breccia P3 D6 L4. Inked 'ox' in W.B. Dawkins handwriting	UPN-354		Equus	Equus sp.	bone	humerus, right	OxA-19983	11090	45	13090	12970	13012	0.152446	4.03359	766.67	235.058	Reade et al. 2023	This study	PF at LGM not today	no	Pre-extracted collagen from ORAU, N isotopes reported in Reade et al. 2023
Vindija Cave	Croatia	46.299	16.07	CROA MG-05 (cat # 663)	OxA-23784		Megaloceros	Megaloceros giganteus	bone	not given	OxA-23784	44200	1900	48966	44798	47370	0.15	4.90112	824.873	256.386	Lister and Stuart, 2019	This study	No PF past or today	NA	Pre-extracted collagen from ORAU, N isotopes reported in Reade et al. 2023
Vindija Cave	Croatia	46.299	16.07	CROA MG-04 (cat # 413)	OxA-23276		Megaloceros	Megaloceros giganteus	bone	not given	OxA-23276	42900	1600	47420	44301	45926	0.15	6.09157	766.159	228.884	Lister and Stuart, 2019	This study	No PF past or today	NA	Pre-extracted collagen from ORAU, N isotopes reported in Reade et al. 2023
Vogelherd Cave	Germany	48.56	10.2		OxA-10195		Mammuthus	Mammuthus primigenius	tooth	not given	OxA-10195	31680	310	36311	35664	36017	0.13	-0.381194	891.109	265.186	Conard 2004	This study	PF at LGM not today	yes	ORAU collagen left over from 14C dating
Vologda Oblast, Kineshma	Russia	57	41		OxA-21047		Mammuthus	Mammuthus primigenius	bone	not given	OxA-21047	27630	140	31696	31360	31533	0.18	3.31355	652.464	203.248	Palkopoulou et al. 2013	This study	PF at LGM not today	yes	ORAU collagen left over from 14C dating
Vologda Oblast, Totma	Russia	59.97	42.78		OxA-21049		Mammuthus	Mammuthus primigenius	bone	not given	OxA-21049	46600	700	49943	48137	49138	0.16	2.14158	763.443	234.168	Palkopoulou et al. 2013	This study	PF at LGM not today	no	ORAU collagen left over from 14C dating
Vologda Oblast, Tula	Russia	54.2	37.62		OxA-21048		Mammuthus	Mammuthus primigenius	bone	not given	OxA-21048	25980	130	30307	30071	30205	0.17	2.93095	697.822	215.005	Palkopoulou et al. 2013	This study	PF at LGM not today	yes	ORAU collagen left over from 14C dating
Vologda Region, Totem District	Russia	59.2181	39.8978		OxA-19365		Mammuthus	Mammuthus primigenius	bone	not given	OxA-19365	40400	500	43985	43083	43583	0.16	1.90995	699.309	219.822	Lister & Stuart in prep	This study	PF at LGM not today	no	ORAU collagen left over from 14C dating
West Siberia (Krasnoyarskaya Kurya)	Russia	50.42	81.67		OxA-20052		Mammuthus	Mammuthus primigenius	tooth	not given	OxA-20052	20980	80	25540	25160	25304	0.16	0.485935	763.426	238.974	Palkopoulou et al. 2013	This study	PF at LGM not today	beyond loess map extent	ORAU collagen left over from 14C dating
West Siberia (Krasnoyarskaya Kurya)	Russia	50.42	81.67		OxA-20053		Mammuthus	Mammuthus primigenius	bone	not given	OxA-20053	20800	80	25193	25000	25092	0.15	0.962766	800.335	251.084	Palkopoulou et al. 2013	This study	PF at LGM not today	beyond loess map extent	ORAU collagen left over from 14C dating
West Siberia (Shestakovo)	Russia	55.64	87.57		OxA-20054		Mammuthus	Mammuthus primigenius	bone	not given	OxA-20054	22940	90	27307	27200	27254	0.16	1.74294	737.837	231.675	Palkopoulou et al. 2013	This study	PF at LGM not today	beyond loess map extent	ORAU collagen left over from 14C dating
Wildscheuer Cave	Germany	50.421	8.137		OxA-10892		Coelodonta	Coelodonta antiquitatis	bone	right humerus (dist + shaft)	OxA-10892	25290	170	29787	29300	29570	0.12	-7.29208	818.628	245.548	Stuart & Lister 2012	This study	PF at LGM not today	yes	Pre-extracted collagen from ORAU, N isotopes reported in Reade et al. 2023
Wrangel Island	Russia	71	179		OxA-11841		Mammuthus	Mammuthus primigenius	bone	not given	OxA-11841	25890	140	30245	30022	30142	0.19	3.6655	643.42	195.373	Barnes et al. 2007	This study	PF throughout past 50,000 years	NA	ORAU collagen left over from 14C dating
Wrangel Island	Russia	71.26	179.43		OxA-19364		Coelodonta	Coelodonta antiquitatis	bone	femur (same as LE-5276)	OxA-19364	37780	310	42324	42072	42193	0.17	-1.72158	672.066	210.692	Lister & Stuart in prep	This study	PF throughout past 50,000 years	NA	ORAU collagen left over from 14C dating
Wrangel Island	Russia	71.23	179.42	B-4, Sr-46	ARP-86		Bos/Bison	Bison priscus	bone	bone	Ua-21319	12990	95	15686	15380	15544	0.2	8.6	647	196	Vartanyan et al. 2008	Arppe et al. 2019	PF throughout past 50,000 years	NA	NA
Wrangel Island	Russia	71.23	179.42	B-3, Sr-45	ARP-85		Bos/Bison	Bison priscus	bone	bone	Ua-21318	19400	210	23729	23110	23386	0.2	10.4	695	215	Vartanyan et al. 2008	Arppe et al. 2019	PF throughout past 50,000 years	NA	NA
Wrangel Island	Russia	71.23	179.42	J-2, 98-02, Sr-11	ARP-6		Mammuthus	M. primigenius	tooth	molar	Ua-17610	14570	140	18015	17521	17800	0.2	-3.3	704	212	Vartanyan et al. 2008	Arppe et al. 2019	PF throughout past 50,000 years	NA	NA
Wrangel Island	Russia	71.23	179.42	J-3, 98-03, Sr-38	ARP-8		Mammuthus	M. primigenius	tooth	molar	Ua-17611	12415	120	14868	14297	14566	0.2	-1.8	634	192	Vartanyan et al. 2008	Arppe et al. 2019	PF throughout past 50,000 years	NA	NA
Wrangel Island	Russia	71.23	179.42	P-10-C, NZV-3, Sr-30	ARP-14	14C date is a mean value (Â± 1 stdev of the mean) based on four determinations; GIN-8654 (6720 Â± 50), GIN-6990 (6750 Â± 30), LU-2736 (6760 Â± 50), LU-3515 (6830 Â± 40).	Mammuthus	M. primigenius	bone	bone	GIN-8654, GIN-6990, LU-2736, LU-3515	6765	50	7662	7580	7619	0.2	-1.5	734	223	Vartanyan et al. 2008	Arppe et al. 2019	PF throughout past 50,000 years	NA	NA
Wrangel Island	Russia	71.23	179.42	P-37, OX-8	ARP-74		Mammuthus	M. primigenius	tooth	molar	Ua-13377	8030	75	9018	8771	8880	0.2	-0.2	627	193	Vartanyan et al. 2008	Arppe et al. 2019	PF throughout past 50,000 years	NA	NA
Wrangel Island	Russia	71.23	179.42	P-6, KRF-2, Sr-9	ARP-51		Mammuthus	M. primigenius	tooth	molar	LU-2792	12980	80	15658	15386	15529	0.2	1.6	609	185	Vartanyan et al. 2008	Arppe et al. 2019	PF throughout past 50,000 years	NA	NA
Wrangel Island	Russia	71.23	179.42	P-7, GUS-9, Sr-25	ARP-52		Mammuthus	M. primigenius	tooth	molar	LU-2799	6260	50	7260	7076	7187	0.2	1.6	612	187	Vartanyan et al. 2008	Arppe et al. 2019	PF throughout past 50,000 years	NA	NA
Wrangel Island	Russia	71.23	179.42	P-42, N64, Sr-41	ARP-5		Mammuthus	M. primigenius	bone	bone	LU-3510	18030	130	22157	21778	21945	0.2	1.7	729	225	Vartanyan et al. 2008	Arppe et al. 2019	PF throughout past 50,000 years	NA	NA
Wrangel Island	Russia	71.23	179.42	P-36, OX-7, Sr-2	ARP-73		Mammuthus	M. primigenius	tooth	molar	Ua-13376	4860	75	5660	5477	5592	0.2	2.3	554	171	Vartanyan et al. 2008	Arppe et al. 2019	PF throughout past 50,000 years	NA	NA
Wrangel Island	Russia	71.23	179.42	P-9, NZV-1, Sr-13	ARP-4		Mammuthus	M. primigenius	tooth	molar	LU-2807	20000	110	24129	23872	24016	0.2	2.5	593	185	Vartanyan et al. 2008	Arppe et al. 2019	PF throughout past 50,000 years	NA	NA
Wrangel Island	Russia	71.23	179.42	P-8, GUS-8, Sr-35	ARP-53		Mammuthus	M. primigenius	tooth	molar	LU-2823	12010	110	14033	13792	13900	0.2	2.6	473	145	Vartanyan et al. 2008	Arppe et al. 2019	PF throughout past 50,000 years	NA	NA
Wrangel Island	Russia	71.23	179.42	J-1, 98-01, Sr-8	ARP-9		Mammuthus	M. primigenius	tooth	molar	Ua-17609	8850	95	10153	9768	9929	0.2	2.6	617	192	Vartanyan et al. 2008	Arppe et al. 2019	PF throughout past 50,000 years	NA	NA
Wrangel Island	Russia	71.23	179.42	J-25, 98-25, Sr-40	ARP-7		Mammuthus	M. primigenius	tooth	molar	Ua-17633	12505	135	15030	14354	14693	0.2	2.7	663	204	Vartanyan et al. 2008	Arppe et al. 2019	PF throughout past 50,000 years	NA	NA
Wrangel Island	Russia	71.23	179.42	J-15, 98-15	ARP-17		Mammuthus	M. primigenius	tooth	molar	Ua-17623	4615	75	5470	5083	5338	0.2	2.7	719	225	Vartanyan et al. 2008	Arppe et al. 2019	PF throughout past 50,000 years	NA	NA
Wrangel Island	Russia	71.23	179.42	P-45, 87, Sr-44	ARP-77		Mammuthus	M. primigenius	bone	bone	LU-3511	37080	1650	42851	40446	41760	0.2	2.8	600	182	Vartanyan et al. 2008	Arppe et al. 2019	PF throughout past 50,000 years	NA	NA
Wrangel Island	Russia	71.23	179.42	J-10, 98-10, Sr-14	ARP-2		Mammuthus	M. primigenius	tooth	molar	Ua-17618	38375	2115	44585	41089	43001	0.2	3	664	193	Vartanyan et al. 2008	Arppe et al. 2019	PF throughout past 50,000 years	NA	NA
Wrangel Island	Russia	71.23	179.42	P-43, 88, Sr-42	ARP-76		Mammuthus	M. primigenius	bone	bone	LU-3512	20660	190	25153	24630	24875	0.2	3.1	524	159	Vartanyan et al. 2008	Arppe et al. 2019	PF throughout past 50,000 years	NA	NA
Wrangel Island	Russia	71.23	179.42	P-34, OX-5, Sr-27	ARP-72		Mammuthus	M. primigenius	tooth	molar	Ua-13374	6410	90	7423	7262	7328	0.2	3.3	538	166	Vartanyan et al. 2008	Arppe et al. 2019	PF throughout past 50,000 years	NA	NA
Wrangel Island	Russia	71.23	179.42	P-13b, 17-M	ARP-15		Mammuthus	M. primigenius	tooth	tusk	GIN-6988	5610	40	6437	6314	6375	0.2	3.5	710	227	Vartanyan et al. 2008	Arppe et al. 2019	PF throughout past 50,000 years	NA	NA
Wrangel Island	Russia	71.23	179.42	P-27, OX-17, Sr-4	ARP-66		Mammuthus	M. primigenius	tooth	molar	Ua-13367	6405	65	7421	7269	7328	0.2	3.7	648	197	Vartanyan et al. 2008	Arppe et al. 2019	PF throughout past 50,000 years	NA	NA
Wrangel Island	Russia	71.23	179.42	P-32, OX-3, Sr-6	ARP-70		Mammuthus	M. primigenius	tooth	molar	Ua-13372	7510	80	8387	8207	8309	0.2	3.8	558	173	Vartanyan et al. 2008	Arppe et al. 2019	PF throughout past 50,000 years	NA	NA
Wrangel Island	Russia	71.23	179.42	P-21, OX-11, Sr-29	ARP-60		Mammuthus	M. primigenius	tooth	molar	Ua-13361	6560	75	7566	7422	7466	0.2	4	677	209	Vartanyan et al. 2008	Arppe et al. 2019	PF throughout past 50,000 years	NA	NA
Wrangel Island	Russia	71.23	179.42	P-33, OX-4	ARP-71		Mammuthus	M. primigenius	tooth	molar	Ua-13373	4675	75	5546	5315	5409	0.2	4.1	606	187	Vartanyan et al. 2008	Arppe et al. 2019	PF throughout past 50,000 years	NA	NA
Wrangel Island	Russia	71.23	179.42	P-29, OX-19	ARP-20		Mammuthus	M. primigenius	tooth	molar	Ua-13369	4085	65	4801	4447	4605	0.1	4.1	790	245	Vartanyan et al. 2008	Arppe et al. 2019	PF throughout past 50,000 years	NA	NA
Wrangel Island	Russia	71.23	179.42	P-17, Sr-17	ARP-56		Mammuthus	M. primigenius	tooth	molar	Ua-13357	4985	65	5857	5603	5719	0.2	4.5	685	211	Vartanyan et al. 2008	Arppe et al. 2019	PF throughout past 50,000 years	NA	NA
Wrangel Island	Russia	71.23	179.42	P-30, OX-1	ARP-68		Mammuthus	M. primigenius	tooth	molar	Ua-13370	7910	80	8976	8601	8760	0.2	4.8	607	187	Vartanyan et al. 2008	Arppe et al. 2019	PF throughout past 50,000 years	NA	NA
Wrangel Island	Russia	71.23	179.42	P-38, PIK-7	ARP-75		Mammuthus	M. primigenius	tooth	molar	Ua-13378	4475	60	5284	4985	5129	0.2	5	575	176	Vartanyan et al. 2008	Arppe et al. 2019	PF throughout past 50,000 years	NA	NA
Wrangel Island	Russia	71.23	179.42	P-20, OX-10, Sr-28	ARP-59		Mammuthus	M. primigenius	tooth	molar	Ua-13360	6530	70	7555	7337	7440	0.2	5.1	638	196	Vartanyan et al. 2008	Arppe et al. 2019	PF throughout past 50,000 years	NA	NA
Wrangel Island	Russia	71.23	179.42	P-26, OX-16, Sr-1	ARP-65		Mammuthus	M. primigenius	tooth	molar	Ua-13366	3685	60	4143	3925	4024	0.2	5.2	575	176	Vartanyan et al. 2008	Arppe et al. 2019	PF throughout past 50,000 years	NA	NA
Wrangel Island	Russia	71.23	179.42	P-18	ARP-57		Mammuthus	M. primigenius	tooth	molar	Ua-13358	4860	70	5660	5478	5592	0.2	5.2	618	190	Vartanyan et al. 2008	Arppe et al. 2019	PF throughout past 50,000 years	NA	NA
Wrangel Island	Russia	71.23	179.42	J-16, 98-16	ARP-10		Mammuthus	M. primigenius	tooth	molar	Ua-17624	8135	80	9263	8994	9089	0.2	5.8	730	220	Vartanyan et al. 2008	Arppe et al. 2019	PF throughout past 50,000 years	NA	NA
Wrangel Island	Russia	71.23	179.42	24-M	ARP-80		Mammuthus	M. primigenius	tooth	tusk	LU-3739	6070	70	7151	6797	6931	0.2	5.8	636	193	Vartanyan et al. 2008	Arppe et al. 2019	PF throughout past 50,000 years	NA	NA
Wrangel Island	Russia	71.23	179.42	P-12, 6-M	ARP-18		Mammuthus	M. primigenius	tooth	tusk	GIN-6989	4370	40	4970	4865	4934	0.2	5.9	725	212	Vartanyan et al. 2008	Arppe et al. 2019	PF throughout past 50,000 years	NA	NA
Wrangel Island	Russia	71.23	179.42	P-23, OX-13, Sr-36	ARP-62		Mammuthus	M. primigenius	tooth	molar	Ua-13363	8640	80	9698	9533	9633	0.2	6	651	201	Vartanyan et al. 2008	Arppe et al. 2019	PF throughout past 50,000 years	NA	NA
Wrangel Island	Russia	71.23	179.42	J-4, 98-04	ARP-11		Mammuthus	M. primigenius	tooth	molar	Ua-17612	7835	85	8850	8482	8648	0.2	6.2	635	193	Vartanyan et al. 2008	Arppe et al. 2019	PF throughout past 50,000 years	NA	NA
Wrangel Island	Russia	71.23	179.42	P-44, SR-2, Sr-43	ARP-3		Mammuthus	M. primigenius	bone	bone	GIN-8257	22400	200	26971	26453	26729	0.2	6.3	748	223	Vartanyan et al. 2008	Arppe et al. 2019	PF throughout past 50,000 years	NA	NA
Wrangel Island	Russia	71.23	179.42	J-20, 98-20, Sr-18	ARP-16		Mammuthus	M. primigenius	tooth	molar	Ua-17628	5185	80	6170	5759	5954	0.2	6.4	712	215	Vartanyan et al. 2008	Arppe et al. 2019	PF throughout past 50,000 years	NA	NA
Wrangel Island	Russia	71.23	179.42	P-31, OX-2, Sr-24	ARP-69		Mammuthus	M. primigenius	tooth	molar	Ua-13371	6090	75	7155	6801	6960	0.2	6.4	571	177	Vartanyan et al. 2008	Arppe et al. 2019	PF throughout past 50,000 years	NA	NA
Wrangel Island	Russia	71.23	179.42	P-19, OX-9, Sr-19	ARP-58		Mammuthus	M. primigenius	tooth	molar	Ua-13359	5285	65	6181	5948	6076	0.2	6.5	680	209	Vartanyan et al. 2008	Arppe et al. 2019	PF throughout past 50,000 years	NA	NA
Wrangel Island	Russia	71.23	179.42	P-14, 5-M	ARP-54		Mammuthus	M. primigenius	tooth	tusk	GIN-6997	6690	60	7614	7503	7556	0.2	6.5	738	228	Vartanyan et al. 2008	Arppe et al. 2019	PF throughout past 50,000 years	NA	NA
Wrangel Island	Russia	71.23	179.42	P-5, PIK-1, Sr-34	ARP-50		Mammuthus	M. primigenius	tooth	molar	LU-2809	7250	60	8169	7985	8078	0.2	6.8	634	191	Vartanyan et al. 2008	Arppe et al. 2019	PF throughout past 50,000 years	NA	NA
Wrangel Island	Russia	71.23	179.42	J-14, 98-14, Sr-32	ARP-13		Mammuthus	M. primigenius	tooth	molar	Ua-17622	7060	80	7965	7794	7880	0.2	6.8	681	217	Vartanyan et al. 2008	Arppe et al. 2019	PF throughout past 50,000 years	NA	NA
Wrangel Island	Russia	71.23	179.42	P-22, OX-12	ARP-61		Mammuthus	M. primigenius	tooth	molar	Ua-13362	4260	75	4959	4645	4817	0.2	6.9	702	219	Vartanyan et al. 2008	Arppe et al. 2019	PF throughout past 50,000 years	NA	NA
Wrangel Island	Russia	71.23	179.42	P-15b, 1-M	ARP-12		Mammuthus	M. primigenius	tooth	tusk	GIN-6995	7710	40	8538	8431	8488	0.2	7.1	723	213	Vartanyan et al. 2008	Arppe et al. 2019	PF throughout past 50,000 years	NA	NA
Wrangel Island	Russia	71.23	179.42	P-46, 9-M	ARP-78		Mammuthus	M. primigenius	tooth	tusk	LU-2756	4400	40	5040	4875	4971	0.2	7.7	586	181	Vartanyan et al. 2008	Arppe et al. 2019	PF throughout past 50,000 years	NA	NA
Wrangel Island	Russia	71.23	179.42	P-16, Sr-23	ARP-55		Mammuthus	M. primigenius	tooth	molar	Ua-13356	5875	70	6788	6569	6694	0.2	7.7	649	199	Vartanyan et al. 2008	Arppe et al. 2019	PF throughout past 50,000 years	NA	NA
Wrangel Island	Russia	71.23	179.42	P-28, OX-18, Sr-16	ARP-67		Mammuthus	M. primigenius	tooth	molar	Ua-13368	4730	65	5577	5329	5463	0.2	7.8	630	193	Vartanyan et al. 2008	Arppe et al. 2019	PF throughout past 50,000 years	NA	NA
Wrangel Island	Russia	71.23	179.42	P-35, OX-6	ARP-19		Mammuthus	M. primigenius	tooth	molar	Ua-13375	4210	70	4849	4623	4725	0.1	8.4	794	243	Vartanyan et al. 2008	Arppe et al. 2019	PF throughout past 50,000 years	NA	NA
Wrangel Island	Russia	71.23	179.42	P-24, OX-14	ARP-63		Mammuthus	M. primigenius	tooth	molar	Ua-13364	4335	60	4972	4842	4924	0.2	9.1	718	223	Vartanyan et al. 2008	Arppe et al. 2019	PF throughout past 50,000 years	NA	NA
Wrangel Island	Russia	71.23	179.42	P-11b, 21-M	ARP-21		Mammuthus	M. primigenius	tooth	tusk	LU-2741	3730	40	4149	3989	4078	0.2	10.8	596	186	Vartanyan et al. 2008	Arppe et al. 2019	PF throughout past 50,000 years	NA	NA
Wrangel Island	Russia	71.23	179.42	P-56, 8-M	ARP-79		Mammuthus	M. primigenius	tooth	tusk	GIN-6985	3920	40	4418	4293	4352	0.2	11.4	661	203	Vartanyan et al. 2008	Arppe et al. 2019	PF throughout past 50,000 years	NA	NA
Wrangel Island	Russia	71.23	179.42	OB-2, Sr-48	ARP-82		Ovibos	Ovibos moschatus	bone	bone	Ua-21321	17670	215	21746	21062	21417	0.2	5.3	638	195	Vartanyan et al. 2008	Arppe et al. 2019	PF throughout past 50,000 years	NA	NA
Y-hohle	Switzerland	47.48	7.5	59/20/1	UPN-231		Rangifer	Rangifer tarandus	bone	not given	OxA-V-2748-22C	19300	90	23660	23047	23227	0.14	-12.6	781	245	Reade et al. 2020a	Reade et al. 2020a	PF at LGM not today	yes	NA
Yakutia, Indigirka Lowland	Russia	70.55	149.69		OxA-21009		Mammuthus	Mammuthus primigenius	tooth	not given	OxA-21009	28420	160	32919	32197	32558	0.21	-4.9525	578.079	177.702	Palkopoulou et al. 2013	This study	PF throughout past 50,000 years	NA	ORAU collagen left over from 14C dating
Yakutia, Indigirka Lowland	Russia	70.53	144.58		OxA-21008		Mammuthus	Mammuthus primigenius	tooth	not given	OxA-21008	49100	1200	54746	50916	52396	0.18	1.38615	676.172	209.019	Palkopoulou et al. 2013	This study	PF throughout past 50,000 years	NA	ORAU collagen left over from 14C dating
Yarte 6, Urals	Russia	65.93	66.55		OxA-10915		Mammuthus	Mammuthus primigenius	bone	not given	OxA-10915	38000	500	42469	42074	42272	0.22	3.04961	549.227	169.051	Lister & Stuart in prep	This study	PF throughout past 50,000 years	NA	ORAU collagen left over from 14C dating

## Sheet: Czech context data
Site	Country	Latitude	Longitude	Sample.Info.Excavation.ID.Museum.Code	Sample code	Other sample codes associated with specimen	Faunal Category	Species	Material_type	Element	14C lab code	14C date	14C uncertainty	cal BP from (1 sigma)	cal BP to (1 sigma)	Median Date cal BP (2 sigma)	AgeCat	%S	d34S	C:S	N:S	14C reference	Sulfur isotope reference
Kůlna	Czech Republic	49.41	16.74	Layer 4 87/61	UPN-158		Alces	Alces alces	bone	metatarsus dex	NA	NA	NA	NA	NA		c. 14.1 - 12.7 ka	0.13	-6.4	499	155	NA	Reade et al., 2021
Kůlna	Czech Republic	49.41	16.74	Layer 4 K2011003	UPN-162		Alces	Alces alces	bone	metatarsus	OxA-25284	11820	50	13754	13606	13679	c. 14.1 - 12.7 ka	0.17	-4.7	426	130	Nerudová & Neruda, 2014	Reade et al., 2021
Kůlna	Czech Republic	49.41	16.74	Layer 4 K2011004	UPN-163		Alces	Alces alces	bone	metatarsus	OxA-25285	11770	55	13746	13515	13636	c. 14.1 - 12.7 ka	0.13	-1.8	315	100	Nerudová & Neruda, 2014	Reade et al., 2021
Kůlna	Czech Republic	49.41	16.74	Layer 4 sektor D, I, II / A+ pod skalou, found 1962	UPN-068		Alces	Alces alces	bone	mandibula with molars	NA	NA	NA	NA	NA		c. 14.1 - 12.7 ka	0.18	-0.3	590	177	NA	Reade et al., 2021
Kůlna	Czech Republic	49.41	16.74	Layer 4 sektor D, I, II / F, G, found 1962	UPN-049		Alces	Alces alces	bone	metatarsus	NA	NA	NA	NA	NA		c. 14.1 - 12.7 ka	0.23	0.6	500	151	NA	Reade et al., 2021
Kůlna	Czech Republic	49.41	16.74	Layer 4 sektor D, II/ E-F, found 1962	UPN-067		Alces	Alces alces	tooth	M3, lower	NA	NA	NA	NA	NA		c. 14.1 - 12.7 ka	0.21	0	546	166	NA	Reade et al., 2021
Kůlna	Czech Republic	49.41	16.74	Layer 4 sektor D, III/ K, L, M, N, O, depth 165-185 cm	UPN-059		Alces	Alces alces	tooth	molar, upper	NA	NA	NA	NA	NA		c. 14.1 - 12.7 ka	0.2	-3.1	557	168	NA	Reade et al., 2021
Kůlna	Czech Republic	49.41	16.74	Layer 4 sektor A, 9e, found 1961	UPN-079		Bos	Bos primigenius	bone	humerus, distal fragment	NA	NA	NA	NA	NA		c. 14.1 - 12.7 ka	0.16	-4.6	617	188	NA	Reade et al., 2021
Kůlna	Czech Republic	49.41	16.74	Layer 4 sektor A, 9f, found 1961	UPN-081		Bos	Bos primigenius	bone	metacarpus	NA	NA	NA	NA	NA		c. 14.1 - 12.7 ka	0.19	-4	560	172	NA	Reade et al., 2021
Kůlna	Czech Republic	49.41	16.74	Layer 4 sektor D, 1/M, N, found 1962	UPN-046		Bos	Bos primigenius	bone	phalange	NA	NA	NA	NA	NA		c. 14.1 - 12.7 ka	0.18	0.8	582	181	NA	Reade et al., 2021
Kůlna	Czech Republic	49.41	16.74	Layer 4 sektor D, II, III, IV/ P, R, P, S, found 1962	UPN-074		Bos	Bos primigenius	bone	metacarpal, distal	NA	NA	NA	NA	NA		c. 14.1 - 12.7 ka	0.16	-1.8	696	218	NA	Reade et al., 2021
Kůlna	Czech Republic	49.41	16.74	Layer 4 sektor D, II, III, IV/ P, R, P, S, found 1962	UPN-071		Bos	Bos primigenius	bone	phalange 2 fragment	NA	NA	NA	NA	NA		c. 14.1 - 12.7 ka	0.15	-1.8	713	226	NA	Reade et al., 2021
Kůlna	Czech Republic	49.41	16.74	Layer 4 sektor D, II, III, IV/ P, R, P, S, found 1962	UPN-073		Bos	Bos primigenius	bone	metatarsus, proximal, long fragment	NA	NA	NA	NA	NA		c. 14.1 - 12.7 ka	0.17	0.3	652	202	NA	Reade et al., 2021
Kůlna	Czech Republic	49.41	16.74	Layer 4 sektor D, II, III, IV/ P, R, P, S, found 1962	UPN-072		Bos	Bos primigenius	bone	metatarsus, proximal, short fragment	NA	NA	NA	NA	NA		c. 14.1 - 12.7 ka	0.16	-8.2	742	234	NA	Reade et al., 2021
Kůlna	Czech Republic	49.41	16.74	Layer 5 sector A, 4c, found 1961	UPN-106		Bos	Bos primigenius	bone	carpal	OxA-V-3079-13C	11133	33	13106	13003	13077	c. 14.1 - 12.7 ka	0.15	-9.3	723	221	Reade et al., 2021	Reade et al., 2021
Kůlna	Czech Republic	49.41	16.74	Layer 4 K-12758/75	UPN-159		Cervus elaphus	Cervus elaphus	bone	metatarsus dex	NA	NA	NA	NA	NA		c. 14.1 - 12.7 ka	0.13	-7.8	596	178	NA	Reade et al., 2021
Kůlna	Czech Republic	49.41	16.74	Layer 4 sektor A, 6f, found 1961	UPN-089		Cervus elaphus	Cervus elaphus	tooth	M2, upper	NA	NA	NA	NA	NA		c. 14.1 - 12.7 ka	0.13	-6.1	845	261	NA	Reade et al., 2021
Kůlna	Czech Republic	49.41	16.74	Layer 4 sektor A, 8e, found 1961	UPN-088		Cervus elaphus	Cervus elaphus	bone	metacarpal	NA	NA	NA	NA	NA		c. 14.1 - 12.7 ka	0.14	-1.1	729	220	NA	Reade et al., 2021
Kůlna	Czech Republic	49.41	16.74	Layer 4 sektor D, 3-4/M, depth 155/165 found 1962	UPN-054		Cervus elaphus	Cervus elaphus	bone	metacarpus	NA	NA	NA	NA	NA		c. 14.1 - 12.7 ka	0.14	-1.2	794	247	NA	Reade et al., 2021
Kůlna	Czech Republic	49.41	16.74	Layer 4 sektor D, I, 1 / P-R, depth 180-190, found 1962	UPN-075		Cervus elaphus	Cervus elaphus	bone	metacarpal, distal	NA	NA	NA	NA	NA		c. 14.1 - 12.7 ka	0.12	-4.6	885	273	NA	Reade et al., 2021
Kůlna	Czech Republic	49.41	16.74	Layer 4 sektor D, II/L, depth 165-185 cm, found 1962	UPN-065		Cervus elaphus	Cervus elaphus	bone	metatarsus	OxA-V-3071-8C/OxA-V-3071-9C	11805	22	13747	13601	13676	c. 14.1 - 12.7 ka	0.17	-9.5	727	229	Reade et al., 2021	Reade et al., 2021
Kůlna	Czech Republic	49.41	16.74	Layer 4 Sector A	UPN-164		Equus	Equus sp.	bone	tibia	OxA-25286	11070	50	13080	12929	12995	c. 14.1 - 12.7 ka	0.15	-6.8	655	199	Nerudová & Neruda, 2014	Reade et al., 2021
Kůlna	Czech Republic	49.41	16.74	Layer 4 sektor A, 9e, found 1961	UPN-078		Equus	Equus sp.	bone	metacarpus, distal	NA	NA	NA	NA	NA		c. 14.1 - 12.7 ka	0.12	-2.4	873	273	NA	Reade et al., 2021
Kůlna	Czech Republic	49.41	16.74	Layer 4 sektor A, 9f, found 1961	UPN-080		Equus	Equus sp.	bone	tibia fragment	NA	NA	NA	NA	NA		c. 14.1 - 12.7 ka	0.16	-3.8	649	198	NA	Reade et al., 2021
Kůlna	Czech Republic	49.41	16.74	Layer 4 sektor D, I, II / F, G, found 1962	UPN-050		Equus	Equus sp.	bone	radius, distal	NA	NA	NA	NA	NA		c. 14.1 - 12.7 ka	0.14	-10.1	786	236	NA	Reade et al., 2021
Kůlna	Czech Republic	49.41	16.74	Layer 4 sektor D, I, II / S, depth 160-170 cm	UPN-063		Equus	Equus sp.	bone	metapodial, distal	NA	NA	NA	NA	NA		c. 14.1 - 12.7 ka	0.15	-10.6	806	252	NA	Reade et al., 2021
Kůlna	Czech Republic	49.41	16.74	Layer 4 sektor D, II, III, IV/ P, R, P, S, found 1962	UPN-069		Equus	Equus sp.	bone	tibia	NA	NA	NA	NA	NA		c. 14.1 - 12.7 ka	0.15	-5.7	796	249	NA	Reade et al., 2021
Kůlna	Czech Republic	49.41	16.74	Layer 4 sektor D, III/ K, L, M, N, O, depth 165-185 cm	UPN-057		Equus	Equus sp.	bone	metapodial, distal	NA	NA	NA	NA	NA		c. 14.1 - 12.7 ka	0.15	-6.3	741	232	NA	Reade et al., 2021
Kůlna	Czech Republic	49.41	16.74	Layer 4 sektor D, III/ K, L, M, N, O, depth 165-185 cm	UPN-056		Equus	Equus sp.	bone	metacarpal	NA	NA	NA	NA	NA		c. 14.1 - 12.7 ka	0.15	-6	775	244	NA	Reade et al., 2021
Kůlna	Czech Republic	49.41	16.74	Layer 5 sector D, III, IV / S, depth 180-190, found 1962	UPN-128		Equus	Equus sp.	bone	metacarpus, proximal	OxA-V-2777-56C	11510	50	13435	13330	13385	c. 14.1 - 12.7 ka	0.13	-5.3	673	202	Reade et al., 2021	Reade et al., 2021
Kůlna	Czech Republic	49.41	16.74	Layer 4 sektor D, III, IV / S, depth 160-170 cm, found 1962	UPN-053		Large herbivore	Rangifer tarandus	bone	metacarpal	NA	NA	NA	NA	NA		c. 14.1 - 12.7 ka	0.17	-2.6	596	186	NA	Reade et al., 2021
Kůlna	Czech Republic	49.41	16.74	Layer 4 sektor D, III/ K, L, M, N, O, depth 165-185cm	UPN-060		Large herbivore	Rangifer tarandus	bone	metatarsus	NA	NA	NA	NA	NA		c. 14.1 - 12.7 ka	0.17	-5.5	672	209	NA	Reade et al., 2021
Kůlna	Czech Republic	49.41	16.74	Layer 5 K2011006	UPN-165		Large herbivore	Large herbivore	bone	not given	OxA-25287	11010	50	13053	12841	12938	c. 14.1 - 12.7 ka	0.2	-2.1	500	156	Nerudová & Neruda, 2014	Reade et al., 2021
Kůlna	Czech Republic	49.41	16.74	Layer 6 sector G1, 37, 38/ I, J, depth 0-50, OK 094961, found 1966	UPN-152		Bos	Bos primigenius	bone	phalange 1	NA	NA	NA	NA	NA		c. 15.5 - 14.5 ka	0.17	-9.1	700	224	NA	Reade et al., 2021
Kůlna	Czech Republic	49.41	16.74	Layer 6 sector G1, 38/L-O, depth 155/175 cm, found 1968	UPN-149		Bos	Bos primigenius	bone	phalange	NA	NA	NA	NA	NA		c. 15.5 - 14.5 ka	0.18	-5	567	180	NA	Reade et al., 2021
Kůlna	Czech Republic	49.41	16.74	Layer 6 sektor A, 6f, found 1961	UPN-093		Bos	Bos primigenius	bone	phalange	NA	NA	NA	NA	NA		c. 15.5 - 14.5 ka	0.08	-2.1	810	249	NA	Reade et al., 2021
Kůlna	Czech Republic	49.41	16.74	Layer 6 sektor A, 6f, found 1961	UPN-094		Bos	Bos primigenius	bone	metacarpus, distal	NA	NA	NA	NA	NA		c. 15.5 - 14.5 ka	0.13	-8.2	847	266	NA	Reade et al., 2021
Kůlna	Czech Republic	49.41	16.74	Layer 6 sector D, III/H-K, depth 170-190 cm, found 1966	UPN-147		Cervus elaphus	Cervus elaphus	tooth	M3, lower	NA	NA	NA	NA	NA		c. 15.5 - 14.5 ka	0.17	-2.4	672	208	NA	Reade et al., 2021
Kůlna	Czech Republic	49.41	16.74	Layer 6 sektor A, 7e, found 1961	UPN-096		Cervus elaphus	Cervus elaphus	bone	metatarsus, distal	NA	NA	NA	NA	NA		c. 15.5 - 14.5 ka	0.14	-1.9	688	209	NA	Reade et al., 2021
Kůlna	Czech Republic	49.41	16.74	Layer 5 K2011007	UPN-166		Equus	Equus	bone	not given	OxA-25288	12600	60	15132	14911	15004	c. 15.5 - 14.5 ka	0.21	-4.6	453	142	Nerudová & Neruda, 2014	Reade et al., 2021
Kůlna	Czech Republic	49.41	16.74	Layer 5 sector A, 6g, found 1961	UPN-120		Equus	Equus sp.	bone	phalange 2	OxA-V-2777-55C	12810	60	15387	15170	15291	c. 15.5 - 14.5 ka	0.14	-11.8	827	255	Reade et al., 2021	Reade et al., 2021
Kůlna	Czech Republic	49.41	16.74	Layer 6 sector D, II, III, IV / R, S, depth 200-220 cm, found 1962	UPN-144		Equus	Equus sp.	tooth	P3-M2?, lower	NA	NA	NA	NA	NA		c. 15.5 - 14.5 ka	0.14	-10.2	762	239	NA	Reade et al., 2021
Kůlna	Czech Republic	49.41	16.74	Layer 6 sector D, III/H-K, depth 170-190 cm, found 1966	UPN-146		Equus	Equus sp.	tooth	P3-M2?, upper	NA	NA	NA	NA	NA		c. 15.5 - 14.5 ka	0.15	-14.4	730	228	NA	Reade et al., 2021
Kůlna	Czech Republic	49.41	16.74	Layer 6 sector G1	UPN-170		Equus	Equus sp.	bone	tibia	OxA-25290	12555	60	15077	14620	14907	c. 15.5 - 14.5 ka	0.18	-3	494	154	Nerudová & Neruda, 2014	Reade et al., 2021
Kůlna	Czech Republic	49.41	16.74	Layer 6 sector G1	UPN-169		Equus	Equus sp.	bone	pelvis	OxA-25289	12575	60	15112	14847	14954	c. 15.5 - 14.5 ka	0.18	-5.7	574	181	Nerudová & Neruda, 2014	Reade et al., 2021
Kůlna	Czech Republic	49.41	16.74	Layer 6 sector G1, 37, 38/M, depth 95-145 cm found in 1966, OK 094918	UPN-156		Equus	Equus sp.	bone	carpal	NA	NA	NA	NA	NA		c. 15.5 - 14.5 ka	0.21	-3.1	511	164	NA	Reade et al., 2021
Kůlna	Czech Republic	49.41	16.74	Layer 6 sector G1, 38/L, depth 95-145 cm, found 1966, OK-094867	UPN-154		Equus	Equus sp.	bone	phalange	OxA-V-3079-16C	12673	37	15176	15035	15109	c. 15.5 - 14.5 ka	0.16	-17.7	717	228	Reade et al., 2021	Reade et al., 2021
Kůlna	Czech Republic	49.41	16.74	Layer 6 sector G1, 38/L, depth 95-145 cm, found 1966, OK-094868	UPN-155		Equus	Equus sp.	tooth	P3-M2?, upper	NA	NA	NA	NA	NA		c. 15.5 - 14.5 ka	0.15	-10.5	737	233	NA	Reade et al., 2021
Kůlna	Czech Republic	49.41	16.74	Layer 6 sector G1, 38/L, depth 95-145 cm, OK 094873, found 1966	UPN-153		Equus	Equus sp.	bone	scapula	OxA-V-3079-15C	12665	36	15163	15025	15098	c. 15.5 - 14.5 ka	0.17	-13.9	708	225	Reade et al., 2021	Reade et al., 2021
Kůlna	Czech Republic	49.41	16.74	Layer 6 sektor A, 6a, found 1961	UPN-102		Equus	Equus sp.	bone	phalange	OxA-V-2775-57C	12910	60	15540	15322	15434	c. 15.5 - 14.5 ka	0.14	-19.3	777	237	Reade et al., 2021	Reade et al., 2021
Kůlna	Czech Republic	49.41	16.74	Layer 6 sektor A, 6a, found 1961	UPN-101		Equus	Equus sp.	bone	tibia	NA	NA	NA	NA	NA		c. 15.5 - 14.5 ka	0.15	-10.8	728	226	NA	Reade et al., 2021
Kůlna	Czech Republic	49.41	16.74	Layer 6 sektor A, pruh 3-4, found 1961	UPN-103		Equus	Equus sp.	bone	pelvis	OxA-V-3079-12C	12898	38	15504	15322	15417	c. 15.5 - 14.5 ka	0.14	-10.3	732	222	Reade et al., 2021	Reade et al., 2021
Kůlna	Czech Republic	49.41	16.74	Layer 5 sector D, I, IV / S, depth 190-200 cm, found 1962	UPN-135		Rangifer	Rangifer tarandus	bone	phalange 1	OxA-V-3079-14C	12909	38	15518	15336	15430	c. 15.5 - 14.5 ka	0.17	-7.9	635	189	Reade et al., 2021	Reade et al., 2021
Kůlna	Czech Republic	49.41	16.74	Layer 6	UPN-160		Rangifer	Rangifer tarandus	bone	metatarsus dex	NA	NA	NA	NA	NA		c. 15.5 - 14.5 ka	0.2	-9	631	200	NA	Reade et al., 2021
Kůlna	Czech Republic	49.41	16.74	Layer 6 sector D, 11/I, J, depth 90-120 cm, found 1962	UPN-145		Rangifer	Rangifer tarandus	bone	phalange 2	NA	NA	NA	NA	NA		c. 15.5 - 14.5 ka	0.2	0.4	554	171	NA	Reade et al., 2021
Kůlna	Czech Republic	49.41	16.74	Layer 6 sector D, 13-16g, depth 175-200 cm, found 1963	UPN-143		Rangifer	Rangifer tarandus	bone	calcaneus	NA	NA	NA	NA	NA		c. 15.5 - 14.5 ka	0.16	-8.9	671	204	NA	Reade et al., 2021
Kůlna	Czech Republic	49.41	16.74	Layer 6 sector D, 13-16g, depth 175-200 cm, found 1963	UPN-142		Rangifer	Rangifer tarandus	bone	scapula	NA	NA	NA	NA	NA		c. 15.5 - 14.5 ka	0.14	1.3	739	224	NA	Reade et al., 2021
Kůlna	Czech Republic	49.41	16.74	Layer 6 sector D, I, II / B-D, depth 260-270 cm, found 1962	UPN-138		Rangifer	Rangifer tarandus	bone	phalange 2	NA	NA	NA	NA	NA		c. 15.5 - 14.5 ka	0.15	-4.1	717	217	NA	Reade et al., 2021
Kůlna	Czech Republic	49.41	16.74	Layer 6 sector D, I-IV / P-S, depth 210-220, found in 1962	UPN-141		Rangifer	Rangifer tarandus	bone	metatarsus	NA	NA	NA	NA	NA		c. 15.5 - 14.5 ka	0.15	-12	742	224	NA	Reade et al., 2021
Kůlna	Czech Republic	49.41	16.74	Layer 6 sector G1	UPN-171		Rangifer	Rangifer tarandus	bone	humerus	OxA-V-2793-53C	12650	50	15154	14995	15078	c. 15.5 - 14.5 ka	0.2	-5.4	476	150	Reade et al., 2021	Reade et al., 2021
Kůlna	Czech Republic	49.41	16.74	Layer 6 sector G1, 38/L-O, depth 155/175 cm, found 1968	UPN-151		Rangifer	Rangifer tarandus	bone	radius/ ulna	NA	NA	NA	NA	NA		c. 15.5 - 14.5 ka	0.2	-8.5	566	175	NA	Reade et al., 2021
Kůlna	Czech Republic	49.41	16.74	Layer 6 sector G1, found 1968, 42/M-O, depth 130-150 cm, OK 98794	UPN-148		Rangifer	Rangifer tarandus	bone	humerus fragment	NA	NA	NA	NA	NA		c. 15.5 - 14.5 ka	0.19	0.8	592	183	NA	Reade et al., 2021
Kůlna	Czech Republic	49.41	16.74	Layer 6 sektor A, 7e, found 1961	UPN-095		Rangifer	Rangifer tarandus	bone	calcaneus	NA	NA	NA	NA	NA		c. 15.5 - 14.5 ka	0.17	-10.5	648	198	NA	Reade et al., 2021
Kůlna	Czech Republic	49.41	16.74	Layer 6 sektor A, 8ab, found 1961	UPN-097		Rangifer	Rangifer tarandus	bone	metatarsus	NA	NA	NA	NA	NA		c. 15.5 - 14.5 ka	0.15	-5.9	670	204	NA	Reade et al., 2021
Kůlna	Czech Republic	49.41	16.74	Layer 6 sektor A, 8ab, found 1961	UPN-098		Rangifer	Rangifer tarandus	bone	tibia	NA	NA	NA	NA	NA		c. 15.5 - 14.5 ka	0.16	-8.4	672	205	NA	Reade et al., 2021
Kůlna	Czech Republic	49.41	16.74	Layer 6 sektor A, pruh 1, found 1961	UPN-104		Rangifer	Rangifer tarandus	bone	metatarsal	NA	NA	NA	NA	NA		c. 15.5 - 14.5 ka	0.14	-9.4	618	185	NA	Reade et al., 2021
Brno-Styrice III	Czech Republic	49.18	16.59		UPN-045		Equus	Equus sp.	bone	tibia	NA	NA	NA	NA	NA		c. 18 ka	0.27	-7.85241	420.423	129.646	NA	This study
Mikulcice	Czech Republic	48.8	17.08		MikF33		Bos	Bos taurus	bone	bone	NA	NA	NA				c. 1ka	0.2	-4.2	471	145	NA	Kaupova 2016
Mikulcice	Czech Republic	48.8	17.08		MikF29		Equus	Equus caballus	bone	bone	NA	NA	NA	NA	NA		c. 1ka	0.2	1.9	579	182	NA	Kaupova 2016
Mikulcice	Czech Republic	48.8	17.08		MikF24		Ovis	Ovis aries	bone	bone	NA	NA	NA				c. 1ka	0.2	6.9	550	171	NA	Kaupova 2016
Mikulcice	Czech Republic	48.8	17.08		MikF28		Ovis	Ovis aries	bone	bone	NA	NA	NA				c. 1ka	0.2	-3.4	556	173	NA	Kaupova 2016
Mikulcice	Czech Republic	48.8	17.08		MikF04		Ovis	Ovis aries	bone	bone	NA	NA	NA				c. 1ka	0.2	-0.9	546	170	NA	Kaupova 2016
Mikulcice	Czech Republic	48.8	17.08		MikF23		Ovis	Ovis aries	bone	bone	NA	NA	NA				c. 1ka	0.2	4.4	562	178	NA	Kaupova 2016
Pohansko	Czech Republic	48.72	16.89		POHF04		Ovis	Ovis aries	bone	bone	NA	NA	NA				c. 1ka	0.2	0.3	561	176	NA	Kaupova 2016
Mikulcice	Czech Republic	48.8	17.08		MIKF06		Sus	Sus domesticus	bone	bone	NA	NA	NA				c. 1ka	0.2	2.1	528	164	NA	Kaupova 2016
Mikulcice	Czech Republic	48.8	17.08		MikF25		Sus	Sus domesticus	bone	bone	NA	NA	NA				c. 1ka	0.2	3.3	538	168	NA	Kaupova 2016
Mikulcice	Czech Republic	48.8	17.08		MikF22		Sus	Sus domesticus	bone	bone	NA	NA	NA				c. 1ka	0.2	1	559	175	NA	Kaupova 2016
Pohansko	Czech Republic	48.72	16.89		POHF07		Sus	Sus scrofa domestica	bone	bone	NA	NA	NA				c. 1ka	0.2	0.4	511	160	NA	Kaupova 2016
Stranska Skala	Czech Republic	49.19	16.67	21/I +22/1 4.7.1986	UPN-634	SK15	Equus	Equus sp.	bone	metapodial	NA	NA	NA	NA	NA		c. 23 -24 ka	0.132643	-2.83932	428.507	130.423	NA	This study
Stranska Skala	Czech Republic	49.19	16.67	21/II 4.7 9986	UPN-627	SK8	Equus	Equus sp.	bone	metapodial	NA	NA	NA	NA	NA		c. 23 -24 ka	0.190832	-5.33936	573.194	170.519	NA	This study
Stranska Skala	Czech Republic	49.19	16.67	SS. 23/IV 9.7 1986	UPN-626	SK7	Equus	Equus sp.	bone	metapodial	OxA-V-3079-30	19884	64	23950	23800	23885	c. 23 -24 ka	0.17044	-13.3624	672.109	209.073	This study	This study
Stranska Skala	Czech Republic	49.19	16.67	S.S. 5/II-III 17.7.1986	UPN-630	SK11	Equus	Equus sp.	bone	metapodial	NA	NA	NA	NA	NA		c. 23 -24 ka	0.1539	-9.23381	720.098	218.769	NA	This study
Stranska Skala	Czech Republic	49.19	16.67	SB ER2 56	UPN-628	SK9	Equus	Equus sp.	bone	metapodial	OxA-V-3079-31	19375	63	23692	23166	23322	c. 23 -24 ka	0.178945	-7.40443	601.418	180.193	This study	This study
Stranska Skala	Czech Republic	49.19	16.67	S.S.6/II 5 15.7.1982	UPN-629	SK10	Equus	Equus sp.	bone	metapodial	OxA-V-3079-32	19441	65	23720	23255	23451	c. 23 -24 ka	0.183019	-3.05993	583.26	177.221	This study	This study
Stranska Skala	Czech Republic	49.19	16.67	SS 3/IV-V 17.7.1986	UPN-631	SK12	Equus	Equus sp.	bone	metapodial	OxA-V-2776-23C	19670	80	23817	23431	23591	c. 23 -24 ka	0.169625	-11.7469	659.624	201.355	This study	This study
Stranska Skala	Czech Republic	49.19	16.67	SS IV A/2 59	UPN-625	SK6	Equus	Equus sp.	bone	metapodial	NA	NA	NA	NA	NA		c. 23 -24 ka	0.202249	-4.05734	524.71	157.586	NA	This study
Stranska Skala	Czech Republic	49.19	16.67	SS IV B/3	UPN-623	SK4	Equus	Equus sp.	bone	metapodial	NA	NA	NA	NA	NA		c. 23 -24 ka	0.166525	-10.3278	696.242	215.364	NA	This study
Stranska Skala	Czech Republic	49.19	16.67	SS IV B1	UPN-622	SK3	Equus	Equus sp.	bone	metapodial	NA	NA	NA	NA	NA		c. 23 -24 ka	0.152202	-9.22741	743.156	228.931	NA	This study
Stranska Skala	Czech Republic	49.19	16.67	SS IV B1	UPN-620	SK1	Equus	Equus sp.	bone	metapodial	NA	NA	NA	NA	NA		c. 23 -24 ka	0.163175	-9.55772	705.128	218.026	NA	This study
Stranska Skala	Czech Republic	49.19	16.67	SS IV D 51	UPN-624	SK5	Equus	Equus sp.	bone	metapodial	NA	NA	NA	NA	NA		c. 23 -24 ka	0.230399	-3.31019	468.192	143.249	NA	This study
Stranska Skala	Czech Republic	49.19	16.67	SS. V/S	UPN-632	SK13	Equus	Equus sp.	bone	metapodial	OxA-V-3079-33	19532	65	23749	23376	23517	c. 23 -24 ka	0.218899	-2.88406	495.914	150.549	This study	This study
Stranska Skala	Czech Republic	49.19	16.67	SS V/5	UPN-633	SK14	Equus	Equus sp.	bone	not specified	OxA-V-3079-34	19802	66	23868	23776	23825	c. 23 -24 ka	0.166396	-7.09017	673.633	205.95	This study	This study
Stranska Skala	Czech Republic	49.19	16.67	21/III 3.7.1986	UPN-635	SK16	Equus	Equus sp.	bone	metapodial	OxA-V-3079-35	19787	66	23860	23770	23816	c. 23 -24 ka	0.179609	-12.1418	625.904	193.435	This study	This study
Kůlna	Czech Republic	49.41	16.74	Layer 4 sektor A, 9d, found 1961	UPN-085		Rangifer	Rangifer tarandus	bone	phalange 2	OxA-V-3071-10C	19980	70	24082	23867	23988	c. 23 -24 ka	0.21	-9.2	530	160	Reade et al., 2021	Reade et al., 2021
Dolni Vestonice	Czech Republic	48.88	16.67	AKC156 Box327B	DOL48		Equus	Equus sp.	bone	Phalanx	NA	NA	NA	NA	NA		c. 29 - 33 ka	0.24	-5.96064	368.565	112.649	NA	This study
Dolni Vestonice	Czech Republic	48.88	16.67	AKC158 Box333B 1957	DOL47		Equus	Equus sp.	bone	metatarsal	NA	NA	NA	NA	NA		c. 29 - 33 ka	0.21	-3.79157	431.216	133.557	NA	This study
Pavlov	Czech Republic	48.87	16.67	1953 NW 028B 164	PAV49		Equus	Equus sp.	bone	Femur	NA	NA	NA	NA	NA		c. 29 - 33 ka	0.12	-3.68619	759.12	231.796	NA	This study
Pavlov	Czech Republic	48.87	16.67	1953 NW 037A 164	PAV42		Equus	Equus sp.	bone	Mandible	NA	NA	NA	NA	NA		c. 29 - 33 ka	0.14	-2.55889	782.537	240.863	NA	This study
Pavlov	Czech Republic	48.87	16.67	1953 NW 038F 164	PAV46		Equus	Equus sp.	bone	Maxilla	NA	NA	NA	NA	NA		c. 29 - 33 ka	0.14	-4.16752	820.798	241.524	NA	This study
Pavlov	Czech Republic	48.87	16.67	1954 NW 041F 165	PAV45		Equus	Equus sp.	bone	Scapula	NA	NA	NA	NA	NA		c. 29 - 33 ka	0.14	-0.886399	761.742	217.681	NA	This study
Pavlov	Czech Republic	48.87	16.67	1954 NW 048A 165	PAV40		Equus	Equus sp.	bone	Metapodial	NA	NA	NA	NA	NA		c. 29 - 33 ka	0.14	0.907396	860.645	237.776	NA	This study
Pavlov	Czech Republic	48.87	16.67	1957 SW 214C an9/77	PAV9		Equus	Equus sp.	bone	Tibia	NA	NA	NA	NA	NA		c. 29 - 33 ka	0.14	-1.412	601.441	181.52	NA	This study
Pavlov	Czech Republic	48.87	16.67	1958 SW 218D an13/77	PAV6		Equus	Equus sp.	bone	Tibia	NA	NA	NA	NA	NA		c. 29 - 33 ka	0.16	-2.28871	675.605	202.049	NA	This study
Pavlov	Czech Republic	48.87	16.67	1958 SW 219D an13/77	PAV2		Equus	Equus sp.	bone	Tibia	NA	NA	NA	NA	NA		c. 29 - 33 ka	0.16	-3.64239	678.553	207.829	NA	This study
Dolni Vestonice	Czech Republic	48.88	16.67	no akc number ex1927 Box238	DOL35		Mammuthus	Mammuthus primigenius	bone	not given	NA	NA	NA	NA	NA		c. 29 - 33 ka	0.15	0.290774	570.725	177.931	NA	This study
Pavlov	Czech Republic	48.87	16.67	1953 NW 028E 164	PAV52		Mammuthus	Mammuthus primigenius	bone	Long bone	NA	NA	NA	NA	NA		c. 29 - 33 ka	0.15	-2.01063	687.315	206.089	NA	This study
Pavlov	Czech Republic	48.87	16.67	1953 NW 029A 164	PAV54		Mammuthus	Mammuthus primigenius	bone	Rib	NA	NA	NA	NA	NA		c. 29 - 33 ka	0.15	-2.81302	607.823	183.618	NA	This study
Pavlov	Czech Republic	48.87	16.67	1953 NW 030F 164	PAV51		Mammuthus	Mammuthus primigenius	bone	Tibia ?	NA	NA	NA	NA	NA		c. 29 - 33 ka	0.13	-3.05369	758.608	231.406	NA	This study
Pavlov	Czech Republic	48.87	16.67	1953 NW 031C 164	PAV50		Mammuthus	Mammuthus primigenius	bone	Long bone	NA	NA	NA	NA	NA		c. 29 - 33 ka	0.12	-3.28727	716.924	218.963	NA	This study
Pavlov	Czech Republic	48.87	16.67	1953 NW 037D 164	PAV57		Mammuthus	Mammuthus primigenius	bone	Rib	NA	NA	NA	NA	NA		c. 29 - 33 ka	0.14	-3.96629	747.847	221.974	NA	This study
Pavlov	Czech Republic	48.87	16.67	1954 NW 045E 165	PAV55		Mammuthus	Mammuthus primigenius	bone	Rib	NA	NA	NA	NA	NA		c. 29 - 33 ka	0.12	-2.79077	716.946	196.115	NA	This study
Pavlov	Czech Republic	48.87	16.67	1958 SW 219E an13/77	PAV23		Mammuthus	Mammuthus primigenius	bone	Rib	NA	NA	NA	NA	NA		c. 29 - 33 ka	0.14	-2.47376	695.23	204.301	NA	This study
Dolni Vestonice	Czech Republic	48.88	16.67	akc145 1928 Box251Aa	DOL23		Rangifer	Rangifer tarandus	bone	Phalanx	OxA-V-3138-12C	25930	120	30256	30051	30162	c. 29 - 33 ka	0.15	0.1109	726.427	220.344	This study	This study
Pavlov	Czech Republic	48.87	16.67	1953 NW 028F 164	PAV67		Rangifer	Rangifer tarandus	bone	Metapodial	NA	NA	NA	NA	NA		c. 29 - 33 ka	0.18	0.765694	478.699	145.993	NA	This study
Pavlov	Czech Republic	48.87	16.67	1953 NW 029B 164	PAV70		Rangifer	Rangifer tarandus	bone	Tibia	NA	NA	NA	NA	NA		c. 29 - 33 ka	0.18	-1.51837	587.817	178.346	NA	This study
Pavlov	Czech Republic	48.87	16.67	1953 NW 030C 164	PAV60		Rangifer	Rangifer tarandus	bone	Metatarsal	NA	NA	NA	NA	NA		c. 29 - 33 ka	0.19	0.173703	554.639	166.541	NA	This study
Pavlov	Czech Republic	48.87	16.67	1953 NW 031A 164	PAV65		Rangifer	Rangifer tarandus	bone	Tibia	NA	NA	NA	NA	NA		c. 29 - 33 ka	0.16	-1.04594	373.426	115.63	NA	This study
Pavlov	Czech Republic	48.87	16.67	1953 NW 031C 164	PAV66		Rangifer	Rangifer tarandus	bone	Tibia	NA	NA	NA	NA	NA		c. 29 - 33 ka	0.23	0.798728	458.386	138.562	NA	This study
Pavlov	Czech Republic	48.87	16.67	1953 NW 032D 164	PAV64		Rangifer	Rangifer tarandus	bone	Metatarsal	NA	NA	NA	NA	NA		c. 29 - 33 ka	0.2	-1.86078	555.754	162.859	NA	This study
Pavlov	Czech Republic	48.87	16.67	1953 NW 033E 164	PAV63		Rangifer	Rangifer tarandus	bone	Phalanx	NA	NA	NA	NA	NA		c. 29 - 33 ka	0.17	-1.1765	423.379	129.443	NA	This study
Pavlov	Czech Republic	48.87	16.67	1953 NW 037D 164	PAV68		Rangifer	Rangifer tarandus	bone	Humerus	NA	NA	NA	NA	NA		c. 29 - 33 ka	0.22	0.757829	511.877	155.615	NA	This study
Pavlov	Czech Republic	48.87	16.67	1953 NW 038D 164	PAV69		Rangifer	Rangifer tarandus	bone	Phalanx	NA	NA	NA	NA	NA		c. 29 - 33 ka	0.16	-0.0979107	603.577	184.548	NA	This study
Pavlov	Czech Republic	48.87	16.67	1957 SW 208D an9/77	PAV21		Rangifer	Rangifer tarandus	bone	Humerus	NA	NA	NA	NA	NA		c. 29 - 33 ka	0.17	-0.332295	519.834	156.444	NA	This study
Pavlov	Czech Republic	48.87	16.67	1957 SW 210A an9/77	PAV13		Rangifer	Rangifer tarandus	bone	Tibia	NA	NA	NA	NA	NA		c. 29 - 33 ka	0.14	0.516355	800.799	231.757	NA	This study
Pavlov	Czech Republic	48.87	16.67	1958 SW 218D an13/77	PAV19		Rangifer	Rangifer tarandus	bone	Tibia	NA	NA	NA	NA	NA		c. 29 - 33 ka	0.14	-2.67348	762.004	226.932	NA	This study
Predmosti I	Czech Republic	49.47	17.44	Bigger	PRDM-32		Bison	bovini cf. Bison	bone	Metapodium (dist.)	NA	NA	NA	NA	NA		c. 29.5 - 31.5 ka	0.13	2.8	858	267	NA	Bocherens et al., 2015c
Predmosti I	Czech Republic	49.47	17.44		PRDM-35		Bison	bovini cf. Bison	bone	Metapodium	NA	NA	NA	NA	NA		c. 29.5 - 31.5 ka	0.12	3.7	868	253	NA	Bocherens et al., 2015c
Predmosti I	Czech Republic	49.47	17.44	Piece taken on mandible, not teeth	PRDM-37		Cervus elaphus	Cervus elaphus	bone	Mandible	NA	NA	NA	NA	NA		c. 29.5 - 31.5 ka	0.14	0.2	696	196	NA	Bocherens et al., 2015c
Predmosti I	Czech Republic	49.47	17.44		TSK-II 3		Mammuthus	Mammuthus primigenius	tooth	tusk	NA	NA	NA	NA	NA		c. 29.5 - 31.5 ka	0.16	3.5	627	194	NA	Bocherens et al., 2015c
Predmosti I	Czech Republic	49.47	17.44	5 ≠ individuals	PRDM-3		Rangifer	Rangifer tarandus	bone	Humerus (distal end)	NA	NA	NA	NA	NA		c. 29.5 - 31.5 ka	0.13	0.8	797	228	NA	Bocherens et al., 2015c
Predmosti I	Czech Republic	49.47	17.44	5 ≠ individuals	PRDM-1		Rangifer	Rangifer tarandus	bone	Humerus (distal end)	NA	NA	NA	NA	NA		c. 29.5 - 31.5 ka	0.14	-0.4	738	218	NA	Bocherens et al., 2015c

## Sheet: SI Bibliography
Short reference	Full reference
Arppe et al. 2019	Arppe, L., Karhu, J.A., Vartanyan, S., Drucker, D.G., Etu-Sihvola, H., et al. (2019). Thriving or surviving? The isotopic record of the Wrangel Island woolly mammoth population. Quaternary Science Reviews 222, 105884.
Bachura & Kosintsev 2007	Bachura O, Kosintsev P. (2007) Late Pleistocene and holoene small- and large-mammal faunas from the Northern Urals. Quatern. Int. 160, 121-128.
Barnes et al. 2007	Barnes I., Shapiro B., Lister A., Kuznetsova T., Sher A., et al. (2007) Genetic structure and extinction of the woolly mammoth, Mammuthus primigenius. Current Biology 17(12), 1072.
Blore 2012	Blore, J.D. (2012). Lynx Cave, Denbigshire. 50 years of Excavation 1962 - 2012. Blore, Wallasey.
Bocherens et al. 2011	Bocherens, H., Drucker, D.G., Bonjean, D., Bridault, A., Conard, N.J., et al. (2011). Isotopic evidence for dietary ecology of cave lion (Panthera spelaea) in North-Western Europe: Prey choice, competition and implications for extinction. Quatern. Int. 245, 249-261.
Bocherens et al. 2015	Bocherens, H., Drucker, G.G., Germonpré, M., Lázničková-Galetová, M., Naitoa, Y.I. (2015). Reconstruction of the Gravettian food-web at Předmostí I using multi-isotopic tracking (13C, 15N, 34S) of bone collagen. Quaternary International 359-360: 211-228
Bollongino et al. 2013	Bollongino, R., Nehlich, O., Richards, M.P., Orschiedt, J., Thomas, M.G., et al. (2013). 2000 years of parallel societies in stone age central Europe. Science 342 (61757), 479-481.
Brace 2011	Brace, S. (2011), Investigating evolutionary processes using ancient and historical DNA of rodent species. Unpublished thesis submitted to University of London.
Bridault et al. 2000	Bridault, A., Chaix, L., Pion, G., Oberlin, C., Thiébault, S., et al. (2000). Position chronologique du renne (Rangifer tarandus L.) à la fin du Tardiglaciaire dans les Alpes du Nord françaises et le Jura méridional. In Pion, G (Ed.). Le Paléolithique supérieur récent: nouvelles données sur le peuplement et l'environnement. Société Préhistorique Française 47-57.
Chlachula 2010	Chlachula, J. (2010) Environmental context of Pleistocene peopling of the Central Urals. Quatern. Int. 220, 47-63.
Conard 2004	Conard, N.J. (2004) Mitteilungen des Gesellschaft fur Urgeschichte 13: 29-59.
Coutard et al. 2010	Coutard, S., Ducrocq, T., Limondin‑Lozouet, N., Bridault, A., Leroyer, C., et al. (2010). Contexte géomorphologique, chronostratigraphique et paléoenvironnemental des sites mésolithiques et paléolithiques de Warluis dans la vallée du Thérain (Oise, France). Quaternaire, 21, 357-384.
Cupillard & Welté 2006	Cupillard, C., & Welté, A.C. (2006). Le Magdalénien de la grotte « Grappin » à Arlay (Jura, France) : nouveaux regards. L'Anthropologie, 110, 624-683.
Currant & Jacobi 2011	Currant, A.P., & Jacobi, R. (2011). 10 - The Mammal Faunas of the British Late Pleistocene. In Ashton, N., Lewis, S. and Stringer, C., Eds. The Ancient Human Occupation of Britain. Developments in Quaternary Science, 14, 165-180.
Dehasque et al. 2021	Dehasquem M., Pečnerová, P., Muller, H., Tikhonov, A., Nikolskiy, P. (2021) Combining Bayesian age models and genetics to investigate population dynamics and extinction of the last mammoths in northern Siberia. Quaternary Science Reviews 250, 106913.
Drucker et al. 2003	Drucker, D.G., Bocherens, H., Bridault, A., Billiou, D. (2003). Carbon and nitrogen isotopic composition of red deer (Cervus elaphus) collagen as a tool for tracking palaeoenvironmental change during the Late-Glacial and Early Holocene in the northern Jura (France). Palaeogeography, Palaeoclimatology, Palaeoecology, 195, 375-388.
Drucker et al. 2008	Drucker, D.G., Bridault, A., Hobson, K.A., Szuma, E., Bocherens, H. (2008). Can carbon-13 in large herbivores reflect the canopy effect in temperate and boreal ecosystems? Evidence from modern and ancient ungulates. Palaeogeography, Palaeoclimatology, Palaeoecology, 266, 69-82.
Drucker et al. 2011	Drucker, D.G., Bridault, A., Cupillard, C., Hujic, A., & Bocherens, H. (2011). Evolution of habitat and environment of red deer (Cervus elaphus) during the Late-glacial and early Holocene in eastern France (French Jura and the western Alps) using multi-isotope analysis (δ13C, δ15N, δ18O, δ34S) of archaeological remains. Quatern. Int., 245, 268-278.
Drucker et al. 2012	Drucker, D.G., Bridault, A., & Cupillard, C. (2012). Environmental context of the Magdalenian settlement in the Jura Mountains using stable isotope tracking (13C, 15N, 34S) of bone collagen from reindeer (Rangifer tarandus). Quatern. Int. 272, 322-332.
Drucker et al. 2015a	Drucker, D.G., Vercoutère, C., Chiotti, L., Nespoulet, R., Crépin, L., Conard, N.J., Münzel, S., Higham, T.F., Plicht, J.V., Lázničková-Galetová, M., & Bocherens, H. (2015a). Tracking possible decline of woolly mammoth during the Gravettian in Dordogne (France) and the Ach Valley (Germany) using multi-isotope tracking (13C, 14C, 15N, 34S, 18O). Quatern. Int. 359, 304-317.
Drucker et al. 2015b	Drucker, D. G., Rivals, F., Münzel, S. C. & Bocherens, H. (2015b). Stable isotope and microwear investigation on the mammoth (Mammuthus primigenius) of Kraków Spadzista: insights into diet and environment. In Wojtal, P., Wilczyński, J. & Haynes, G. (eds.) A Gravettian Site in Southern Poland: Kraków Spadzista, 189–202 (ISEA PAS, Kraków 2015).
Drucker et al. 2018	Drucker, D.G., Stevens, RE., Germonpré, M., Sablin, M.V., Péan, S. et al., (2018). Collagen stable isotopes provide insights into the end of the mammoth steppe in the central East European plains during the Epigravettian. Quaternary Research. 90, 457-469.
Drucker et al. 2020	Drucker, D.G., Bridault, A., Ducrocq, T., Baumann, C., & Valentin, F. (2020). Environment and human subsistence in Northern France at the Late Glacial to early Holocene transition. Archaeological and Anthropological Sciences, 12, 1-16.
Drucker et al. 2021	Drucker, D.G., Naito, Y.I., Coromina, N., Rufí, I., Soler, N., & Soler, J. (2021). Stable isotope evidence of human diet in Mediterranean context during the Last Glacial Maximum. Journal of Human Evolution, 154, 102967 .
Fagnart 1997	Fagnart J.-P. (1997) La fin des temps glaciaires dans le Nord de la France. Approche archéologique et environnementale des occupations humaines du Tardiglaciaire. Paris: Société Préhistorique Française.
Fernandes et al. 2015	Fernandes et al., (2015). Quantitative Diet Reconstruction of a Neolithic Population Using a Bayesian Mixing Model (FRUITS): The Case Study of Ostorf (Germany). American Journal of Physical Anthropology 158, 325-340.
Fidel et al. 2013	Fiedel, S., Southon, J., Taylor, R., Kuzmin, Y., Street, M., et al. (2013). Assessment of Interlaboratory Pretreatment Protocols by Radiocarbon Dating an Elk Bone Found Below Laacher See Tephra at Miesenheim IV (Rhineland, Germany). Radiocarbon, 55(3), 1443-1453.
Fiedel et al. 2013	Fiedel, S., Southon, J., Taylor, R., Kuzmin, Y., Street, M., Higham, T., et al. (2013). Assessment of Interlaboratory Pretreatment Protocols by Radiocarbon Dating an Elk Bone Found Below Laacher See Tephra at Miesenheim IV (Rhineland, Germany). Radiocarbon, 55(3), 1443-1453.
Fraser et al. 2017	Fraser, S., Elsner, J., Hamilton, W.D., Sayle, K.L., Schulumbaum, A., et al. (2017). Matrilines in Neolithic cattle from Orkney, Scotland reveals complex husbandry patterns of ancestry. Journal of Archaeological Science reports 14, 46-54.
Germonpre et al. 2009	Germonpré, M., Sablin, M.V., Stevens, R.E., Hedges, R.E.M.,Hofreiter, M., et al. (2009). Fossil dogs and wolves from Palaeolithic sites in Belgium, the Ukraine and Russia: osteometry, ancient DNA and stable isotopes. Journal of Archaeological Science 36 (2), 473-490
González-Rabanal et al. 2020	González-Rabanal, B., Marín-Arroyo, A.B., Jones, J.R., Pérez, L.A., Vega-Maeso, C., et al. (2020). Diet, mobility and death of Late Neolithic and Chalcolithic groups of the Cantabrian Region (northern Spain). A multidisciplinary approach towards studying the Los Avellanos I and II burial caves. Journal of Archaeological Science, 34, Part A
Haesaerts et al. 2015	Haesaerts, P., Péan, S., Valladas, H., Damblon, F., Nuzhnyi, D., 2015. Contribution à la stratigraphie du site paléolithique de Mezhyrich (Ukraine). L’Anthropologie 119, 364–393.
Hedges et al. 1987	Hedges, R.E.M, Pettitt, P.B., Bronk-Ramsey, C., Van Klinken, G.J. (1987). Radiocarbon dates from the Oxford AMS system: Archaeometry Datelist No. 6: Archaeometry 29(2), 289-306.
Hedges et al. 1992	Hedges, R.E.M., Housley, R.A., Bronk, C.R., Van Klinken, G.J. (1992). Radiocarbon dates from the Oxford AMS system: Archaeometry Datelist No. 15. Archaeometry 34(2) , 337-357
Hedges et al. 1993	Hedges, R.E.M., Housley, R.A., Bronk, C.R., Van Klinken, G.J. (1993) Radiocarbon dates from the Oxford AMS system: Archaeometry Datelist No. 16: Archaeometry 35(1), 147-167
Hedges et al. 1994	Hedges, R.E.M, Housley, R.A., Ramsey, C.B., & Klinken, G.J. (1994). Radiocarbon dates from the Oxfrod AMS System: Archaeometry datelist 18. Archaeometry, 36, 337-374.
Hedges et al. 1996	Hedges, R.E.M, Pettitt, P.B., Bronk-Ramsey, C., Van Klinken, G.J. (1996). Radiocarbon dates from the Oxford AMS system: Archaeometry Datelist No. 22: Archaeometry 38(2), 391-415
Hedges et al. 1998	Hedges, R.E., Pettitt, P., Ramsey, C.B., & Klinken, G.J. (1998). Radiocarbon dates from the Oxford AMS system: Archaeometry Datelist 25. Archaeometry, 40, 227-239.
Higham 2011	Higham, T.F. (2011). European Middle and Upper Palaeolithic radiocarbon dates are often older than they look: problems with previous dates and some remedies. Antiquity, 85, 235 - 249.
Higham et al. 2011	Higham, T.F., Jacobi, R., Basell, L.S., Ramsey, C.B., Chiotti, L. et al. (2011). Precision dating of the Palaeolithic: a new radiocarbon chronology for the Abri Pataud (France), a key Aurignacian sequence. Journal of Human Evolution, 61 5, 549-63.
Higham et al. 2012	Higham, T.F., Basell, L.S., Jacobi, R., Wood, R., Ramsey, C.B., et al. (2012). Τesting models for the beginnings of the Aurignacian and the advent of figurative art and music: the radiocarbon chronology of Geißenklösterle. Journal of human evolution, 62 6, 664-76 .
Housley et al. 1997	Housley, R.A., Gamble, C., Street, M., Pettitt, P. (1997). Radiocarbon evidence for the Lateglacial human recolonisation of northern Europe. Proceedings of the Prehistoric Society 63, 25-54
Jacobi & Higham 2009a	Jacobi, R., & Higham, T.F. (2009a). The early Lateglacial re-colonization of Britain: new radiocarbon evidence from Gough's Cave, southwest England. Quaternary Science Reviews, 28, 1895-1913.
Jacobi & Higham 2009b	Jacobi, R. & Higham, T. F. G. (2009b). Radiocarbon dating of the later Upper Palaeolithic huma occupation of Kent's Cavern, Devon, England: new AMS results. In Burduliewicz, J., Cyrek, K., Dyczek, P., and Szymcak, K. (Eds.) Understanding the Past. Papers offered to Stefan K. Kozłowski. Center for Research on the Antiquity of Southeastern Europe, 137-154.
Jacobi & Higham 2011	Jacobi, R. and Higham, T.F.G. (2011) The Later Upper Palaeolithic recolonisation of Britain: new results from AMS radiocarbon dating. In Ashton, N., Lewis, S. and Stringer, C., Eds. The Ancient Human Occupation of Britain.Developments in Quaternary Science, 14, 223-247.
Jacobi et al. 2009	Jacobi, R., Rose, J., Macleod, A., Higham, T.F. (2009). Revised radiocarbon ages on woolly rhinoceros (Coelodonta antiquitatis) from western central Scotland: significance for timing the extinction of woolly rhinoceros in Britain and the onset of the LGM in central Scotland. Quaternary Science Reviews, 28, 2551-2556.
Jones et al. 2018a	Jones, J.R., Richards, M., Straus, L.G., Reade, H., Altuna, J. (2018a). Changing environments during the Middle-Upper Palaeolithic transition in the eastern Cantabrian Region (Spain): direct evidence from stable isotope studies on ungulate bones. Scientific Reports, 8.
Jones et al. 2018b	Jones, J.R., Richards, M., Reade, H., Bernaldo de Quirós, F., Marín‐Arroyo, A.B. (2018b). Multi-Isotope investigations of ungulate bones and teeth from El Castillo and Covalejos caves (Cantabria, Spain): Implications for paleoenvironment reconstructions across the Middle-Upper Palaeolithic transition. Journal of Archaeological Science: Reports.
Kaagan 2000	Kaagan, L.M. (2000). The horse in late Pleistocene and Holocene Britain. PhD thesis, UCL
Kuc et al. 2005	Kuc, T., Rozanski, K., Goslar, T., Kubiak, H., Kotarba, M.J. (2005). Radiocarbon dating of remnants of Woolly Rhinoceroses and Mammoth from Starunia, fore-Carpathians, Ukraine. In Kotarba, M.J., (Ed.) Geological Studies 2004–2005 at Starunia - The Area of Discoveries of Woolly Rhinoceroses. Warsaw-Kraków, Polish Geological Institute and Society of Research on Environmental Changes “Geosphere”, 19…
Leduc et al. 2013	Leduc, C., Bridault, A.,Souffi, B.,David, É., Drucker, D.G. (2013). Apports et limites de l'étude des vestiges fauniques à la caractérisation d'un site mésolithique de plein air à Paris:«62 rue Henry-Farman»(15 e arrondissement). Bulletin de la Société préhistorique française, 257-280.
Lister & Stuart 2019	Lister, A.M., Stuart, A.J. (2019). The extinction of the giant deer Megaloceros giganteus (Blumenbach): New radiocarbon evidence. Quartern. Int. 500, 185-203.
Lord et al. 2007	Lord, T.C., O'Connor, T., Siebrandt, D.C., & Jacobi, R. (2007). People and large carnivores as biostratinomic agents in Lateglacial cave assemblages. Journal of Quaternary Science, 22, 681-694.
Lorenzen et al. 2011	Lorenzen, E.D., Nogues-Bravo, D., Orlando, L., Weinstock, J., Binladen, J., et al. (2011). Species-specific responses of Late Quaternary megafauna to climate and humans. Nature, 479, 359-364.
Marr 2017	Marr, M. (2017) Faunal response to abrupt climate change: the history of the British mammal fauna from the Lateglacial to the Early Holocene. Royal Hollway, University of Londom, PhD thesis
Nadachowski et al 2018	Nadachowski, A., Lipecki, G., Baca, M., Żmihorski, M., Wilczyński, J., (2018). Impact of climate and humans on the range dynamics of the woolly mammoth (Mammuthus primigenius) in Europe during MIS 2. Quaternary Research 90, 439 - 456.
Nerudová & Neruda, 2014	Nerudová, Z. & Neruda, P. (2014) Chronology of the Upper Palaeolithic sequence in the Kůlna Cave (okr. Blansko/CZ). Archäologisches Korrespondenzblatt 44, 307-324.
Nikolskiy et al. 2011	Nikolskiy, P.A., Sulerzhitsky, L.D., Pitulko, V.V. (2011). Last straw versus Blitzkrieg overkill: Climate-driven changes in the Arctic Siberian mammoth population and the Late Pleistocene extinction problem. Quaternary Science Reviews 30, 2309-2328.
Nyström et al. 2012	Nystrom, H.V., Skoglund, J., McKeown, P., Vartanyan, N.J., Shaw, S., et al. (2012) Microsatellite genotyping reveals end-Pleistocene decline in mammoth autosomal genetic variation. Molecular Ecology, 21(14), 3391-3402.
O'Connor & Lord 2015	O'Connor, T., Lord, T.C. (2013) Cave palaeontology. In Waltham, T. & Lowe, D. (Eds.), Caves and Karst of the Yorkshire Dales. vol. 1, British Cave Research Association, Buxton, 225-238.
ORAU cited in Stevens 2005	Oxford Radiocarbon Accelerator Unit database, University of Oxford. As cited in Stevens (2005).
Otte & Miller 1999	Otte, M., Miller, R. (1999). Chronologie paléolithique du Benelux: phase récente (40-10000 BP). In Vermeerch, P.M. Renault-Miskovsky, J. (Eds.) European Late Pleistocene, Isotope Stages 2 and 3: humans, their ecology & cultural adaptations. Porceedings of a Conferene held at the Katholieke Universiteit Leuven 5 September 1998. Eraul, 90, 81-95.
Palkopoulou et al. 2013	Palkopoulou, E., Dalen, L., Lister, A.M., Vartanyan, S., Sablin, M., et al. (2013) Holarctic genetic structure and range dynamics in the woolly mammoth. Proceedings of the Royal Society B: Biological Sciences, 280(1770), 20131910-20131910.
Petrova 2009	Petrova E.A. (2009). Mammoth (Mammuthus primigenius) from the Late Pleistocene of Chuvashiya, European Russia. Proceedings of the Zoological Institute RAS. Vol.313. No.1. 58–67.
Ponomarev et al. 2013	Ponomarev, D., Puzachenko, A., Bachura, O., Kosintsev, P., van der Plicht, J. (2013). Mammal fauna during the Late Pleistocene and Holocene in the far northeast of Europe. Boreas, 42(3), 779-797.
Reade et al. 2020a	Reade, H., Tripp, J.A., Charlton, S., Grimm, S.B., Sayle, K.L., Fensome, A., Higham, T.F., Barnes, I., & Stevens, R.E. (2020a). Radiocarbon chronology and environmental context of Last Glacial Maximum human occupation in Switzerland. Scientific Reports, 10.
Reade et al. 2020b	Reade, H., Tripp, J.A., Charlton, S., Grimm, S.B., Leesch, D., Müller, W., Sayle, K.L., Fensome, A., Higham, T.F., Barnes, I., & Stevens, R.E. (2020b). Deglacial landscapes and the Late Upper Palaeolithic of Switzerland. Quaternary Science Reviews, 239, 106372.
Reade et al. 2021	Reade, H., Grimm, S.B., Tripp, J.A., Neruda, P., Nerudová, Z., Roblíčková, M., Sayle, K.L., Kearney, R., Brown, S., Douka, K., Higham, T.F., & Stevens, R.E. (2020). Magdalenian and Epimagdalenian chronology and palaeoenvironments at Kůlna Cave, Moravia, Czech Republic. Archaeological and Anthropological Sciences, 13.
Reade et al. 2023	Reade, H., Tripp, J.A., Frémondeau, D., Sayle, K.L., Higham, T.F., Street, M., Stevens, R.E. (2023). Nitrogen palaeo-isoscapes: Changing spatial gradients of faunal δ15N in late Pleistocene and early Holocene Europe. PlosOne.
Rey-Iglesia et al. 2021	Rey-Iglesia, A., Lister, A.M., Stuart, A.J., Bocherens, H., Szpak, P., Willerslev, E., & Lorenzen, E.D. (2021). Late Pleistocene palaeoecology and phylogeography of woolly rhinoceroses. Quaternary Science Reviews 263, 106993.
Semal et al. 2013	Semal, P., Hauzeur, A., Rougier, H., Crevecoeur, I., Germonpré, M., et al. (2013) Radiocarbon dating of human remains and associated archaeological material. In Rougier, H., Semal, P. (Eds), Spy cave. 125 years of multidisciplinary research at the Betche aux Rotches (Jemeppe-sur-Sambre, Province of Namur, Belgium), Volume 1. Anthropologia et Praehistorica, 123/2012. Brussels, Royal Belgian Instit…
Sher et al. 2005	Sher, A., Kuzmina, S., Kuznetsova, T.V., Sulerzhitsky, L. (2005). New insights into the Weichselian environment and climate of the East Siberian Arctic, derived from fossil insects, plants, and mammals. Quaternary Science Reviews 24, 533-569.
Soler & Soler 2016	Soler, N., Soler, J. (2016). The first Homo sapiens in Catalonia, hunters and gatherers from the old Upper Palaeolithic. Catalan Historical Review, 9-23.
Stevens & Hedges 2004	Stevens, R.E., & Hedges, R.E. (2004). Carbon and nitrogen stable isotope analysis of northwest European horse bone and tooth collagen, 40,000 BP–present: Palaeoclimatic interpretations. Quaternary Science Reviews, 23, 977-991.
Stevens 2005	Stevens, R.E. 2005. Establishing Links between Climate/Environment & Both Modern & Archaeological Hair & Bone Isotope Values : Determining the Potential of Archaeological Bone Collagen d13C and d15N as Palaeoclimatic and Palaeoenvironmental Proxies. University of Oxford, DPhil Thesis
Stevens et al. 2008	Stevens, R.E., Jacobi, R., Street, M., Germonpré, M., Conard, N.J., Münzel, S., & Hedges, R.E. (2008). Nitrogen isotope analyses of reindeer (Rangifer tarandus), 45,000 BP to 9,000 BP: Palaeoenvironmental reconstructions. Palaeogeography, Palaeoclimatology, Palaeoecology, 262, 32-45.
Stevens et al. 2009a	Stevens, R.E., O’Connell, T.C., Hedges, R.E., & Street, M. (2009a). Radiocarbon and stable isotope investigations at the Central Rhineland sites of Gönnersdorf and Andernach-Martinsberg, Germany. Journal of human evolution, 57 2, 131-48 .
Stevens et al. 2009b	Stevens, R.E., Germonpré, M., Petrie, C.A., & O’Connell, T.C. (2009b). Palaeoenvironmental and chronological investigations of the Magdalenian sites of Goyet Cave and Trou de Chaleux (Belgium), via stable isotope and radiocarbon analyses of horse skeletal remains. Journal of Archaeological Science, 36, 653-662.
Stevens et al. 2010	Stevens, R.E. .R.M. Jacobi, T.F.G. Higham. Reassessing the diet of upper palaeolithic humans from Gough's cave and sun hole, cheddar gorge, Somerset, UK. Journal of Archaeological Science 37, 52-61
Stevens et al. 2021	Stevens, R.E., Reade, H., Tripp, J., Sayle, K.L., Walker, E.A. 2021. Changing environment at the Late Upper Palaeolithic site of Lynx Cave, North Wales. In Joris, O. & Gaudzinski-Windheuser, S. (Eds.) The Beef Behind all Possible Pasts. The Tandem-Festschrift in Honour of Elaine Turner and Martin Street. Volume 2. Monographien des Romisch-Germanischen Zentralmuseums 157, Mainz. pp 589-608.
Street et al. 1994	Street. M,, Baales, M., Weninger, B. (1994) Absolute Chronologie des späten Paläolithikums und Frühmesolithikums im nördlichen Rheinland. Archäologisches Korrespondenzblatt 24, 1–28.
Stuart & Lister 2004	Stuart, A.J., Kosintsev, P.A., Higham, T.F.G., Lister, A.M. (2004). Pleistocene to Holocene extinction dynamics in giant deer and woolly mammoth. Nature 431, 684– 689.
Stuart & Lister 2012	Stuart, A.J., & Lister, A.M. (2012). Extinction chronology of the woolly rhinoceros Coelodonta antiquitatis in the context of late Quaternary megafaunal extinctions in northern Eurasia. Quaternary Science Reviews, 51, 1-17.
Stuart et al. 2002	Stuart AJ, Sulerzhitsky LD, Orlova LA, Kuzmin YV, Lister AM (2002) The latest wooly mammoths (Mammuthus primigenius Blumenbach) in Europe and Asia: a review of the current evidence. Quaternary Science Reviews, 21 1559-1569.
Stuart et al. 2004	Stuart, A.J., Kosintsev, P.A., Higham, T.F., & Lister, A.M. (2004). Pleistocene to Holocene extinction dynamics in giant deer and woolly mammoth. Nature, 431, 684-689.
Stupak et al. 2014	Stupak, D. (2014). Les assemblages lithiques du site épigravettien de Buzhanka 2 (Ukraine). L’Anthropologie 118, 538–553.
Ukkonon et al. 2011	Ukkonon ,P., Aaris-Sorensen, K., Arppe, L., Clark, P.U., Daugnora, L., et al. (2011). Woolly mammoth (Mammuthus primigenius Blum.) and its environment in northern Europe during the last glaciation. Quaternary Science Reviews 30, 693-712
Vartanyan et al. 2008	Vartanyan, S.L., Arslanov, K.A., Karhu, J.A., Possnert, G., Sulerzhitsky, L.D., (2008). Collection of radiocarbon dates on the mammoths (Mammuthus primigenius) and other genera of Wrangel Island, northeast Siberia, Russia. Quaternary Research 70, 51-59.
Wißing et al. 2019	Wiβing, C., Rougier, H., Baumann, C., Comeyne, A., Crevecoeur, I., et al. (2019). Stable isotopes reveal patterns of diet and mobility in the last Neandertals and first modern humans in Europe. Scientific Reports. 9, 4433.
Wojtal 2007	Wojtal, P. (2007). Zooarchaeological studies of the Late Pleistocene sites in Poland. Institute of Systematics and Evolution of Animals, Polish Academy of Sciences, Kraków.
Yates et al. 2017	Fellows Yates, J.A., Drucker, D.G., Reiter, E., Heumos, S., Welker, F., et al. (2017). Central European Woolly Mammoth Population Dynamics: Insights from Late Pleistocene Mitochondrial Genomes. Scientific Reports, 7, 17714
